# Supplementary material
Source: PubMed Central journal article supplement (PMC3529213)

# Supporting Information

## Enantioselective Photocycloaddition of 3-Hydroxyflavones: Total Syntheses and Absolute Configuration Assignments of (+)-Ponapensin and (+)-Elliptifoline

Neil J. Lajkiewicz, Stéphane P. Roche, Baudouin Gerard, and John A. Porco, Jr. \*

Department of Chemistry and Center for Chemical Methodology and Library  
Development (CMLD-BU), Boston University, Boston, MA 02215, United States  
E-mail: [porco@bu.edu](mailto:porco@bu.edu)

### Table of Contents

|                                                                                                       |     |
|-------------------------------------------------------------------------------------------------------|-----|
| <b>I. GENERAL INFORMATION</b> .....                                                                   | S2  |
| A. Instrumentation and methods.....                                                                   | S2  |
| <b>II. EXPERIMENTAL PROCEDURES AND COMPOUND CHARACTERIZATION</b> .....                                | S3  |
| A. Preparation of Reduced Aglains in Racemic Form.....                                                | S3  |
| 1. [3+2] Photocycloaddition                                                                           | S3  |
| 2. Reagent-Controlled Reduction of Aglain                                                             | S3  |
| 3. Transesterification and Ester-Amide Exchange Protocols                                             | S7  |
| B. General Protocols to Access TADDOL Additives.....                                                  | S9  |
| C. Compound Characterization toward (+)-Ponapensin and (+)-Elliptifoline.....                         | S11 |
| D. X-Ray Crystallographic Data.....                                                                   | S24 |
| E. Calculations for Cyclic Intermediate ( <b>21</b> ) and Acyliminium Intermediate ( <b>22</b> )..... | S56 |
| F. Select Spectra.....                                                                                | S60 |
| <b>III. NATURAL PRODUCT SPECTRA</b> .....                                                             | S76 |

## I. GENERAL INFORMATION

### A. Instrumentation and methods

<sup>1</sup>H NMR spectra were recorded at 300, 400, or 500 MHz at ambient temperature with CDCl<sub>3</sub>, CD<sub>3</sub>OD, DMSO-d<sub>6</sub> or benzene-d<sub>6</sub> (Cambridge Isotope Laboratories, Inc.) as solvents. Data for <sup>1</sup>H NMR are reported as follows: chemical shift, integration, multiplicity (br = broad, ovrlp = overlapping, s = singlet, d = doublet, t = triplet, q = quartet, m = multiplet) and coupling constants in Hz. <sup>13</sup>C NMR spectra were recorded at 75.0, 100.0, or 125 MHz at ambient temperature with the same solvents unless otherwise stated. Chemical shifts are reported in parts per million relative to the deuterated solvents. All <sup>13</sup>C NMR spectra were recorded with complete proton decoupling. Infrared spectra were recorded on a Nicolet Nexus 670 FT-IR spectrophotometer. High-resolution mass spectra were obtained in the Boston University Chemical Instrumentation Center using a Waters Q-TOF API-US mass spectrometer. Melting points were recorded on a Mel-Temp apparatus (Laboratory Devices). Analytical LC-MS was performed on a Waters Acquity UPLC (Ultra Performance Liquid Chromatography (Waters MassLynx Version 4.1) with a Binary solvent manager, SQ mass spectrometer, Water 2996 PDA (PhotoDiode Array) detector, and ELSD (Evaporative Light Scattering Detector). An Acquity UPLC BEH C<sub>18</sub> 1.7 μm column was used for analytical UPLC-MS. Optical rotations were recorded on an AUTOPOL III digital polarimeter at 589 nm, and specific rotations are given  $[\alpha]_D^{20}$  (concentration in grams/100 mL solvent). SFC analysis of enantioenriched compounds was performed on a Berger SFC (Waters) System with a diode array detector using a SFC Chiralcel<sup>®</sup> OD-H (Chiral Technologies Inc., 100 × 4.6 mm I.D., 5μm) column. CD spectra were measured on an AVIV Circular Dichroism Spectrometer, Model 62DS. Preparative HPLC was performed on a Gilson PLC2020 using a Waters SunFire<sup>™</sup> Prep C18 OBD<sup>™</sup> 5μm 19X50 mm column.

Analytical thin layer chromatography was performed using 0.25 mm silica gel 60-F plates. Flash chromatography was performed using 200-400 mesh silica gel (Scientific Absorbents, Inc.). Yields refer to chromatographically and spectroscopically pure materials, unless otherwise stated. HPLC grade tetrahydrofuran, methylene chloride, diethyl ether, toluene, acetonitrile, and benzene were purchased from Fisher and VWR and were purified and dried by passing through a PURE SOLV<sup>®</sup> solvent purification system (Innovative Technology, Inc.). Other ACS grade solvents for chromatography were purchased from Clean Harbors.

Fluorescence emission spectra were recorded using a quartz cuvette at room temperature using a fluorimeter (Jobin Yvon Horiba FluoroMax 3). Select photochemistry experiments were performed using a Rayonet RPR-100 photochemical reactor equipped with RPR-3500 irradiation lamps (UVA 315-400 nm). Photochemical reactions were performed in a photobox using a Hanovia 450 W medium pressure mercury lamp housed in a quartz immersion well, cooled with a Thermo Neslab-ULT 80 system circulator. Pyrex test

tubes (16 x 100 mm) were mounted on a support approximately 5.0 cm from the immersion well lamp. A uranium filter ( $h\nu > 350$  nm) was obtained from James Glass (Hanover, MA). All other reactions were carried out in oven-dried glassware under an argon atmosphere unless otherwise noted.

## II. EXPERIMENTAL PROCEDURES AND COMPOUND CHARACTERIZATION

### A. Preparation of Reduced Aglains in Racemic Form

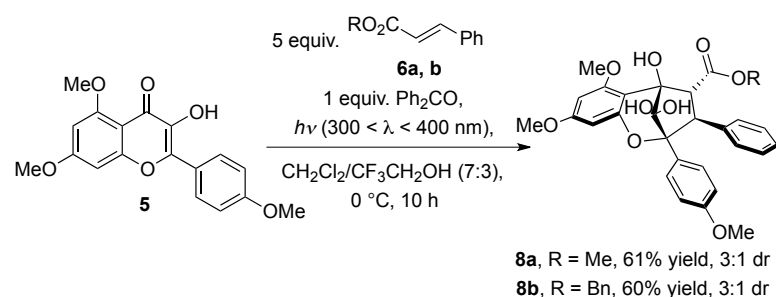

#### 1. [3+2] Photocycloaddition.

#### Procedure for [3+2] Photo-cycloaddition of 3-HF **5** and Cinnamic Esters **6a-b** (**8a-b**):

A 32 x 240 mm Pyrex test tube was charged with 3-hydroxyflavone **5** (1.0 g, 3.04 mmol, 1.0 equiv.), benzophenone (555 mg, 3.04 mmol, 1.0 equiv.) and dipolarophile **6a-b**

(15.2 mmol, 5.0 equiv.) in  $\text{CH}_2\text{Cl}_2$ -TFE (7:3, 75 mL) as solvent. After degassing with argon for 10 min, the mixture was stirred and irradiated (Rayonet,  $\lambda > 315$  nm) at 0 °C for 12 h. The crude material was concentrated under vacuum and the resulting oil was directly chromatographed on  $\text{SiO}_2$ . *Note:* decomposition was observed during chromatographic purification on silica gel. Accordingly, the  $\text{SiO}_2$  was first washed successively with (80:20:03 hexanes/EtOAc/ $\text{Et}_3\text{N}$ , one length) and (80:20 hexanes/EtOAc, one length) to neutralize surface silanols. Purification *via* flash chromatography using a gradient of hexanes/EtOAc afforded cyclopenta[bc]benzopyrans **8a-b** as mixture of isomers (61% yield **8a**, 60% **8b**). This mixture was recrystallized in acetonitrile to afford pure **8a-b** (27% **8a**, 24% **8b**). **8b**: White solid;  $R_f = 0.44$  (1:1 EtOAc/hexanes); **m.p.** 110-114 °C; **IR**  $\nu_{\text{max}}$  (film): 3484, 3014, 2939, 2840, 1731, 1618, 1590, 1517, 1490, 1456, 1252, 1217, 1148, 1094, 1003, 980, 831, 754  $\text{cm}^{-1}$ ;  **$^1\text{H NMR}$**  (500 MHz,  $\text{CDCl}_3$ )  $\delta$  7.56 (d,  $J = 9.0$  Hz, 2H), 7.33-7.30 (br dd,  $J = 6.5, 6.5$  Hz, 3H), 7.27-7.22 (overlapping m, 3H), 7.18 (d,  $J = 6.5$  Hz, 2H), 7.05 (dd,  $J = 6.8, 6.8$  Hz, 2H), 7.01 (brt,  $J = 6.8$  Hz, 1H), 6.65 (d,  $J = 9.0$  Hz, 2H), 6.21 (d,  $J = 2.2$  Hz, 1H), 6.03 (d,  $J = 2.2$  Hz, 1H), 5.89 (s, 1H), 5.05 (d,  $J = 12.8$  Hz, 1H), 4.94 (d,  $J = 12.8$  Hz, 1H), 4.24 (d,  $J = 9.2$  Hz, 1H), 3.79 (d,  $J = 9.2$  Hz, 1H), 3.77 (s, 3H), 3.70 (s, 3H), 3.57 (s, 3H), 3.18 (s, 1H);  **$^{13}\text{C NMR}$**  (125 MHz,  $\text{CD}_3\text{Cl}$ )  $\delta$  171.3, 161.5, 158.9, 158.6, 153.8, 140.0, 135.9, 130.2 (2C), 130.0 (2C), 128.7 (2C), 128.2 (2C), 128.1 (2C), 127.7 (2C), 126.7, 112.9 (2C), 103.7, 98.1, 94.7, 93.0, 88.0, 81.4, 66.7, 63.0, 55.8, 55.5, 55.2, 54.7; **HR-MS**:  $m/z$  Calcd for  $[\text{C}_{34}\text{H}_{32}\text{O}_9 + \text{Na}]^+$  607.1844, found 607.1825 (-3.1 ppm).

#### 2. Reagent-Controlled Reduction

**Screening for diastereoselective reduction at C10:** Entry 2 (Table SI-1) shows that solubilization in THF was necessary to generate a reaction with sodium borohydride. Counterion size does not affect the diastereoselectivity of  $\text{BH}_4^-$  reductions as shown in entries 2 and 3 ( $\text{Na}^+$  vs.  $\text{Bu}_4\text{N}^+$ , respectively). Entry 4 shows that addition of cerium chloride reduces the diastereoselectivity of the  $\text{NaBH}_4$  reduction. Entries 5

through 8 examine the effect of solvent on the  $\text{Me}_4\text{NBH}(\text{OAc})_3$  reduction. Entry 9 shows that a smaller counterion ( $\text{Na}^+$ ) yields better diastereoselectivity of **9a** than the corresponding  $\text{Me}_4\text{NBH}(\text{OAc})_3$  reduction. Although not shown, temperature marginally affects the diastereoselectivity of these reductions.

**Table SI-1.** Conditions Evaluated for Reduction of Hydrated Aglain **8a**

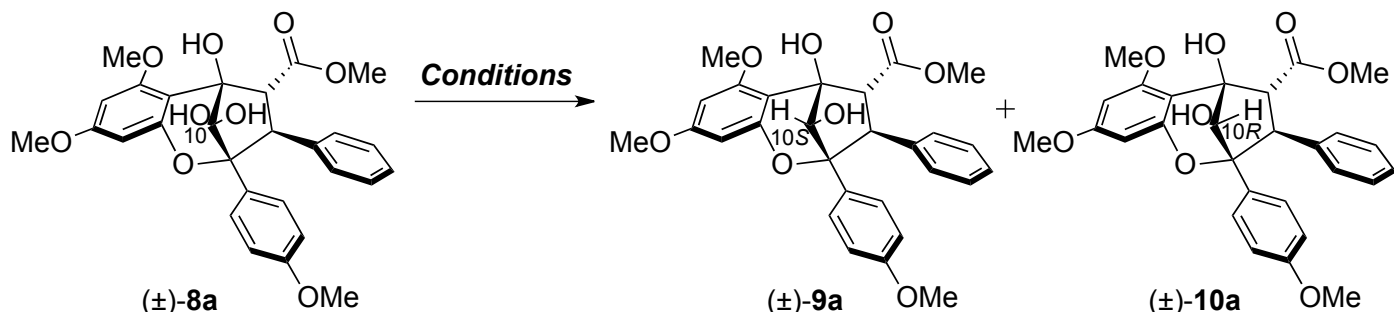

| Entry | Reagent                               | Additive        | Equiv  | Solvent                  | T (°C) | Time (h) | 9a:10a <sup>a</sup> | Conversion (%) <sup>b</sup> |
|-------|---------------------------------------|-----------------|--------|--------------------------|--------|----------|---------------------|-----------------------------|
| 1     | $\text{NaBH}_4$                       | -               | 75     | MeOH                     | 0-rt   | 24       | -                   | 0                           |
| 2     | $\text{NaBH}_4$                       | -               | 5      | THF                      | 0-rt   | 12       | 1:5                 | 100 (93)                    |
| 3     | $\text{Bu}_4\text{NBH}_4$             | -               | 5      | THF                      | 0-rt   | 24       | 1:5                 | 100 (98)                    |
| 4     | $\text{NaBH}_4$                       | $\text{CeCl}_3$ | 5, 1.2 | THF                      | 0-rt   | 24       | 1:2                 | 100 (88)                    |
| 5     | $\text{Me}_4\text{NBH}(\text{OAc})_3$ | AcOH            | 6, 6   | PhH                      | rt     | 24       | 3.1:1               | 100 (95)                    |
| 6     | $\text{Me}_4\text{NBH}(\text{OAc})_3$ | AcOH            | 6, 6   | PhMe                     | rt     | 24       | 4:1                 | 100 (95)                    |
| 7     | $\text{Me}_4\text{NBH}(\text{OAc})_3$ | AcOH            | 6, 6   | $\text{PhCF}_3$          | rt     | 24       | 5:1                 | 100 (95)                    |
| 8     | $\text{Me}_4\text{NBH}(\text{OAc})_3$ | AcOH            | 6, 6   | $\text{CH}_2\text{Cl}_2$ | rt     | 24       | 4:1                 | 100 (95)                    |
| 9     | $\text{NaBH}(\text{OAc})_3$           | AcOH            | 6, 6   | $\text{PhCF}_3$          | rt     | 24       | 10:1                | 100 (95)                    |

[a] Determined by  $^1\text{H}$  NMR; [b] Based on crude  $^1\text{H}$  NMR analysis; isolated yields are in parentheses.

**General Procedure A (Entries 1 through 4):** A dry flask was charged with a stir bar and hydrated aglain **8a** (20 mg, 0.039 mmol, 1 equiv.) under argon, which was then dissolved in the corresponding solvent (2 mL). The resulting solution was then chilled to 0 °C, and the corresponding additive ( $\text{CeCl}_3 \cdot 7\text{H}_2\text{O}$ , 17 mg, 0.0468 mmol, 1.2 equiv.) and reducing agent (0.195 mmol, 5 equiv.) were sequentially added in one portion. The reaction was warmed gradually to rt and stirred for the designated time. The reaction was quenched with saturated ammonium chloride, and ethyl acetate (1 mL) and water (0.5 mL) were added. The organic phase was then extracted with EtOAc (2 X 10 mL), washed with brine, and dried over sodium sulfate. The filtrate was concentrated in vacuo and purified by column chromatography to give the corresponding products (**9a** eluted at 5:95 EtOAc/ $\text{CH}_2\text{Cl}_2$ , **10a** at 10:90 EtOAc/ $\text{CH}_2\text{Cl}_2$ ).

**General Procedure B (Entries 5 through 9):** A dry flask was charged with a stir bar, reducing agent (0.24 mmol, 6 equiv.), acetic acid (13  $\mu\text{L}$ , 0.24 mmol, 6 equiv.), and solvent (1.5 mL) at rt under argon. The

mixture was then sonicated briefly and stirred at rt for 10 min. The hydrated aglain **8a** (20 mg, 0.039 mmol, 1.0 equiv) was then added at rt in one portion under argon. The resulting mixture was then stirred for 24 h and was quenched with saturated ammonium chloride. Entries 5 and 6 were extracted with EtOAc, washed with saturated sodium bicarbonate and brine, and dried over sodium sulfate. Entries 7 through 9 were extracted with CH<sub>2</sub>Cl<sub>2</sub>, washed with saturated sodium bicarbonate, and dried over sodium sulfate. The filtrate was concentrated in vacuo and <sup>1</sup>H NMR analysis of the crude extract was taken. Column chromatography was used to purify the compounds (**9a** eluted at 5:95 EtOAc/CH<sub>2</sub>Cl<sub>2</sub>, **10a** at 10:90 EtOAc/CH<sub>2</sub>Cl<sub>2</sub>).

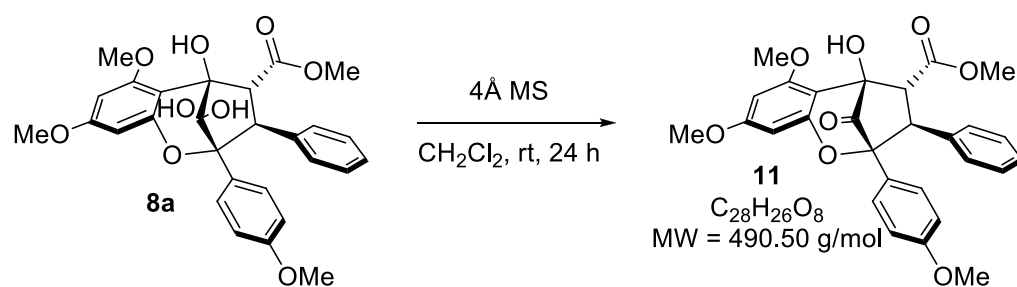

**Procedure for Converting Hydrated-Aglain **8a** to ketone form **11**:** A dry flask was charged with a stir bar, hydrated-aglain **8a** (60

mg, 0.12 mmol, 1.0 equiv.), and 4Å molecular sieves (750 mg) in CH<sub>2</sub>Cl<sub>2</sub> (5 mL) under argon. The mixture was stirred for 24 h at room temperature, and formation of the ketone was monitored by <sup>1</sup>H NMR. The sieves were filtered using a plug of Celite, and the filtrate was concentrated *in vacuo* to afford the ketone **11** without any purification (58 mg, 0.12 mmol, 100%). White solid; *R<sub>f</sub>* = 0.42 (3:2 EtOAc/hexanes); **m.p.** 88 °C; **IR** *v*<sub>max</sub> (film): 3496, 3018, 2952, 2840, 1784, 1734, 1616, 1589, 1517, 1495, 1456, 1437, 1337, 1298, 1253, 1216, 1201, 1161, 1146, 1092, 820, 748 cm<sup>-1</sup>; **<sup>1</sup>H NMR** (500 MHz, CDCl<sub>3</sub>) δ 7.26 (d, *J* = 9.2 Hz, 2H), 7.03 (br dd, *J* = 7.5, 6.5 Hz, 2H), 7.00 (t, *J* = 7.5 Hz, 1H), 6.85 (d, *J* = 6.5 Hz, 2H), 6.64 (d, *J* = 9.2 Hz, 2H), 6.19 (d, *J* = 2.5 Hz, 1H), 6.13 (d, *J* = 2.5 Hz, 1H), 5.80 (s, 1H), 4.50 (d, *J* = 9.0 Hz, 1H), 3.85 (s, 3H), 3.77 (s, 3H), 3.67 (s, 3H), 3.64 (s, 3H), 3.59 (d, *J* = 9.0 Hz, 1H); **<sup>13</sup>C NMR** (125 MHz, CDCl<sub>3</sub>) δ 205.5, 170.8, 162.1, 158.9, 158.2, 153.1, 138.3, 129.0 (2C), 128.9 (2C), 128.3 (2C), 127.1, 125.7, 112.9 (2C), 105.0, 94.6, 93.7, 83.9, 81.0, 57.7, 56.3, 55.6, 55.2, 53.5, 52.4; **HR-MS**: *m/z* Calcd for [C<sub>28</sub>H<sub>26</sub>O<sub>8</sub>+Na]<sup>+</sup> 513.1525, found 513.1529 (+0.8 ppm).

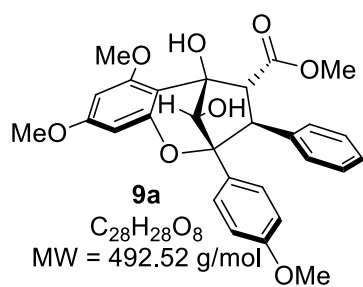

Compound **9a** was prepared and purified according to **general procedure B** from **Table SI-1**, Entry 9 listed above. White solid; *R<sub>f</sub>* = 0.88 (1:9 EtOAc/CH<sub>2</sub>Cl<sub>2</sub>); **m.p.** 206-209 °C; **IR** *v*<sub>max</sub> (film): 3427, 2952, 1729, 1617, 1516, 1456, 1250, 1214, 1186, 1148, 1120, 1079, 831, 752 cm<sup>-1</sup>; **<sup>1</sup>H NMR** (400 MHz, CDCl<sub>3</sub>) δ 7.41 (d, *J* = 9.0 Hz, 2H), 7.23 (d, *J* = 6.8, 2H), 7.05 (dd, *J* = 6.8, 6.8 Hz, 2H), 7.01 (br t, *J* = 6.8 Hz, 1H), 6.67 (d, *J* = 9.0 Hz, 2H), 6.09

(d,  $J = 2.4$  Hz, 1H), 6.07 (d,  $J = 2.4$  Hz, 1H), 5.63 (s, 1H), 4.78 (s, 1H), 4.37 (d,  $J = 9.2$  Hz, 1H), 3.85 (s, 3H), 3.79 (d,  $J = 9.2$  Hz, 1H), 3.73 (s, 3H), 3.70 (s, 3H), 3.60 (s, 3H), 3.35 (s, 1H);  $^{13}\text{C}$  NMR (125 MHz,  $\text{CDCl}_3$ )  $\delta$  172.3, 161.3, 158.8, 157.9, 153.8, 141.6, 130.3 (2C), 130.2 (2C), 129.9, 128.1 (2C), 126.3, 113.0 (2C), 104.7, 94.4, 92.5, 89.1, 80.5, 79.2, 65.2, 56.8, 56.0, 55.4, 55.2, 51.8; **HR-MS**:  $m/z$  Calcd for  $[\text{C}_{28}\text{H}_{28}\text{O}_8 + \text{Na}]^+$  515.1682, found 515.1699 (+3.3 ppm).

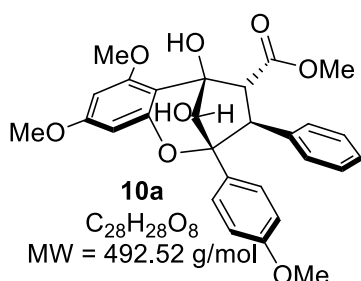

Compound **10a** was prepared and purified according to **general procedure A** from **Table SI-1**, Entry 3 listed above. White solid;  $R_f = 0.41$  (1:9 EtOAc/ $\text{CH}_2\text{Cl}_2$ ); **m.p.** 200+ °C, decomposition observed; **IR**  $\nu_{\text{max}}$  (film): 3476, 2952, 1792, 1732, 1617, 1589, 1516, 1438, 1235, 1095, 737  $\text{cm}^{-1}$ ;  $^1\text{H}$  NMR (500 MHz,  $\text{CDCl}_3$ )  $\delta$  7.28 (d,  $J = 8.8$  Hz, 2H), 7.02 (dd,  $J = 7.5, 7.2$  Hz, 2H), 6.96 (br t,  $J = 7.2$  Hz, 1H), 6.66 (d,  $J = 8.8$  Hz, 2H), 6.23 (d,  $J = 2.2$  Hz, 1H), 6.12 (d,  $J = 2.2$  Hz, 1H), 5.88 (s, 1H), 4.82 (d,  $J = 6.2$  Hz, 1H), 4.10 (d,  $J = 9.0$  Hz, 1H), 3.86 (s, 3H), 3.77 (s, 3H), 3.68 (s, 3H), 3.59 (s, 3H), 3.33 (d,  $J = 9.0$  Hz, 1H), 2.39 (d,  $J = 6.2$  Hz, 1H);  $^{13}\text{C}$  NMR (100 MHz,  $\text{CDCl}_3$ )  $\delta$  171.3, 161.2, 159.4, 158.9, 154.0, 139.9, 129.31 (2C), 129.27, 128.7 (2C), 128.2 (2C), 126.6, 113.3 (2C), 102.4, 94.4, 93.0, 87.4, 80.2, 73.7, 62.0, 56.0, 55.5, 55.2, 54.7, 51.9; **HR-MS**:  $m/z$  Calcd for  $[\text{C}_{28}\text{H}_{28}\text{O}_8 + \text{H}]^+$  493.1862, found 493.1861 (-0.2 ppm).

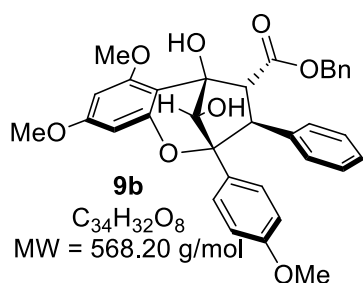

Compound **9b** was prepared and purified according to **general procedure B** listed above ( $\text{NaBH}(\text{OAc})_3$ , dr 10:1, 92% **9b**). White solid;  $R_f = 0.70$  (1:1 EtOAc/hexanes); **m.p.** 90-96 °C; **IR**  $\nu_{\text{max}}$  (film): 3517, 3478, 3015, 1736, 1616, 1588, 1519, 1464, 1341, 1257, 1217, 1202, 1179, 1129, 1094, 1036, 980, 948, 824, 750  $\text{cm}^{-1}$ ;  $^1\text{H}$  NMR (500 MHz,  $\text{CDCl}_3$ )  $\delta$  7.42 (d,  $J = 8.5$  Hz, 2H), 7.35-7.29 (overlapping m, 1H), 7.33 (d,  $J = 7.0$  Hz, 2H), 7.26-7.23 (ovrlp m, 4H), 7.06 (dd,  $J = 7.0, 7.0$  Hz, 2H), 7.02 (t,  $J = 7.0$  Hz, 1H), 6.67 (d,  $J = 8.5$  Hz, 2H), 6.10 (d,  $J = 2.0$  Hz, 1H), 6.01 (d,  $J = 2.0$  Hz, 1H), 5.72 (s, 1H), 5.07 (d,  $J = 12.8$  Hz, 1H), 4.96 (d,  $J = 12.8$  Hz, 1H), 4.79 (s, 1H), 4.42 (d,  $J = 9.0$  Hz, 1H), 3.89 (d,  $J = 9.0$  Hz, 1H), 3.74 (s, 3H), 3.70 (s, 3H), 3.58 (s, 3H), 3.42 (s, 1H);  $^{13}\text{C}$  NMR (125 MHz,  $\text{CDCl}_3$ )  $\delta$  171.8, 161.4, 158.9, 158.0, 153.9, 141.6, 136.0, 130.3 (4C), 129.9, 128.7 (2C), 128.12, 128.10, 127.7 (2C), 126.3, 113.0 (2C), 104.7, 94.5, 92.6, 89.2, 80.6, 79.3, 66.5, 65.4, 56.9, 55.8, 55.5, 55.2; **HR-MS**:  $m/z$  Calcd for  $[\text{C}_{34}\text{H}_{32}\text{O}_8 + \text{Na}]^+$  591.1995, found 591.1981 (-2.4 ppm).

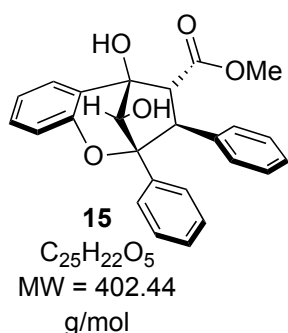

Compound **15** was prepared and purified according to **general procedure B** listed above ( $\text{NaBH}(\text{OAc})_3$ , dr 8:1, 90%). White solid;  $R_f = 0.49$  (1:1 EtOAc/hexanes); **m.p.** 220+ °C decomposition observed; **IR**  $\nu_{\text{max}}$  (film): 3458, 3034, 1701, 1608,

1586, 1499, 1482, 1456, 1435, 1277, 1236, 1181, 1153, 1080, 1061, 1034, 1014, 993, 961  $\text{cm}^{-1}$ ;  $^1\text{H NMR}$  (400 MHz,  $(\text{CD}_3)_2\text{SO}$ )  $\delta$  7.45 (dd,  $J = 7.4, 1.4$  Hz, 2H), 7.31 (br d,  $J = 7.4$  Hz, 1H), 7.24 (d,  $J = 7.4$  Hz, 2H), 7.17-6.95 (ovrlp m, 8H), 6.88 (dd,  $J = 7.4$  Hz, 1H), 6.72 (d,  $J = 7.4$  Hz, 1H), 6.46 (d,  $J = 4.2$  Hz, 1H), 5.99 (s, 1H), 4.51 (d,  $J = 4.2$  Hz, 1H), 4.27 (d,  $J = 8.6$  Hz, 1H), 3.71 (d,  $J = 8.6$  Hz, 1H), 3.44 (s, 3H);  $^{13}\text{C NMR}$  (100 MHz,  $(\text{CD}_3)_2\text{SO}$ )  $\delta$  171.7, 151.4, 142.0, 138.4, 129.9 (2C), 128.94 (2C), 128.87, 127.7 (2C), 127.3, 127.0 (3C), 126.0, 124.7, 120.0, 114.9, 89.0, 79.3, 77.0, 64.0, 56.6, 51.4; **HR-MS**:  $m/z$  Calcd for  $[\text{C}_{25}\text{H}_{22}\text{O}_5-\text{H}_2\text{O}]^+$  385.1440, found 385.1456 (+ 4.2 ppm).

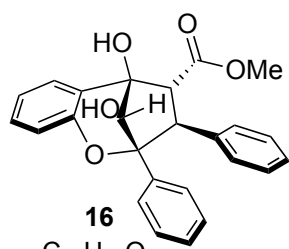

**16**  
 $\text{C}_{25}\text{H}_{22}\text{O}_5$   
 MW = 402.44 g/mol

Compound **16** was prepared and purified according to **general procedure A** listed above ( $\text{Bu}_4\text{NBH}_4$ , dr 7:1, 73%). White solid;  $R_f = 0.27$  (1:1 EtOAc/hexanes); **m.p.** 77  $^\circ\text{C}$ ; **IR**  $\nu_{\text{max}}$  (film): 3452, 3060, 3033, 2940, 1736, 1608, 1584, 1483, 1452, 1210, 905  $\text{cm}^{-1}$ ;  $^1\text{H NMR}$  (400 MHz,  $\text{CDCl}_3$ )  $\delta$  7.38 (ovrlp d,  $J = 7.2$  Hz, 3H), 7.28 (ddd,  $J = 8.0, 8.0, 1.2$  Hz, 1H), 7.17-6.95 (ovrlp m, 10H), 4.93 (d,  $J = 8.2$  Hz, 1H), 4.19 (d,  $J = 9.0$  Hz, 1H), 3.65 (s, 1H), 3.57 (s, 3H), 3.47 (d,  $J = 9.0$  Hz, 1H), 2.38 (d,  $J = 8.2$  Hz, 1H);  $^{13}\text{C NMR}$  (125 MHz,  $\text{CDCl}_3$ )  $\delta$  170.7, 151.7, 139.6, 136.7, 130.1, 129.2 (2C), 128.2 (2C), 127.91 (2C), 127.85, 127.3 (2C), 126.8, 126.0, 123.7, 121.5, 116.3, 88.2, 78.2, 73.9, 60.0, 54.5, 52.5; **HR-MS**:  $m/z$  Calcd for  $[\text{C}_{25}\text{H}_{22}\text{O}_5+\text{Na}]^+$  425.1365, found 425.1355 (- 2.3522 ppm).

### 3. Transesterification and Ester-Amide Exchange Protocols

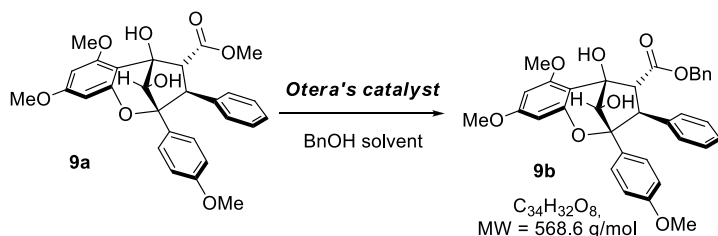

**Protocol for transesterification of ( $\pm$ )-9a to ( $\pm$ )-9b:** To a solution of aglain methyl ester ( $\pm$ )-**9a** (25 mg, 0.05 mmol, 1 equiv.) in toluene (1.0 mL), benzyl alcohol (520  $\mu\text{L}$ , 5.0 mmol, 100 equiv.) and Otera's catalyst ( $\text{C}_{36}\text{H}_{72}\text{N}_4\text{O}_2\text{S}_4\text{Sn}_4$ , 12 mg, 0.01

mmol, 0.2 equiv.) were added under argon at room temperature. The resulting slurry was then heated at 110  $^\circ\text{C}$  under house vacuum for 24 h. The resulting yellow solution was distilled under high vacuum to remove excess benzyl alcohol and afford the crude product as an oil. The crude material was purified by flash chromatography using a gradient EtOAc/hexanes 20:80 to 60:40 affording the corresponding pure aglain **9b** as a white solid (18 mg, 0.032 mmol, 64%) along with recovered starting aglain **9a** (7 mg, 0.014 mmol, 28%).  $R_f = 0.70$  (1:1 EtOAc/hexanes); Other spectroscopic data of compound **9b** are listed above.

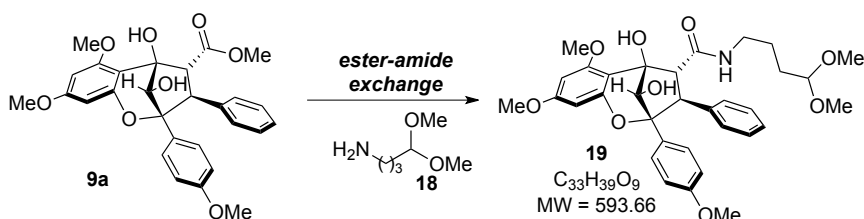

**Ester-amide exchange protocol to access amido acetal ( $\pm$ )-19.** To a solution of amine **18** (637 mg, 4.78 mmol, 20 equiv.) in toluene (1.0 mL)

under argon and at rt was added dropwise a solution of trimethylaluminum [2M] (2.4 mL, 4.79 mmol, 20 equiv.). The resulting solution was heated at 40 °C for 1 h to preform the corresponding dimethylaluminum amide. Then a solution of aglain methyl ester ( $\pm$ )-**9a** (110 mg, 0.223 mmol, 1 equiv.) in toluene (6.5 mL) was added *via* cannula, and the reaction mixture was heated at 70 °C for 12 h. The reaction mixture was quenched at 0 °C with saturated ammonium chloride (4 mL), stirred for 1 h, then extracted with EtOAc (3 X 10 mL). The combined organic layers were washed with brine, dried over Na<sub>2</sub>SO<sub>4</sub>, and filtered. The solvent was removed *in vacuo* to afford a crude white yellow solid. Purification *via* flash chromatography using a gradient of EtOAc/hexanes 1:4 to 4:1 afforded accordingly the corresponding pure amide ( $\pm$ )-**19** (97 mg, 0.163 mmol, 73%). White solid;  $R_f$  = 0.22 (EtOAc/hexanes 4:1); **m.p.** 98 °C; **IR**  $\nu_{\text{max}}$  (film): 3405, 2941, 2837, 1661, 1617, 1589, 1517, 1467, 1439, 1252, 1214, 1201, 1183, 1148, 1129, 1075, 830, 752 cm<sup>-1</sup>; **<sup>1</sup>H NMR** (500 MHz, CDCl<sub>3</sub>)  $\delta$  7.40 (d,  $J$  = 9.0 Hz, 2H), 7.22 (d,  $J$  = 7.2 Hz, 2H), 7.03 (br dd,  $J$  = 7.2, 7.2 Hz, 2H), 6.97 (br t,  $J$  = 7.2 Hz, 1H), 6.67 (d,  $J$  = 9.0 Hz, 2H), 6.08 (d,  $J$  = 2.2 Hz, 1H), 6.06 (d,  $J$  = 2.2 Hz, 1H), 5.90 (s, 1H), 5.74 (br dd,  $J$  = 5.5, 5.5 Hz), 4.75 (s, 1H), 4.48 (br d,  $J$  = 9.0 Hz, 1H), 4.30 (dd,  $J$  = 5.5, 5.5 Hz, 1H), 3.84 (s, 3H), 3.72 (s, 3H), 3.70 (s, 3H), 3.53 (d,  $J$  = 9.0 Hz, 1H), 3.18 (ddd,  $J$  = 13.5, 7.5, 5.5 Hz, 1H) 3.12 (ddd,  $J$  = 13.5, 6.5, 5.5 Hz, 1H), 1.56-1.51 (ovrlp m, 2H), 1.51-1.45 (ovrlp m, 2H); **<sup>13</sup>C NMR** (125 MHz, CDCl<sub>3</sub>)  $\delta$  169.8, 161.2, 158.8, 157.8, 154.0, 142.0, 130.3 (2C), 130.2 (2C), 130.1, 128.0 (2C), 126.1, 113.0 (2C), 104.4, 104.3, 94.7, 92.5, 89.2, 81.0, 79.6, 66.2, 56.1, 55.9, 55.4, 55.2, 53.15, 53.07, 39.5, 30.1, 24.8; **HR-MS**:  $m/z$  Calcd for [C<sub>33</sub>H<sub>39</sub>O<sub>9</sub>+H]<sup>+</sup> 594.2703, found 594.2704 (+0.17 ppm).



## B. General Protocols to Access TADDOL Additives

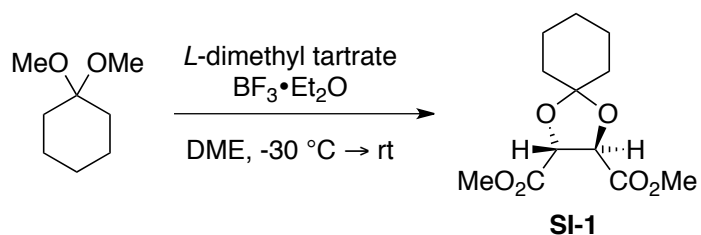

**Preparation of dimethyl 2,3-O-cyclohexylidene-L-tartrate SI-1:** To a solution of L-dimethyl tartrate (9.82 g, 55.1 mmol, 1.5 equiv.) in 1,2-dimethoxyethane (DME) (150 mL) at  $-30\text{ }^\circ\text{C}$  under inert atmosphere was added successively 1,1-

dimethoxycyclohexane (5.3 g, 36.75 mmol, 1.0 equiv.) and  $\text{BF}_3 \cdot \text{Et}_2\text{O}$  (5.45 mL, 44.1 mmol, 1.2 equiv.) dropwise. The resulting mixture was then stirred for 3 h having the temperature raised from  $-30\text{ }^\circ\text{C}$  to RT. The reaction was then cooled to  $0\text{ }^\circ\text{C}$  and carefully quenched with sat. aqueous  $\text{NaHCO}_3$  solution. The organic layer was then separated and the aqueous phase was extracted with EtOAc (3 X 400 mL). The combined organic phases were washed with water (2 X 400 mL) and brine (1 X 400 mL). The combined organic extracts were dried over  $\text{Na}_2\text{SO}_4$ , filtered, and concentrated *in vacuo* to afford a crude oil, which was further purified by flash chromatography (gradient of EtOAc/hexanes 2:98 to 15:85) affording pure **SI-1** as a colorless oil (8.07 g, 31.23 mmol, 85%) which was spectroscopically identical to a previously reported compound.<sup>S1</sup>  $R_f = 0.12$  (EtOAc/hexanes 10:90);  $^1\text{H NMR}$  (500 MHz,  $\text{CDCl}_3$ )  $\delta$  4.73 (s, 2H), 3.74 (s, 6H), 1.60 (m, 8H), 1.33 (m, 2H);  $^{13}\text{C NMR}$  (125 MHz,  $\text{CDCl}_3$ )  $\delta$  (ppm): 170.2 (2C), 114.5, 76.6 (2C), 52.6 (2C), 35.7 (2C), 24.7, 23.6 (2C);  $[\alpha]_D^{20} = -26.9^\circ$  ( $c = 2.00$ ,  $\text{CHCl}_3$ ); literature report<sup>S2</sup>  $[\alpha]_D^{20} = -19.8^\circ$  ( $c = 2.00$ ,  $\text{CHCl}_3$ ).

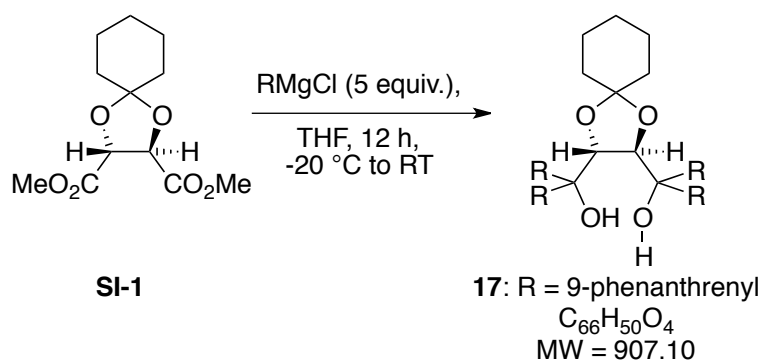

**Grignard addition to produce (R, R)-2,2-cyclohexyl- $\alpha, \alpha, \alpha'$ -tetrakis(phenanthren-9-yl)-1,3-dioxolane-4,5-dimethanol 17.**<sup>S2</sup> A solution of **SI-1** (1.00 g, 3.87 mmol, 1.0 equiv.) in THF (10 mL) was added dropwise to a solution of (phenanthren-9-yl)magnesium bromide (19.4 mmol, 5 equiv., (prepared from

4.98 g of 9-bromophenanthrene and 0.46 g of Mg powder and catalytic amount of iodine in THF (70 mL) at  $-20\text{ }^\circ\text{C}$  under inert atmosphere. The reaction mixture was then stirred at rt for 12 h. The reaction was quenched at  $0\text{ }^\circ\text{C}$  by careful addition of ice and a saturated aqueous  $\text{NH}_4\text{Cl}$  solution. The organic layer was separated and the aqueous layer was extracted with ether (3 X 50 mL). The combined organic extracts were dried over  $\text{Na}_2\text{SO}_4$  and the solvent was removed *in vacuo* to afford a yellow oil. The TADDOL was purified *via* flash chromatography using EtOAc/hexanes (20:80). The white solid was then recrystallized from

<sup>S1</sup> Cuenca, A.; Medio-Simon, M.; Aguilar, G. A.; Weibel, D.; Beck, A. K.; Seebach, D. *Helv. Chim. Acta.* **2000**, *83*, 3153-3162

<sup>S2</sup> Gerard, B.; Jones II, G.; Porco Jr., J. A. *J. Am. Chem. Soc.* **2004**, *126*, 13620-13621

CH<sub>2</sub>Cl<sub>2</sub>/MeOH (10:90), affording pure TADDOL **17** as a white powder (2.036 g, 58%).  $R_f = 0.35$  (CH<sub>2</sub>Cl<sub>2</sub>/hexanes 1:1);  $[\alpha]_D^{20} = +268^\circ$  ( $c = 2.0$ , CHCl<sub>3</sub>); literature report<sup>S2</sup>  $[\alpha]_D^{20} = +79^\circ$  ( $c = 2.0$ , CHCl<sub>3</sub>); **HR-MS**:  $m/z$  Calcd for [C<sub>66</sub>H<sub>50</sub>O<sub>4</sub>+Na]<sup>+</sup> 929.3609, Found 929.3607 (+0.0 ppm). Other spectroscopic data for compound **17** are identical to literature reports.

### C. Compound Characterization Toward (+)-Ponapensin (3) and (+)-Elliptifoline (4)

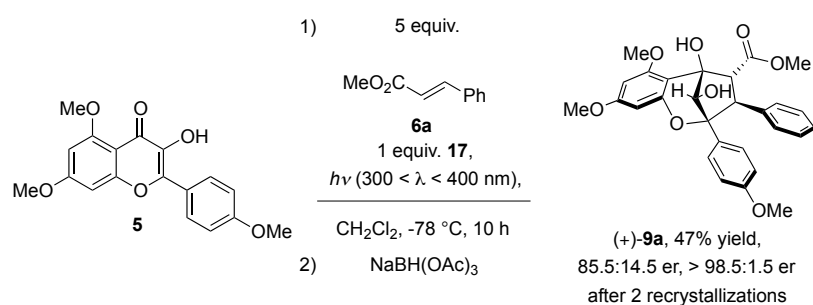

#### Procedure for enantioselective photocycloaddition:

A 16 x 100 mm Pyrex test tube was flame dried under vacuum and then charged with anhydrous 3-hydroxyflavone **5** (dried overnight in vacuum oven) (100 mg, 1.0 equiv., 0.305 mmol, 1.0 equiv.), methyl cinnamate **6a** (247 mg, 5.0 equiv., 1.52 mmol), and TADDOL **17** (276 mg, 0.305 mmol, 1.0 equiv.) in anhydrous CH<sub>2</sub>Cl<sub>2</sub> (0.05 M; 6 mL). After degassing with argon for 10 min, the mixture was stirred and irradiated at -78 °C in the Rayonet RPR-3100 (300 <  $\lambda$  < 400 nm) for 10 h. The solution was concentrated *in vacuo* to afford a brown-yellow oil. Silica gel was washed successively with 80:20:03 hexanes/EtOAc/NEt<sub>3</sub> (one column length) and 80:20 hexanes/EtOAc (one column length) to neutralize acidity. Purification *via* flash chromatography using a gradient of hexanes/EtOAc (80:20 to 30:70) afforded cyclopenta[*bc*]benzopyran **8a**, a light yellow foam, as a mixture of isomers (107 mg, 0.210 mmol, 69%). This mixture of isomers was used without further purification and transformed into the desired reduced 10*S*-aglain **9a** using sodium triacetoxyborohydride (see **general procedure B** for diastereoselective reduction of hydrated aglains). The four diastereomers were separated *via* flash chromatography using a gradient of hexanes/EtOAc (90:10 to 50:50) to afford the desired reduced 10*S* aglain **9a** (49 mg, 0.099 mmol, 47%) which was spectroscopically identical to the racemic compound ( $\pm$ )-**9a** (see above). Enantiopure crystals of **9a** were obtained by slow evaporation from isopropanol (>96:04 er), then another recrystallization by slow evaporation from acetonitrile (>98.6:1.4 er).  $[\alpha]_D^{20} = +136.5^\circ$  ( $c = 1.0$ , CHCl<sub>3</sub>).

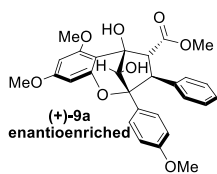

**Analysis of Aglain 9a:** SFC Chiralcel<sup>®</sup>OD-H column (temperature 35 °C) was used with isocratic elution of MeOH (NEt<sub>2</sub> 0.1% / Vol) : CO<sub>2</sub> (08:92) with a flow rate of 1.5 mL/min at 100 bar (CO<sub>2</sub> pressure) for 45 minutes.

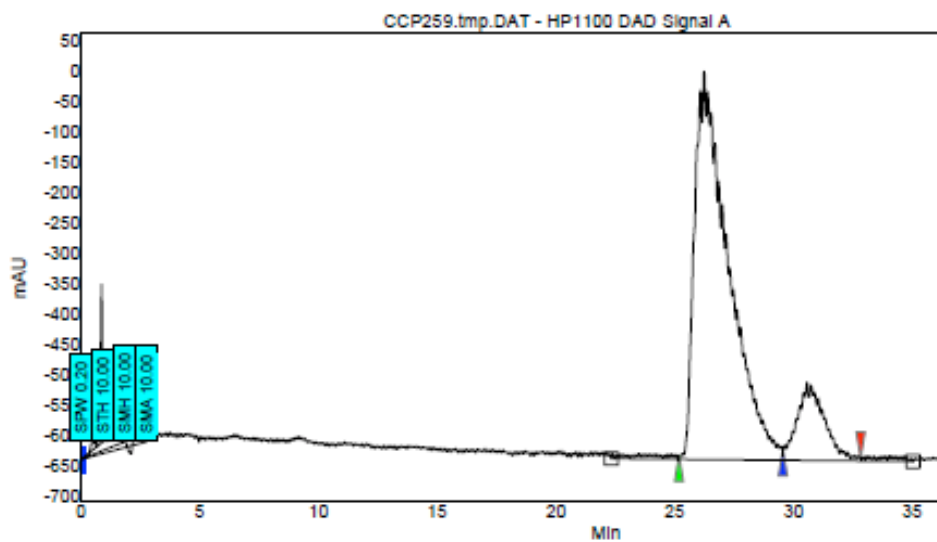

| Index | Name    | Start Time [Min] | End [Min] | RT Offset [Min] | Quantity [% Area] | Height [μV] | Area [μV.Min] | Area [%] |         |
|-------|---------|------------------|-----------|-----------------|-------------------|-------------|---------------|----------|---------|
| 1     | UNKNOWN | 25.17            | 26.23     | 29.55           | 0.00              | 86.19       | 639.8         | 1049.5   | 86.187  |
| 2     | UNKNOWN | 29.55            | 30.57     | 32.82           | 0.00              | 13.81       | 128.9         | 168.2    | 13.813  |
| Total |         |                  |           |                 |                   | 100.00      | 768.7         | 1217.7   | 100.000 |

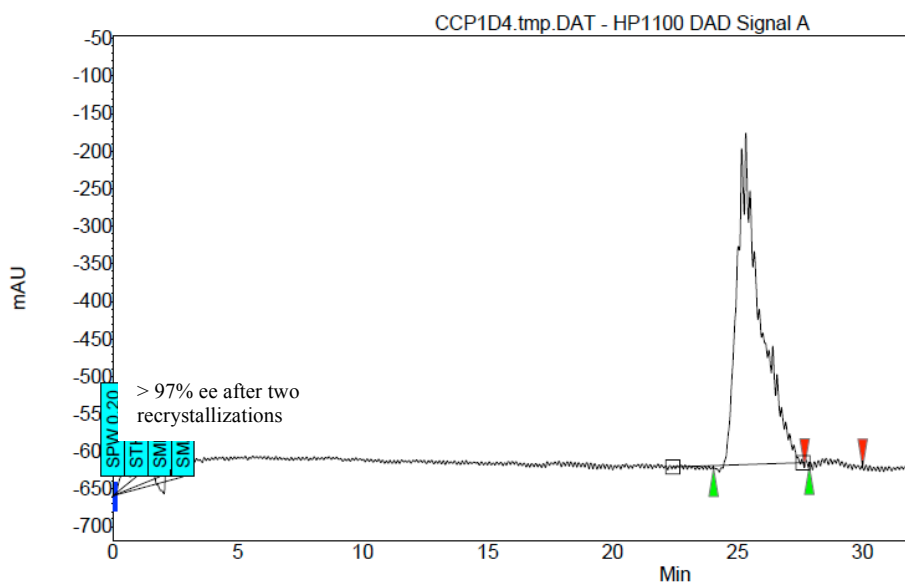

| Index | Name    | Start Time [Min] | Time [Min] | End [Min] | RT Offset [Min] | Quantity [% Area] | Height [μV] | Area [μV.Min] | Area [%] |
|-------|---------|------------------|------------|-----------|-----------------|-------------------|-------------|---------------|----------|
| 1     | UNKNOWN | 24.04            | 25.33      | 27.68     | 0.00            | 98.61             | 441.4       | 469.3         | 98.614   |
| 2     | UNKNOWN | 27.87            | 29.59      | 30.00     | 0.00            | 1.39              | 11.6        | 6.6           | 1.386    |
| Total |         |                  |            |           |                 | 100.00            | 453.0       | 475.9         | 100.000  |

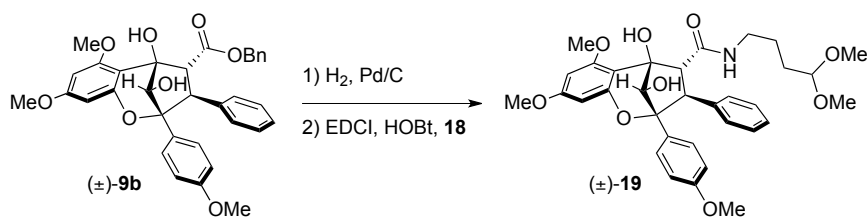

**Procedure for the amidation of 9b to produce (±)-19 (2 steps):**

A dry flask was charged with **9b** (70 mg, 0.124 mmol, 1.0 equiv.) and a stir bar. **9b** was then dissolved in a CHCl<sub>3</sub>/EtOH (1:3, 12 mL). 10% Pd on carbon (14 mg, 0.013 mmol, 0.1 equiv.) was then added, and the mixture was stirred. The reaction vessel was then purged with H<sub>2</sub> gas using a balloon filled with H<sub>2</sub> and a vacuum manifold. The reaction was stirred under H<sub>2</sub> for 1 h, and then purged/charged with argon. The Pd/C was filtered using a Celite plug, and the filtrate was concentrated *in vacuo* to produce the crude carboxylic acid (58 mg, 100%) which was used in the next reaction without further purification. A flask was charged with the carboxylic acid (58 mg, 1.0 equiv., 0.124 mmol), EDCI (35 mg, 0.182 mmol, 1.5 equiv.), HOBT•H<sub>2</sub>O (22 mg, 0.146 mmol, 1.2 equiv.), and a stir bar. The contents were then dissolved in CH<sub>2</sub>Cl<sub>2</sub> (3.5 mL). A solution of amine **18** (49 mg, 0.365 mmol, 3.0 equiv.) in CH<sub>2</sub>Cl<sub>2</sub> (1 mL) was added to the reaction vessel at 0 °C under argon. The reaction was then brought to rt and stirred for 16 h. Water (10 mL) and CH<sub>2</sub>Cl<sub>2</sub> (10 mL) were added and the organic layer was extracted with CH<sub>2</sub>Cl<sub>2</sub> (3 X 10 mL). Brine was used to aid separation of the layers. The combined organic extracts were dried over sodium sulfate and purified *via* flash chromatography (product eluted with 8:2 EtOAc/hexanes, 51 mg, 71% yield). White solid; *R<sub>f</sub>* = 0.22 (4:1 EtOAc/hexanes); **m.p.** 98 °C; **IR** *v*<sub>max</sub> (film): 3405, 2941, 2837, 1661, 1617, 1589, 1517, 1467, 1439, 1252, 1214, 1201, 1183, 1148, 1129, 1075, 830, 752 cm<sup>-1</sup>; **<sup>1</sup>H NMR** (500 MHz, CDCl<sub>3</sub>) δ 7.40 (d, *J* = 9.0 Hz, 2H), 7.22 (d, *J* = 7.2 Hz, 2H), 7.03 (br dd, *J* = 7.2, 7.2 Hz, 2H), 6.97 (br t, *J* = 7.2 Hz, 1H), 6.67 (d, *J* = 9.0 Hz, 2H), 6.08 (d, *J* = 2.2 Hz, 1H), 6.06 (d, *J* = 2.2 Hz, 1H), 5.90 (s, 1H), 5.74 (br dd, *J* = 5.5, 5.5 Hz), 4.75 (s, 1H), 4.48 (br d, *J* = 9.0 Hz, 1H), 4.30 (dd, *J* = 5.5, 5.5 Hz, 1H), 3.84 (s, 3H), 3.72 (s, 3H), 3.70 (s, 3H), 3.53 (d, *J* = 9.0 Hz, 1H), 3.18 (ddd, *J* = 13.5, 7.5, 5.5 Hz, 1H) 3.12 (ddd, *J* = 13.5, 6.5, 5.5 Hz, 1H), 1.56-1.51 (ovrlp m, 2H), 1.51-1.45 (ovrlp m, 2H); **<sup>13</sup>C NMR** (125 MHz, CDCl<sub>3</sub>) δ 169.8, 161.2, 158.8, 157.8, 154.0, 142.0, 130.3 (2C), 130.2 (2C), 130.1, 128.0 (2C), 126.1, 113.0 (2C), 104.4, 104.3, 94.7, 92.5, 89.2, 81.0, 79.6, 66.2, 56.1, 55.9, 55.4, 55.2, 53.15, 53.07, 39.5, 30.1, 24.8; **HR-MS**: *m/z* Calcd for [C<sub>33</sub>H<sub>39</sub>O<sub>9</sub>+H]<sup>+</sup> 594.2703, found 594.2704 (+0.17 ppm).

**Analysis of (±)-19:** SFC Chiralcel<sup>®</sup>OD-H column (temperature 35 °C) was used with an elution of MeOH (NEt<sub>2</sub> 0.1% / Vol) : CO<sub>2</sub> with a flow of 2.5 mL/min at 100 bar (CO<sub>2</sub> pressure): isocratic 05:95 (3 min) then ramped from 05:95 to 20:80 over 43 min (rate: 0.35). T<sub>1</sub> = 25.7 min, T<sub>2</sub> = 32.4 min.

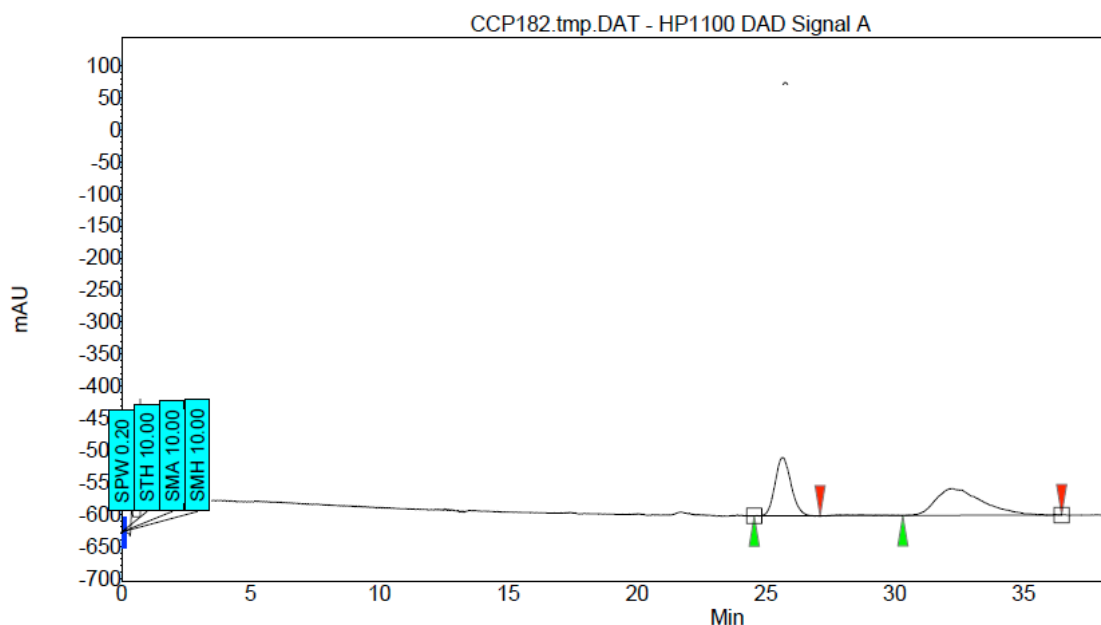

| Index | Name    | Start | Time  | End   | RT Offset | Quantity | Height     | Area           | Area    |
|-------|---------|-------|-------|-------|-----------|----------|------------|----------------|---------|
|       |         | [Min] | [Min] | [Min] | [Min]     | [% Area] | [ $\mu$ V] | [ $\mu$ V.Min] | [%]     |
| 1     | UNKNOWN | 24.65 | 25.72 | 27.21 | 0.00      | 42.57    | 90.6       | 64.9           | 42.567  |
| 2     | UNKNOWN | 30.42 | 32.37 | 36.58 | 0.00      | 57.43    | 41.7       | 87.5           | 57.433  |
| Total |         |       |       |       |           | 100.00   | 132.3      | 152.4          | 100.000 |

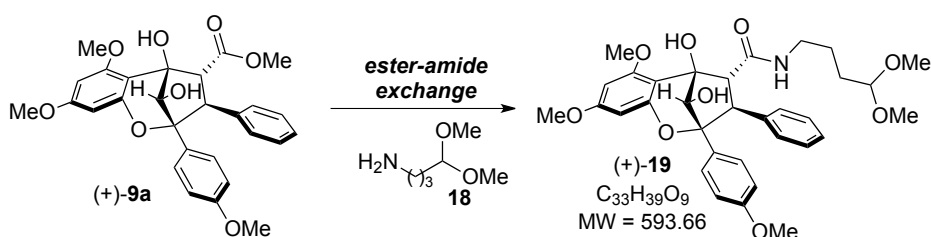

**Ester-amide exchange protocol to access aglain-amide (+)-19.** To a solution of amine **18** (637 mg, 4.78 mmol, 20 equiv.) in toluene (1.0 mL) under argon and at room

temperature was added dropwise a solution of trimethylaluminum [2M] (2.4 mL, 4.79 mmol, 20 equiv.). The resulting solution was heated at 40 °C for 1 h to preform the corresponding aluminate. Then a solution of aglain methyl ester (+)-**9a** (110 mg, 0.223 mmol, 1 equiv.) in toluene (6.5 mL) was added *via* cannula, and the reaction mixture was heated at 70 °C for 12 h. The reaction mixture was quenched at room temperature with a solution of NH<sub>4</sub>Cl sat. (4 mL), stirred for 30 min, extracted with EtOAc (3 X 10 mL), and the combined organic layers washed with brine. The organic layer was dried over Na<sub>2</sub>SO<sub>4</sub>, the solvent was removed *in vacuo* to afford a crude white yellow solid. Purification *via* flash chromatography using a gradient of EtOAc/hexanes 1:4 to 4:1 afforded pure amide (+)-**19** (85 mg, 0.143 mmol, 64%) along with recovered starting material (+)-**9a** (5 mg, 0.010 mmol, 5%). White solid; *R<sub>f</sub>* = 0.22 (EtOAc/hexanes 4:1);

$[\alpha]_D^{20} = +94.8^\circ$  ( $c = 1.0$ ,  $\text{CHCl}_3$ ); Other spectroscopic data of compound (+)-**19** are identical to its racemate (see above).

**Analysis of enantioenriched (+)-19:** SFC Chiralcel<sup>®</sup> OD-H column (temperature 35 °C) was used with an elution of MeOH ( $\text{NEt}_3$  0.1% / Vol) :  $\text{CO}_2$  with a flow rate of 2.5 mL/min at 100 bar ( $\text{CO}_2$  pressure): isocratic 05:95 (3 min) then ramped from 05:95 to 20:80 over 43 min (rate: 0.35).  $T_1 = 25.7$  min,  $T_2 = 31.1$  min.

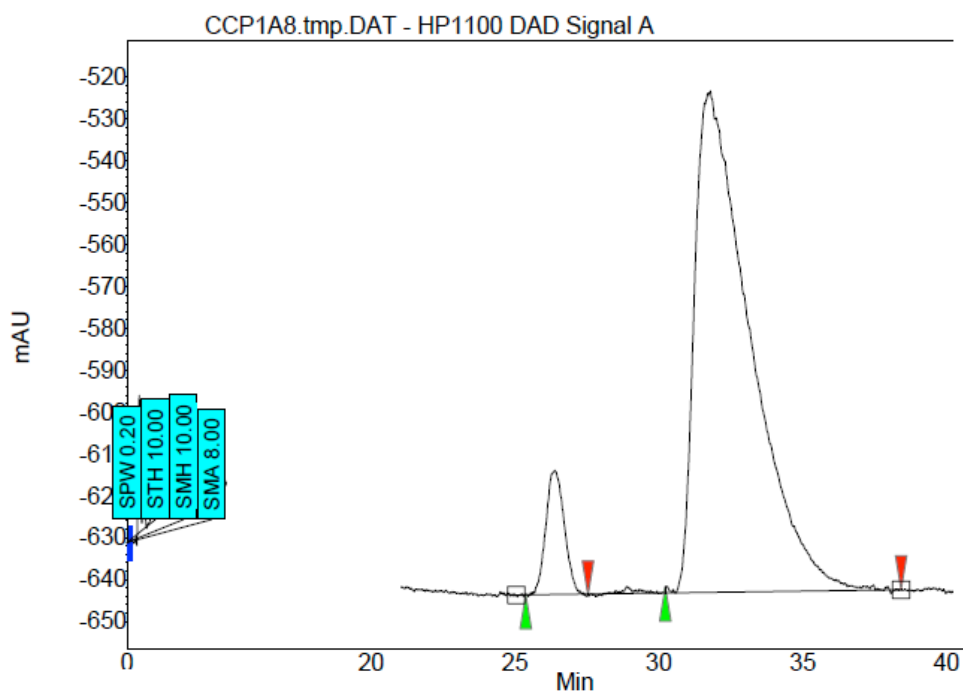

| Index | Name    | Start [Min] | Time [Min] | End [Min] | RT Offset [Min] | Quantity [% Area] | Height [ $\mu\text{V}$ ] | Area [ $\mu\text{V}\cdot\text{Min}$ ] | Area [%] |
|-------|---------|-------------|------------|-----------|-----------------|-------------------|--------------------------|---------------------------------------|----------|
| 1     | UNKNOWN | 24.65       | 25.66      | 26.81     | 0.00            | 3.92              | 29.6                     | 10.9                                  | 3.923    |
| 2     | UNKNOWN | 29.50       | 31.07      | 37.70     | 0.00            | 96.08             | 119.7                    | 266.3                                 | 96.077   |
| Total |         |             |            |           |                 | 100.00            | 149.3                    | 277.2                                 | 100.000  |

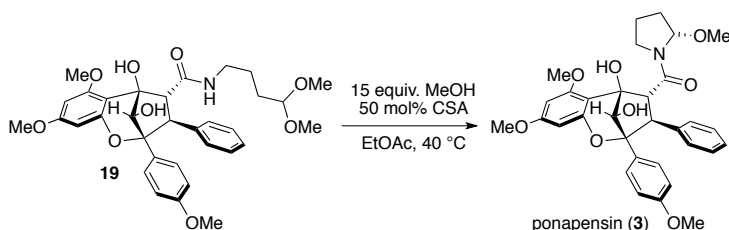

**Procedure to prepare (+)-ponapensin (3):** A dry flask was charged with aglain amide (+)-**19** (53 mg, 0.090 mmol, 1.0 equiv.) and a stir bar under argon. (+)-**19** was dissolved in EtOAc (9.0 mL) and chilled to 0 °C. Under argon, CSA (10.4 mg, 0.045

mmol, 0.5 equiv.) and MeOH (54  $\mu\text{L}$ , 1.34 mmol, 15 equiv) were added, and the reaction was warmed up to rt, then heated at 40 °C for 2 h. Triethylamine (7  $\mu\text{L}$ , 0.045 mmol, 0.5 equiv.) was added and stirred for 30 min.

Water (2 mL) was added to the reaction, and the organic layer was separated and dried over sodium sulfate. The organic extract was concentrated and purified using preparative TLC (49:1 CHCl<sub>3</sub>/MeOH) using a TLC plate that was neutralized with MeOH/triethylamine (99:1). Compound **3** was isolated (34 mg, 0.062 mmol, 68%) as a white solid. The reaction of (±)-**19** to (±)-**3** was reacted and purified in the exact same fashion and was crystallized *via* slow evaporation in benzene (600 μL) and hexanes (100 μL). White solid;  $R_f = 0.46$  (1:4 hexanes/EtOAc);  $[\alpha]_D^{20} = +170^\circ$  ( $c = 0.2$ , CHCl<sub>3</sub>); **m.p.** 235-240 °C, decomposition observed; **IR**  $\nu_{\text{max}}$  (film): 3476, 3011, 2935, 2840, 1619, 1591, 1517, 1436, 1251, 1215, 1148, 1128, 1081, 750 cm<sup>-1</sup>; **<sup>1</sup>H NMR** (500 MHz, CD<sub>3</sub>OD)  $\delta$  7.40 (d,  $J = 9.0$  Hz, 2H), 7.18 (br d,  $J = 7.0$  Hz), 7.00-6.91 (m, 3H), 6.61 (d,  $J = 9.0$  Hz, 2H), 6.12 (d,  $J = 2.2$  Hz, 1H), 6.03 (d,  $J = 2.2$  Hz, 1H), 5.80 (br d,  $J = 3.5$  Hz, 1H), 4.62 (br s, 1H), 4.40 (br d,  $J = 9.5$  Hz, 1H), 4.36 (d,  $J = 9.5$  Hz, 1H), 3.78 (s, 3H), 3.73 (s, 3H), 3.67 (s, 3H), 3.34 (m, 2H), 2.80 (s, 3H), 2.04-2.00 (m, 1H), 1.94-1.88 (ovrlp m, 3H); **<sup>13</sup>C NMR** (100 MHz, CDCl<sub>3</sub>)  $\delta$  172.4, 162.7, 160.0, 159.8, 155.0, 143.1, 132.0, 131.7 (2C), 131.4 (2C), 128.6 (2C), 127.0, 113.4 (2C), 107.2, 95.2, 92.8, 90.0, 89.6, 83.1, 80.9, 63.6, 58.5, 56.5, 55.8, 55.4, 54.3, 46.3, 32.7, 21.7; **HR-MS**:  $m/z$  Calcd for [C<sub>32</sub>H<sub>35</sub>NO<sub>8</sub>+Na]<sup>+</sup> 584.2260, found 584.2252 (-1.4 ppm).



**Table SI-2.** Comparison of  $^1\text{H}$  and  $^{13}\text{C}$  spectra for natural and synthetic ponapensin (**3**)

| $^1\text{H}$ Literature <sup>S3</sup> |                        | $^1\text{H}$ Observed |                        | $^{13}\text{C}$ Literature <sup>S3</sup> | $^{13}\text{C}$ Observed |
|---------------------------------------|------------------------|-----------------------|------------------------|------------------------------------------|--------------------------|
| Chemical Shift (ppm)                  | Appearance             | Chemical Shift (ppm)  | Appearance             | Chemical Shift (ppm)                     | Chemical Shift (ppm)     |
| 7.40                                  | d, $J = 8.9$ Hz, 2H    | 7.40                  | d, $J = 9.0$ Hz, 2H    | 172.4                                    | 172.4                    |
| 7.18                                  | d, $J = 6.8$ Hz, 2H    | 7.18                  | br d, $J = 7.0$ Hz, 2H | 162.7                                    | 162.7                    |
| 6.96                                  | m, 3H                  | 6.96                  | m, 3H                  | 160.0                                    | 160.0                    |
| 6.61                                  | d, $J = 8.9$ Hz, 2H    | 6.61                  | d, $J = 9.0$ Hz, 2H    | 159.8                                    | 159.8                    |
| 6.12                                  | d, $J = 2.2$ Hz, 1H    | 6.12                  | d, $J = 2.2$ Hz, 1H    | 155.0                                    | 155.0                    |
| 6.03                                  | d, $J = 2.2$ Hz, 1H    | 6.03                  | d, $J = 2.2$ Hz, 1H    | 143.1                                    | 143.1                    |
| 5.80                                  | br d, $J = 3.3$ Hz, 1H | 5.80                  | br d, $J = 3.5$ Hz, 1H | 132.0                                    | 132.0                    |
| 4.62                                  | s, 1H                  | 4.62                  | br s, 1H               | 131.7 (2C)                               | 131.7 (2C)               |
| 4.40                                  | d, $J = 9.4$ Hz, 1H    | 4.40                  | br d, $J = 9.5$ Hz, 1H | 131.4 (2C)                               | 131.4 (2C)               |
| 4.36                                  | d, $J = 9.4$ Hz, 1H    | 4.36                  | d, $J = 9.5$ Hz, 1H    | 128.6 (2C)                               | 128.6 (2C)               |
| 3.79                                  | s, 3H                  | 3.78                  | s, 3H                  | 127.0                                    | 127.0                    |
| 3.73                                  | s, 3H                  | 3.73                  | s, 3H                  | 113.4 (2C)                               | 113.4 (2C)               |
| 3.67                                  | s, 3H                  | 3.67                  | s, 3H                  | 107.3                                    | 107.2                    |
| 3.34                                  | m, 2H                  | 3.34                  | m, 2H                  | 95.2                                     | 95.2                     |
| 2.80                                  | s, 3H                  | 2.80                  | s, 3H                  | 92.8                                     | 92.8                     |
| 2.02                                  | m, 1H                  | 2.02                  | m, 1H                  | 90.0                                     | 90.0                     |
| 1.90                                  | m, 2H                  | 1.91                  | m, 2H                  | 89.6                                     | 89.6                     |
| 1.88                                  | m, 1H                  | 1.89                  | m, 1H                  | 83.1                                     | 83.1                     |
|                                       |                        |                       |                        | 80.9                                     | 80.9                     |
|                                       |                        |                       |                        | 63.6                                     | 63.6                     |
|                                       |                        |                       |                        | 58.5                                     | 58.5                     |
|                                       |                        |                       |                        | 56.5                                     | 56.5                     |
|                                       |                        |                       |                        | 55.8                                     | 55.8                     |
|                                       |                        |                       |                        | 55.5                                     | 55.4                     |
|                                       |                        |                       |                        | 54.3                                     | 54.3                     |
|                                       |                        |                       |                        | 46.3                                     | 46.3                     |
|                                       |                        |                       |                        | 32.7                                     | 32.7                     |
|                                       |                        |                       |                        | 21.7                                     | 21.7                     |

<sup>S3</sup> Salim, A. A.; Pawlus, A. D.; Chai, H.-B.; Farnsworth, N. R.; Kinghorn, A. D.; Carcache-Blanco, E. J. *Bioorg. Med. Chem. Lett.* **2007**, *17*, 109-112.

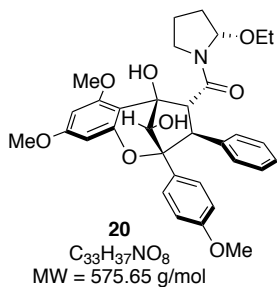

**((3S,4R,5R,10S)-5,10-dihydroxy-6,8-dimethoxy-2-(4-methoxyphenyl)-3-phenyl-2,3,4,5-tetrahydro-2,5-methanobenzo[b]oxepin-4-yl)((S)-2-ethoxypyrrolidin-1-yl)methanone ((±)-20):** Aglain **20** was prepared using the procedure above, except MeOH was not added, and the reaction vessel was sealed. After quenching, the mixture was concentrated and purified using preparative TLC (49:1 CHCl<sub>3</sub>/MeOH) using a TLC plate that was neutralized with a MeOH/triethylamine solution (99:1

MeOH/triethylamine). Fractions from the prep. TLC were further purified using reverse phase preparative HPLC (Gilson PLC2020 system, Waters SunFire™ Prep C18 OBD™ 5μm 19X50 mm column, 20.0 mL/min flow rate, 30:70 MeCN/H<sub>2</sub>O to 80:20 MeCN/H<sub>2</sub>O gradient, 10 min). Ethyl hemiaminal derivative (±)-**20** (6 mg, 12% yield) was isolated as a white solid.  $R_f$  = 0.46 (4:1 EtOAc/hexanes); **m.p.** 195-200 °C; **IR**  $\nu_{max}$  (film): 3468, 2975, 1618, 1590, 1518, 1496, 1457, 1437, 1252, 1214, 1202, 1181, 1148, 1130, 1096, 1080 cm<sup>-1</sup>; **<sup>1</sup>H NMR** (400 MHz, CDCl<sub>3</sub>)  $\delta$  (rotamers observed) 7.42 (d,  $J$  = 9.0 Hz, 2H), 7.17 (d,  $J$  = 7.2 Hz, 2H), 7.00 (dd,  $J$  = 7.2, 7.0 Hz, 2H), 6.95 (t,  $J$  = 7.0 Hz, 1H), 6.68 (d,  $J$  = 9.0 Hz, 2H), 6.10 (d,  $J$  = 2.2 Hz, 1H), 6.04 (d,  $J$  = 2.2 Hz, 1H), 5.69 (d,  $J$  = 4.0 Hz, 1H), 5.66 (s, 1H), 4.82 (s, 1H), 4.61 (d,  $J$  = 9.2 Hz, 1H), 4.22 (d,  $J$  = 9.2 Hz, 1H), 3.78 (s, 3H), 3.72 (s, 3H), 3.70 (s, 3H), 3.46-3.41 (m, 1H), 3.37-3.30 (m, 1H), 3.24 (s, 1H), 2.88 (dt,  $J$  = 14.0, 7.2 Hz, 1H), 2.73 (dt,  $J$  = 14.0, 7.2 Hz, 1H), 2.05-1.93 (ovrlp m, 2H), 1.88-1.74 (ovrlp m, 2H), 0.76 (t,  $J$  = 7.2 Hz, 3H); **<sup>13</sup>C NMR** (100 MHz, CDCl<sub>3</sub>)  $\delta$  169.1, 161.1, 158.8, 157.8, 153.8, 141.9, 130.5 (2C), 130.3, 130.1 (2C), 127.9 (2C), 126.0, 113.1 (2C), 105.1, 94.5, 92.2, 89.2, 86.4, 81.7, 80.1, 63.3, 61.7, 57.1, 56.0, 55.4, 55.2, 45.2, 32.9, 21.0, 15.0; **HR-MS**:  $m/z$  Calcd for [C<sub>33</sub>H<sub>37</sub>NO<sub>8</sub>+Na]<sup>+</sup> 598.2417, found 598.2416 (-0.17 ppm).

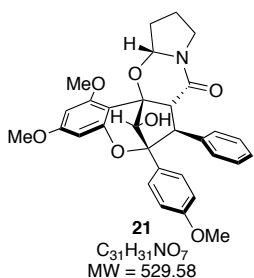

**((4bR,5aR,10aR,11S,14R)-14-hydroxy-2,4-dimethoxy-12-(4-methoxyphenyl)-11-phenyl-5a,6,7,8,11,12-hexahydro-4b,12-methanobenzo[6,7]oxepino[4,5-e]pyrrolo[2,1-b][1,3]oxazin-10(10aH)-one ((±)-21):** Aglain **21** was prepared using the procedure above, except MeOH was not added, and the reaction vessel was sealed. After quenching, the mixture was concentrated and purified using preparative TLC (49:1 CHCl<sub>3</sub>/MeOH) using a TLC plate that was neutralized with a

MeOH/triethylamine solution (99:1 MeOH/triethylamine). Fractions from the prep. TLC were further purified using reverse phase preparative HPLC (Gilson PLC2020 system, Waters SunFire™ Prep C18 OBD™ 5μm 19X50 mm column, 20.0 mL/min flow rate, 30:70 MeCN/H<sub>2</sub>O to 80:20 MeCN/H<sub>2</sub>O gradient, 10 min). Cyclic intermediate (±)-**21** (1.5 mg, 2% yield) was isolated as a white solid.  $R_f$  = 0.46 (4:1 EtOAc/hexanes); **IR**  $\nu_{max}$  (film): 3530, 2962, 1614, 1261, 1091 cm<sup>-1</sup>; **<sup>1</sup>H NMR** (400 MHz, CDCl<sub>3</sub>)  $\delta$  7.37

(d,  $J = 8.8$  Hz, 2H), 7.15 (d,  $J = 7.6$  Hz, 2H), 7.06 (dd,  $J = 7.6, 7.2$  Hz, 2H), 7.00 (t,  $J = 7.2$  Hz, 1H), 6.66 (d,  $J = 8.8$  Hz, 2H), 6.04 (d,  $J = 2.4$  Hz, 1H), 6.01 (d,  $J = 2.4$  Hz, 1H), 5.68 (dd,  $J = 6.4$  Hz, 1H), 4.82 (s, 1H), 4.23 (d,  $J = 10.6$  Hz, 1H), 4.12 (d,  $J = 10.6$  Hz, 1H), 3.75 (s, 3H), 3.714 (s, 3H), 3.708 (s, 3H), 3.57 (brdd,  $J = 10.8, 9.2$  Hz, 1H), 3.42 (ddd,  $J = 10.8, 6.8, 4.4$  Hz, 1H), 2.85 (s, 1H), 2.44 (ddd,  $J = 14.0, 7.6, 6.4$  Hz, 1H), 2.37 (ddd,  $J = 14.0, 7.6, 6.4$  Hz, 1H), 2.13 (dddd,  $J = 13.4, 7.6, 7.2, 4.4$  Hz, 1H), 1.92 (brddd,  $J = 13.4, 9.2, 7.2$  Hz, 1H);  $^{13}\text{C}$  NMR (100 MHz,  $\text{CDCl}_3$ )  $\delta$  167.7, 161.3, 158.9, 158.5, 154.5, 141.2, 130.4 (2C), 130.0 (3C), 128.1 (2C), 126.2, 112.9 (2C), 105.5, 94.1, 93.3, 91.1, 90.7 (2C), 85.8, 60.0, 55.8, 55.4, 55.2, 51.2, 43.6, 31.5, 22.5; **HR-MS**:  $m/z$  Calcd for  $[\text{C}_{31}\text{H}_{31}\text{NO}_7+\text{H}]^+$  530.2179, found 530.2164 (+2.8 ppm).

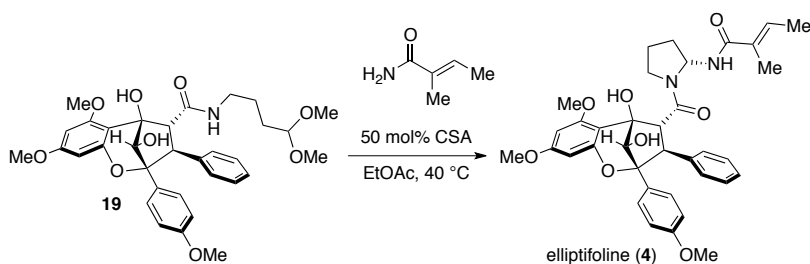

**Procedure to Prepare elliptifoline (4):** A dry flask was charged with aglain amide **19** (38 mg, 0.064 mmol, 1.0 equiv.) and a stir

bar under argon. (+)-**19** was dissolved in EtOAc (6.0 mL) and chilled to 0 °C. Under argon, CSA (7.5 mg, 0.032 mmol, 0.5 equiv.) and tigloyl amide (32 mg, 0.32 mmol, 5 equiv.) were added, and the reaction was warmed up to rt then heated at 40 °C for 6 h. Triethylamine (5  $\mu\text{L}$ , 0.032 mmol, 0.5 equiv.) was added and stirred for 30 min. Water (2 mL) was added to the reaction, and the organic layer was separated and dried over sodium sulfate. The organic layer was concentrated and purified using preparative TLC (49:1  $\text{CHCl}_3/\text{MeOH}$ ) using a TLC plate that was neutralized with a MeOH/triethylamine solution (99:1 MeOH/triethylamine). Elliptifoline **4** was isolated (32 mg, 0.051 mmol, 81%) as a white solid. The reaction of ( $\pm$ )-**19** to ( $\pm$ )-**4** was reacted and purified in the exact same fashion and was crystallized *via* slow evaporation in  $\text{CH}_2\text{Cl}_2$  (200  $\mu\text{L}$ ) and 2,2,4-trimethylpentane (100  $\mu\text{L}$ ). White solid;  $R_f = 0.24$  (1:4 hexanes/EtOAc);  $[\alpha]_D^{20} = +172^\circ$  ( $c = 0.2$ ,  $\text{CHCl}_3$ ); **m.p.** 185 °C; **IR**  $\nu_{\text{max}}$  (film): 3441, 3018, 1621, 1517, 1215, 1149, 751  $\text{cm}^{-1}$ ;  $^1\text{H}$  NMR (500 MHz,  $\text{CDCl}_3$ )  $\delta$  7.40 (d,  $J = 9.0$  Hz, 2H), 7.11 (br dd,  $J = 6.5, 2.5$  Hz, 1H), 6.91-6.88 (overlapping m, 3H), 6.67-6.58 (m, 1H), 6.63 (d,  $J = 9.0$  Hz, 2H), 6.14-6.01 (m, 1H), 6.10 (d,  $J = 2.0$  Hz, 1H), 6.05 (d,  $J = 2.0$  Hz, 1H), 5.38 (d,  $J = 8.0$  Hz, 1H), 4.78 (s, 1H), 4.46 (d,  $J = 9.0$  Hz, 1H), 4.14 (d,  $J = 9.0$  Hz, 1H), 3.81 (s, 3H), 3.72 (s, 3H), 3.68 (s, 3H), 3.66 (s, 1H), 3.60 (m, 1H), 3.21 (ddd,  $J = 12.0, 9.8, 7.0$  Hz, 1H), 2.07 (ddd,  $J = 12.5, 12.5, 6.5$  Hz, 1H), 2.00-1.89 (ovrlp m, 2H), 1.78-1.71 (m, 1H), 1.64 (dd,  $J = 7.0, 1.5$  Hz, 3H), 1.48 (br s, 3H);  $^{13}\text{C}$  NMR (100 MHz,  $\text{CDCl}_3$ )  $\delta$  169.8, 167.7, 161.2, 158.7, 157.9, 153.8, 141.9, 132.0, 130.8, 130.41 (2C), 130.37 (C1'), 130.2 (2C), 127.9 (2C), 125.7, 112.9 (2C), 105.2, 94.5, 92.2, 89.2, 81.9, 80.00, 63.6, 62.6, 57.2, 56.1, 55.4, 55.2, 46.1, 34.6, 21.6, 14.0, 12.2; **HR-MS**:  $m/z$  Calcd for  $[\text{C}_{36}\text{H}_{40}\text{N}_2\text{O}_8+\text{Na}]^+$  651.2682, found 651.2663 (-2.9

ppm).

**Table SI-3.** Comparison of  $^1\text{H}$  and  $^{13}\text{C}$  spectra for natural and synthetic elliptifoline (**4**)

| $^1\text{H}$ Literature <sup>S4</sup> |                     | $^1\text{H}$ Observed |                            | $^{13}\text{C}$ Literature <sup>S4</sup> | $^{13}\text{C}$ Observed |
|---------------------------------------|---------------------|-----------------------|----------------------------|------------------------------------------|--------------------------|
| Chemical Shift (ppm)                  | Appearance          | Chemical Shift (ppm)  | Appearance                 | Chemical Shift (ppm)                     | Chemical Shift (ppm)     |
| 7.41                                  | m, 2H               | 7.40                  | d, $J = 9.0$ Hz, 2H        | 169.9                                    | 169.8                    |
| 7.11                                  | m, 2H               | 7.11                  | m, 2H                      | 167.9                                    | 167.7                    |
| 6.91                                  | m, 1H               | 6.90                  | m, 1H                      | 161.0                                    | 161.2                    |
| 6.89                                  | m, 2H               | 6.89                  | m, 2H                      | 158.4                                    | 158.7                    |
| 6.63                                  | m, 1H               | 6.63                  | m, 1H                      | 158.1                                    | 157.9                    |
| 6.60                                  | m, 2H               | 6.63                  | d, $J = 9.0$ Hz, 2H        | 153.7                                    | 153.8                    |
| 6.09                                  | m, 1H               | 6.10                  | d, $J = 2.0$ Hz, 1H        | 141.8                                    | 141.9                    |
| 6.06                                  | m, 1H               | 6.05                  | d, $J = 2.0$ Hz, 1H        | 131.8                                    | 132.0                    |
| 6.02                                  | m, 1H               | 6.08                  | m, 1H                      | 130.7                                    | 130.4                    |
| 5.88                                  | s, 1H               | 5.75                  | s, 1H                      | 130.4                                    | 130.4                    |
| 5.57                                  | d, $J = 7.9$ Hz, 1H | 5.38                  | d, $J = 8.0$ Hz, 1H        | 130.2                                    | 130.2                    |
| 4.80                                  | s, 1H               | 4.78                  | s, 1H                      | 127.7                                    | 127.9                    |
| 4.62                                  | s, 1H               | 3.66                  | s, 1H                      | 125.6                                    | 125.7                    |
| 4.45                                  | d, $J = 9.2$ Hz     | 4.46                  | d, $J = 9.0$ Hz, 1H        | 112.6                                    | 112.9                    |
| 4.15                                  | d, $J = 9.2$ Hz     | 4.15                  | d, $J = 9.0$ Hz, 1H        | 105.4                                    | 105.2                    |
| 3.80                                  | m, 3H               | 3.81                  | s, 3H                      | 94.2                                     | 94.5                     |
| 3.71                                  | m, 3H               | 3.72                  | s, 3H                      | 91.9                                     | 92.2                     |
| 3.66                                  | s, 3H               | 3.68                  | s, 3H                      | 88.9                                     | 89.2                     |
| 3.58                                  | m, 1H               | 3.60                  | m, 1H                      | 81.9                                     | 81.9                     |
| 3.21                                  | m, 1H               | 3.22                  | m, 1H                      | 79.7                                     | 80.0                     |
| 2.02                                  | m, 2H               | 2.08                  | m, 1H                      | 63.7                                     | 63.6                     |
| 1.84                                  | m, 2H               | 1.94                  | m, 2H                      | 62.3                                     | 62.6                     |
|                                       |                     | 1.75                  | m, 1H                      | 57.1                                     | 57.2                     |
| 1.63                                  | d, $J = 7.0$ , 3H   | 1.64                  | dd, $J = 7.0$ , 1.5 Hz, 3H | 56.0                                     | 56.1                     |
| 1.47                                  | s, 3H               | 1.48                  | br s, 3H                   | 55.2                                     | 55.4                     |
|                                       |                     |                       |                            | 55.0                                     | 55.2                     |
|                                       |                     |                       |                            | 46.1                                     | 46.1                     |
|                                       |                     |                       |                            | 34.5                                     | 34.6                     |
|                                       |                     |                       |                            | 21.4                                     | 21.6                     |
|                                       |                     |                       |                            | 13.9                                     | 14.0                     |
|                                       |                     |                       |                            | 12.0                                     | 12.2                     |

<sup>S4</sup> Wang, S. K.; Cheng, Y.J.; Duh, C.-Y. *J. Nat. Prod.* **2001**, *64*, 92-94.

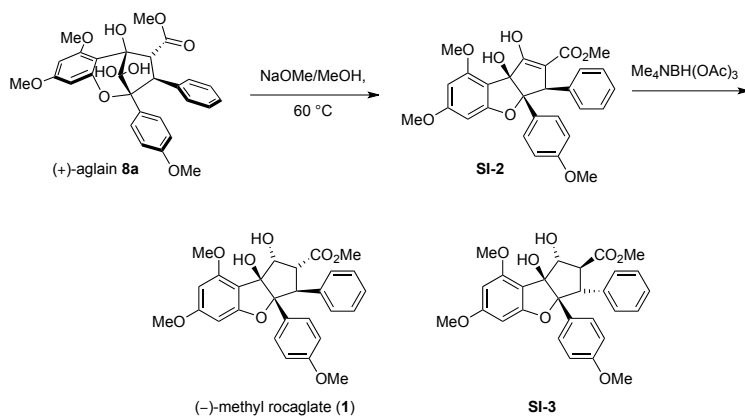

**Procedure to prepare (-)-methyl rocaglate 1 from enantioenriched (+)-8a:** Enantioenriched (+)-**8a** was prepared using the following procedure: a 16 x 100 mm Pyrex test tube was flame dried under vacuum and then charged with anhydrous 3-hydroxyflavone **5** (dried overnight in vacuum oven) (100 mg, 1.0 equiv, 0.305 mmol), methyl cinnamate **6a** (247 mg, 5.0 equiv, 1.52 mmol), and TADDOL **17** (276 mg, 0.305 mmol, 1.0 equiv) in anhydrous CH<sub>2</sub>Cl<sub>2</sub> (0.05M; 6.0mL). After degassing with argon for 10 min, the mixture was stirred and irradiated at -78 °C in

the Rayonet RPR-3100 (315 <math>\lambda</math> <math>< 400</math> nm) for 10 h. The solution was concentrated *in vacuo* to afford a brown-yellow oil. Silica gel was washed successively with 80:20:03 hexanes/EtOAc/NEt<sub>3</sub> (one column length) and 80:20 hexanes/EtOAc (one column length) to neutralize acidity. Purification *via* flash chromatography using a gradient of hexanes/EtOAc (80:20 to 30:70) afforded cyclopenta[bc]benzopyran **8a**, a light yellow foam, as a mixture of isomers (107 mg, 0.210 mmol, 69%). This mixture of isomers was used without further purification in a base mediated ketol rearrangement to form a cyclopenta[bc]benzofuran **SI-2** using the following procedure:<sup>S5</sup> To a solution of **8a** (107 mg, 0.210 mmol, 1 equiv) in MeOH (4 mL) under an inert atmosphere was added a solution of freshly prepared NaOMe in methanol (0.3 M, 1.8 mL, 0.540 mmol, 2.6 equiv) at rt. The resulting solution was stirred for 30 min at 60 °C. After removal of the MeOH under vacuum, the crude reaction mixture was quenched with a sat. NH<sub>4</sub>Cl solution (10 mL) and HCl (1M, 5 mL) giving a yellowish, cloudy solution which was extracted with EtOAc (3 x 10 mL). The combined organic layers were then washed with brine (10 mL), dried over sodium sulfate, filtered, and concentrated *in vacuo* to afford quantitatively a crude yellow oil **SI-2** (107 mg, 0.24 mmol) which was used without further purification in the next step:<sup>S5</sup> To a solution of trimethoxy-cyclopenta[bc]benzofurans **SI-2** (107 mg, 0.21 mmol, 1.0 equiv.) in CH<sub>3</sub>CN (6.0 mL) at 0 °C under inert atmosphere were added successively acetic acid (115 μL, 2.10 mmol, 10 equiv.) and Me<sub>4</sub>NBH(OAc)<sub>3</sub> (340 mg, 1.26 mmol, 6 equiv). The resulting yellow solution was stirred for 12 h at 0 °C to rt before being quenched with a sat. NH<sub>4</sub>Cl solution (4 mL). The mixture was then extracted with EtOAc (3 x 5 mL) and the combined organic layers were washed with sat. NaHCO<sub>3</sub> (20 mL), dried over Na<sub>2</sub>SO<sub>4</sub>, filtered, and concentrated *in vacuo*. Note: removal of the generated AcOH by a basic wash (NaHCO<sub>3</sub>) prior to concentration avoided degradation of the crude material. The crude material was purified by flash chromatography (gradient of EtOAc/hexane, 10:90 → 40:60) to afford methyl rocaglate (**1**) (61 mg, 0.124 mmol, 52% over two steps) and its diastereomer **SI-3** (19 mg, 0.039 mmol, (16% over two steps).

Chiral HPLC Analysis of racemic methyl rocaglate (**1**): Regis Pirkle covalent (R,R) WHELK-O 1 column was used, with an isocratic mobile phase of isopropanol/hexanes (20:80) with a flow rate of 1.0 mL/min for 40 min.

<sup>S5</sup> Roche, S. P.; Cencic, R.; Pelletier J.; Porco Jr., J. A. *Angew. Chem. Int. Ed.* **2010**, *49*, 6533-6538.  
S22

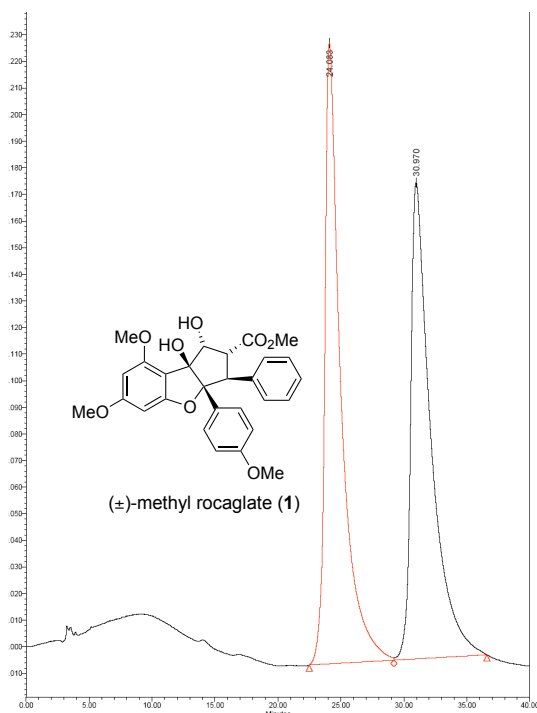

| Name | Retention Time (min) | Area ( $\mu\text{V}\cdot\text{sec}$ ) | % Area | Height ( $\mu\text{V}$ ) | Int Type | Amount | Units | Peak Type | Peak Codes |
|------|----------------------|---------------------------------------|--------|--------------------------|----------|--------|-------|-----------|------------|
| 1    | 24.083               | 20723418                              | 51.00  | 233307                   | BV       |        |       | Unknown   |            |
| 2    | 30.970               | 19907670                              | 49.00  | 178959                   | VB       |        |       | Unknown   |            |

Chiral HPLC Analysis of enantioenriched (–)-methyl rocaglate (**1**): *Regis Pirkle covalent (R,R) WHELK-O 1* column was used, with an isocratic mobile phase of isopropanol/hexanes (20:80) with a flow rate of 1.0 mL/min for 45 min.

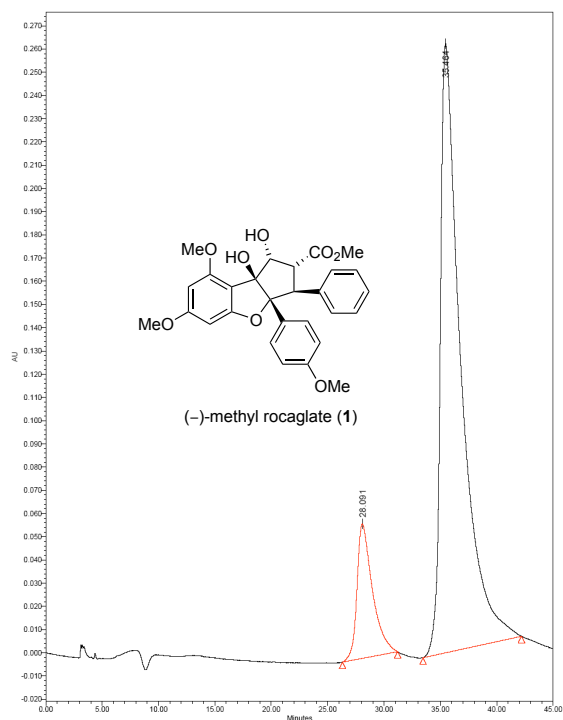

| Name | Retention Time (min) | Area ( $\mu\text{V}\cdot\text{sec}$ ) | % Area | Height ( $\mu\text{V}$ ) | Int Type | Amount | Units | Peak Type | Peak Codes |
|------|----------------------|---------------------------------------|--------|--------------------------|----------|--------|-------|-----------|------------|
| 1    | 28.091               | 5524911                               | 14.16  | 57885                    | BB       |        |       | Unknown   |            |
| 2    | 35.464               | 33481711                              | 85.84  | 262284                   | BB       |        |       | Unknown   |            |

After HPLC analysis of enantioenriched methyl rocaglate (**1**), the optical rotation was measured.  $[\alpha]_{\text{D}}^{20} = -32^\circ$  (71.5% ee), consistent with previous literature reports for (–)-methyl rocaglate.<sup>S2</sup> All other spectroscopic properties were identical to previous reports.

<sup>S2</sup> Gerard, B.; Jones II, G.; Porco Jr., J. A. *J. Am. Chem. Soc.* **2004**, *126*, 13620–13621.

## D. X-ray Crystallographic Data

### X-ray crystallographic data for enantiopure (+)-**9a**

#### (Absolute and relative stereochemistry)

Crystals of compound (+)-**9a** suitable for X-ray analysis were obtained by slow evaporation from isopropanol, then another recrystallization by slow evaporation from acetonitrile. Crystallographic data have been deposited with the Cambridge Crystallographic Data Centre (CCDC #833990). Copies of the data can be obtained free of charge on application to the CCDC, 12 Union Road, Cambridge CB21EZ, UK (fax: (+44)- 1223-336-033; e-mail: [deposit@ccdc.cam.ac.uk](mailto:deposit@ccdc.cam.ac.uk)).

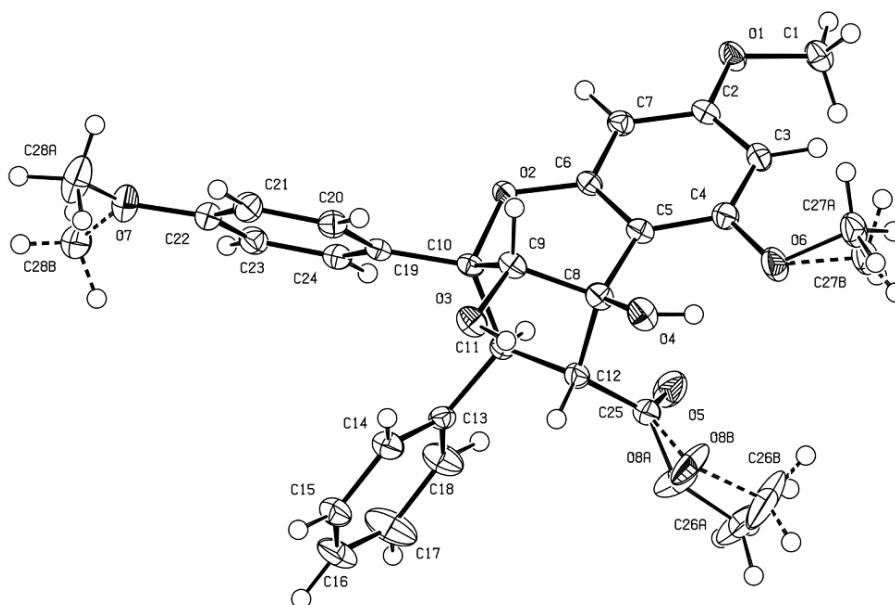

**Table SI-4.** Crystal data and structure refinement for the absolute stereochemistry of the reduced aglain (+)-**9a**.

Identification code **9a**

#### Crystal data

|                                  |                                                         |
|----------------------------------|---------------------------------------------------------|
| $C_{28}H_{28}O_8$                | $F(000) = 1040$                                         |
| $M_r = 492.50$                   | $D_x = 1.374 \text{ Mg m}^{-3}$                         |
| Orthorhombic, $P2_12_12_1$       | Cu $K\alpha$ radiation, $\lambda = 1.54178 \text{ \AA}$ |
| Hall symbol: P 2ac 2ab           | Cell parameters from 9257 reflections                   |
| $a = 6.3478 (2) \text{ \AA}$     | $\theta = 13.7\text{--}131.9^\circ$                     |
| $b = 12.4544 (4) \text{ \AA}$    | $\mu = 0.84 \text{ mm}^{-1}$                            |
| $c = 30.1079 (10) \text{ \AA}$   | $T = 100 \text{ K}$                                     |
| $V = 2380.27 (13) \text{ \AA}^3$ | Block, colorless                                        |



|         |                                   |
|---------|-----------------------------------|
| $Z = 4$ | $0.20 \times 0.08 \times 0.06$ mm |
|---------|-----------------------------------|

## Data collection

|                                                            |                                                                        |
|------------------------------------------------------------|------------------------------------------------------------------------|
| Bruker Proteum-R diffractometer                            | 4168 independent reflections                                           |
| Radiation source: rotating anode                           | 4141 reflections with $I > 2\sigma(I)$                                 |
| graphite                                                   | $R_{\text{int}} = 0.033$                                               |
| $\phi$ & $\omega$ scans                                    | $\theta_{\text{max}} = 66.2^\circ$ , $\theta_{\text{min}} = 3.8^\circ$ |
| Absorption correction: multi-scan SADABS (Sheldrick, 1996) | $h = -7 \rightarrow 7$                                                 |
| $T_{\text{min}} = 0.686$ , $T_{\text{max}} = 0.753$        | $k = -14 \rightarrow 14$                                               |
| 120163 measured reflections                                | $l = -35 \rightarrow 35$                                               |

## Refinement

|                                                                |                                                                                     |
|----------------------------------------------------------------|-------------------------------------------------------------------------------------|
| Refinement on $F^2$                                            | Secondary atom site location: difference Fourier map                                |
| Least-squares matrix: full                                     | Hydrogen site location: inferred from neighbouring sites                            |
| $R[F^2 > 2\sigma(F^2)] = 0.024$                                | H-atom parameters constrained                                                       |
| $wR(F^2) = 0.061$                                              | $w = 1/[\sigma^2(F_o^2) + (0.0333P)^2 + 0.5417P]$<br>where $P = (F_o^2 + 2F_c^2)/3$ |
| $S = 1.04$                                                     | $(\Delta/\sigma)_{\text{max}} = 0.002$                                              |
| 4168 reflections                                               | $\Delta)_{\text{max}} = 0.22 \text{ e } \text{\AA}^{-3}$                            |
| 367 parameters                                                 | $\Delta)_{\text{min}} = -0.17 \text{ e } \text{\AA}^{-3}$                           |
| 13 restraints                                                  | Absolute structure: Flack H D (1983), Acta Cryst. A39, 876-881                      |
| Primary atom site location: structure-invariant direct methods | Flack parameter: -0.03 (11)                                                         |

## Special details

**Geometry.** All esds (except the esd in the dihedral angle between two l.s. planes) are estimated using the full covariance matrix. The cell esds are taken into account individually in the estimation of esds in distances, angles and torsion angles; correlations between esds in cell parameters are only used when they are defined by crystal symmetry. An approximate (isotropic) treatment of cell esds is used for estimating esds involving l.s. planes.

**Refinement.** Refinement of  $F^2$  against ALL reflections. The weighted R-factor  $wR$  and goodness of fit  $S$  are based on  $F^2$ , conventional R-factors  $R$  are based on  $F$ , with  $F$  set to zero for negative  $F^2$ . The threshold expression of  $F^2 > 2\sigma(F^2)$  is used only for calculating R-factors(gt) etc. and is not relevant to the choice of reflections for refinement. R-factors based on  $F^2$  are

statistically about twice as large as those based on F, and R- factors based on ALL data will be even larger.

The crystallized compound was known to be a single enantiomer with >98% ee separated by chiral chromatography. The absolute structure was determined unambiguously from the crystal data alone, with all relevant indicators of correctness in agreement. Upon completion of refinement with XL, OLEX2 calculates and outputs values for these parameters. This output is given here:

Bijvoet pair analysis using Gaussian distribution Bijvoet pairs (all): 1742 Bijvoet pairs (used): 1737 Bijvoet pairs coverage: 0.99 G: 1.01 (3) P2(true): 1.000 P3(true): 1.000 P3(false): 0.000 P3(racemic twin): 0.000 Hooft y: -0.005 (15) Flack x: -0.03 (11)

CheckCIF alerts and response:

Alert level B PLAT220\_ALERT\_2\_B Large Non-Solvent C Ueq(max)/Ueq(min) ...4.52 Ratio PLAT230\_ALERT\_2\_B Hirshfeld Test Diff for O7 -C28A .. 8.28 su PLAT413\_ALERT\_2\_B Short Inter XH3 .. XHn H17 .. H28F .. 1.92 Ang. Alert level C PLAT213\_ALERT\_2\_C Atom C26B has ADP max/min Ratio ... 3.20 prola PLAT222\_ALERT\_3\_C Large Non-Solvent H Uiso(max)/Uiso(min) ...5.60 Ratio

The structure includes three disordered OMe groups, each refined with its own occupancy free variable, and the diffuse electron densities associated with these disorders give rise to the level B and level C alerts. Anisotropic refinement of the major and minor components C26A and C26B leads to somewhat prolate ellipsoids, and the riding H atoms have correspondingly large isotropic thermal parameters. The short inter-molecular H17 .. H28F contact is most likely due to imprecise positions for the three hydrogen atoms on C28B, which is part of a minor (23%) component of the C28 disorder. The relatively low electron density for the minor component atom C28B also likely gives rise to a slightly mis-oriented thermal ellipsoid for this atom, generating the Hirshfeld test alert.

Despite the slight anomalies for these disordered groups, the chemical characteristics of interest for this research, the regio- and stereochemistry, are unambiguous.

### Fractional atomic coordinates and isotropic or equivalent isotropic displacement parameters ( $\text{\AA}^2$ )

|     | x            | y            | z           | $U_{iso}^*/U_{eq}$ | Occ. (<1) |
|-----|--------------|--------------|-------------|--------------------|-----------|
| O2  | 0.63728 (13) | 0.45064 (6)  | 0.32457 (2) | 0.01780 (17)       |           |
| O3  | 0.13731 (13) | 0.52418 (7)  | 0.37597 (3) | 0.02269 (18)       |           |
| H3  | 0.0785       | 0.5843       | 0.3784      | 0.034*             |           |
| O1  | 1.13444 (13) | 0.63226 (7)  | 0.23874 (3) | 0.02269 (18)       |           |
| O6  | 0.60473 (17) | 0.83364 (7)  | 0.31928 (3) | 0.0327 (2)         |           |
| O4  | 0.28545 (14) | 0.72388 (7)  | 0.35232 (3) | 0.02514 (19)       |           |
| H4  | 0.3497       | 0.7816       | 0.3473      | 0.038*             |           |
| O7  | 0.28132 (17) | 0.00827 (7)  | 0.37268 (3) | 0.0366 (2)         |           |
| O8A | 0.6000 (12)  | 0.7690 (9)   | 0.4474 (3)  | 0.0379 (15)        | 0.60 (3)  |
| O5  | 0.86467 (16) | 0.69235 (8)  | 0.41110 (3) | 0.0346 (2)         |           |
| C16 | 0.4986 (2)   | 0.35964 (12) | 0.53217 (4) | 0.0340 (3)         |           |

|     |              |              |             |            |  |
|-----|--------------|--------------|-------------|------------|--|
| H16 | 0.4800       | 0.3289       | 0.5608      | 0.041*     |  |
| C17 | 0.6947 (3)   | 0.39232 (15) | 0.51847 (5) | 0.0464 (4) |  |
| H17 | 0.8119       | 0.3850       | 0.5378      | 0.056*     |  |
| C11 | 0.59038 (18) | 0.50155 (9)  | 0.40315 (4) | 0.0169 (2) |  |
| H11 | 0.7457       | 0.5023       | 0.3977      | 0.020*     |  |
| C18 | 0.7226 (2)   | 0.43616 (12) | 0.47635 (4) | 0.0324 (3) |  |
| H18 | 0.8594       | 0.4576       | 0.4671      | 0.039*     |  |
| C24 | 0.56519 (19) | 0.26001 (10) | 0.38010 (4) | 0.0201 (2) |  |
| H24 | 0.6999       | 0.2841       | 0.3896      | 0.024*     |  |
| C1  | 1.2536 (2)   | 0.72764 (10) | 0.23044 (4) | 0.0245 (3) |  |
| H1C | 1.2801       | 0.7649       | 0.2586      | 0.037*     |  |
| H1A | 1.1741       | 0.7749       | 0.2105      | 0.037*     |  |
| H1B | 1.3881       | 0.7085       | 0.2166      | 0.037*     |  |
| C7  | 0.87442 (19) | 0.54562 (9)  | 0.28002 (4) | 0.0182 (2) |  |
| H7  | 0.9316       | 0.4789       | 0.2706      | 0.022*     |  |
| C9  | 0.31375 (18) | 0.53313 (9)  | 0.34756 (4) | 0.0188 (2) |  |
| H9  | 0.2726       | 0.5249       | 0.3157      | 0.023*     |  |
| C10 | 0.48211 (18) | 0.45127 (9)  | 0.36091 (4) | 0.0166 (2) |  |
| C12 | 0.51390 (19) | 0.62024 (9)  | 0.40371 (4) | 0.0188 (2) |  |
| H12 | 0.3914       | 0.6256       | 0.4245      | 0.023*     |  |
| C13 | 0.55406 (19) | 0.44888 (9)  | 0.44792 (4) | 0.0179 (2) |  |
| C15 | 0.3287 (2)   | 0.37175 (11) | 0.50404 (4) | 0.0279 (3) |  |
| H15 | 0.1928       | 0.3491       | 0.5133      | 0.033*     |  |
| C22 | 0.3203 (2)   | 0.11561 (10) | 0.36849 (4) | 0.0239 (3) |  |
| C21 | 0.1751 (2)   | 0.18818 (10) | 0.35177 (4) | 0.0248 (3) |  |
| H21 | 0.0417       | 0.1637       | 0.3417      | 0.030*     |  |
| C6  | 0.70610 (18) | 0.54864 (9)  | 0.30923 (4) | 0.0168 (2) |  |
| C23 | 0.5177 (2)   | 0.15195 (10) | 0.38233 (4) | 0.0225 (3) |  |
| H23 | 0.6192       | 0.1025       | 0.3932      | 0.027*     |  |
| C3  | 0.8684 (2)   | 0.73938 (10) | 0.27651 (4) | 0.0211 (2) |  |
| H3A | 0.9226       | 0.8048       | 0.2650      | 0.025*     |  |
| C5  | 0.61287 (19) | 0.64468 (9)  | 0.32260 (4) | 0.0185 (2) |  |
| C2  | 0.95809 (19) | 0.64148 (10) | 0.26473 (4) | 0.0188 (2) |  |
| C19 | 0.41916 (19) | 0.33482 (9)  | 0.36415 (3) | 0.0176 (2) |  |
| C8  | 0.43202 (18) | 0.63886 (9)  | 0.35552 (4) | 0.0194 (2) |  |
| C25 | 0.6803 (2)   | 0.69747 (10) | 0.41900 (4) | 0.0224 (3) |  |
| C20 | 0.2249 (2)   | 0.29713 (10) | 0.34979 (4) | 0.0218 (3) |  |
| H20 | 0.1242       | 0.3464       | 0.3384      | 0.026*     |  |
| C4  | 0.6981 (2)   | 0.73928 (10) | 0.30537 (4) | 0.0215 (2) |  |

|      |             |               |             |             |           |
|------|-------------|---------------|-------------|-------------|-----------|
| C14  | 0.3552 (2)  | 0.41686 (10)  | 0.46227 (4) | 0.0244 (3)  |           |
| H14  | 0.2369      | 0.4260        | 0.4433      | 0.029*      |           |
| C28A | 0.0882 (3)  | -0.03279 (14) | 0.35960 (8) | 0.0402 (6)  | 0.772 (4) |
| H28B | 0.0824      | -0.1097       | 0.3665      | 0.060*      | 0.772 (4) |
| H28A | 0.0702      | -0.0223       | 0.3276      | 0.060*      | 0.772 (4) |
| H28C | -0.0248     | 0.0046        | 0.3755      | 0.060*      | 0.772 (4) |
| C27A | 0.6151 (3)  | 0.92590 (12)  | 0.28969 (6) | 0.0284 (5)  | 0.809 (4) |
| H27C | 0.7575      | 0.9562        | 0.2904      | 0.043*      | 0.809 (4) |
| H27B | 0.5137      | 0.9803        | 0.2994      | 0.043*      | 0.809 (4) |
| H27A | 0.5810      | 0.9033        | 0.2594      | 0.043*      | 0.809 (4) |
| C27B | 0.7203 (15) | 0.9325 (6)    | 0.3066 (3)  | 0.0284 (5)  | 0.191 (4) |
| H27E | 0.8609      | 0.9315        | 0.3201      | 0.043*      | 0.191 (4) |
| H27F | 0.6429      | 0.9956        | 0.3172      | 0.043*      | 0.191 (4) |
| H27D | 0.7336      | 0.9359        | 0.2742      | 0.043*      | 0.191 (4) |
| C26A | 0.7445 (11) | 0.8444 (10)   | 0.4661 (4)  | 0.059 (2)   | 0.60 (3)  |
| H26B | 0.8594      | 0.8057        | 0.4809      | 0.088*      | 0.60 (3)  |
| H26C | 0.6710      | 0.8894        | 0.4879      | 0.088*      | 0.60 (3)  |
| H26A | 0.8024      | 0.8897        | 0.4425      | 0.088*      | 0.60 (3)  |
| C28B | 0.3506 (12) | -0.0556 (5)   | 0.4031 (2)  | 0.0358 (18) | 0.228 (4) |
| H28E | 0.2468      | -0.1123       | 0.4085      | 0.054*      | 0.228 (4) |
| H28F | 0.3740      | -0.0150       | 0.4306      | 0.054*      | 0.228 (4) |
| H28D | 0.4835      | -0.0878       | 0.3933      | 0.054*      | 0.228 (4) |
| O8B  | 0.588 (2)   | 0.7847 (10)   | 0.4360 (6)  | 0.043 (2)   | 0.40 (3)  |
| C26B | 0.741 (2)   | 0.8716 (9)    | 0.4494 (8)  | 0.074 (3)   | 0.40 (3)  |
| H26E | 0.8468      | 0.8416        | 0.4697      | 0.112*      | 0.40 (3)  |
| H26F | 0.6649      | 0.9296        | 0.4644      | 0.112*      | 0.40 (3)  |
| H26D | 0.8116      | 0.8999        | 0.4229      | 0.112*      | 0.40 (3)  |

### Atomic displacement parameters (Å<sup>2</sup>)

|     | $U^{11}$    | $U^{22}$   | $U^{33}$   | $U^{12}$     | $U^{13}$     | $U^{23}$   |
|-----|-------------|------------|------------|--------------|--------------|------------|
| O2  | 0.0202 (4)  | 0.0168 (4) | 0.0164 (4) | 0.0000 (3)   | 0.0037 (3)   | 0.0016 (3) |
| O3  | 0.0162 (4)  | 0.0276 (4) | 0.0244 (4) | 0.0026 (3)   | 0.0039 (3)   | 0.0038 (3) |
| O1  | 0.0223 (4)  | 0.0221 (4) | 0.0237 (4) | 0.0013 (4)   | 0.0093 (4)   | 0.0037 (3) |
| O6  | 0.0459 (6)  | 0.0176 (4) | 0.0344 (5) | 0.0052 (4)   | 0.0212 (5)   | 0.0044 (4) |
| O4  | 0.0232 (4)  | 0.0229 (4) | 0.0294 (4) | 0.0084 (4)   | 0.0053 (4)   | 0.0056 (4) |
| O7  | 0.0516 (6)  | 0.0207 (4) | 0.0376 (5) | -0.0083 (4)  | -0.0002 (5)  | 0.0013 (4) |
| O8A | 0.0295 (17) | 0.044 (3)  | 0.040 (3)  | -0.0019 (17) | -0.0018 (16) | -0.025 (2) |

|      |             |             |             |             |             |             |
|------|-------------|-------------|-------------|-------------|-------------|-------------|
| O5   | 0.0276 (5)  | 0.0330 (5)  | 0.0434 (6)  | -0.0090 (4) | 0.0080 (4)  | -0.0113 (4) |
| C16  | 0.0411 (8)  | 0.0420 (8)  | 0.0189 (6)  | 0.0115 (7)  | 0.0057 (6)  | 0.0104 (6)  |
| C17  | 0.0318 (8)  | 0.0819 (12) | 0.0256 (7)  | 0.0110 (8)  | -0.0040 (6) | 0.0175 (8)  |
| C11  | 0.0165 (5)  | 0.0174 (5)  | 0.0169 (5)  | 0.0006 (5)  | 0.0005 (4)  | -0.0001 (4) |
| C18  | 0.0225 (6)  | 0.0514 (9)  | 0.0233 (6)  | 0.0014 (6)  | 0.0001 (5)  | 0.0066 (6)  |
| C24  | 0.0199 (6)  | 0.0241 (6)  | 0.0165 (5)  | -0.0005 (5) | 0.0007 (4)  | -0.0006 (5) |
| C1   | 0.0226 (6)  | 0.0263 (6)  | 0.0247 (6)  | -0.0020 (5) | 0.0051 (5)  | 0.0042 (5)  |
| C7   | 0.0195 (6)  | 0.0188 (5)  | 0.0163 (5)  | 0.0022 (5)  | -0.0001 (5) | 0.0009 (4)  |
| C9   | 0.0156 (5)  | 0.0234 (6)  | 0.0173 (5)  | 0.0010 (5)  | 0.0004 (4)  | 0.0027 (5)  |
| C10  | 0.0149 (5)  | 0.0211 (6)  | 0.0137 (5)  | -0.0002 (5) | 0.0024 (4)  | 0.0006 (4)  |
| C12  | 0.0210 (6)  | 0.0171 (6)  | 0.0182 (5)  | 0.0005 (5)  | 0.0044 (5)  | 0.0004 (4)  |
| C13  | 0.0214 (6)  | 0.0172 (5)  | 0.0152 (5)  | 0.0033 (5)  | 0.0007 (5)  | -0.0018 (4) |
| C15  | 0.0303 (7)  | 0.0308 (6)  | 0.0225 (6)  | -0.0012 (6) | 0.0079 (5)  | 0.0017 (5)  |
| C22  | 0.0306 (7)  | 0.0199 (6)  | 0.0211 (6)  | -0.0031 (5) | 0.0029 (5)  | -0.0009 (5) |
| C21  | 0.0244 (6)  | 0.0268 (6)  | 0.0233 (6)  | -0.0056 (5) | -0.0028 (5) | -0.0003 (5) |
| C6   | 0.0179 (5)  | 0.0188 (5)  | 0.0136 (5)  | 0.0009 (5)  | -0.0015 (4) | 0.0030 (4)  |
| C23  | 0.0259 (6)  | 0.0218 (6)  | 0.0198 (6)  | 0.0032 (5)  | 0.0016 (5)  | 0.0019 (5)  |
| C3   | 0.0249 (6)  | 0.0184 (5)  | 0.0199 (5)  | -0.0011 (5) | 0.0030 (5)  | 0.0035 (4)  |
| C5   | 0.0185 (5)  | 0.0213 (6)  | 0.0156 (5)  | 0.0020 (5)  | 0.0008 (5)  | 0.0019 (4)  |
| C2   | 0.0184 (6)  | 0.0238 (6)  | 0.0142 (5)  | 0.0006 (5)  | 0.0015 (4)  | 0.0025 (5)  |
| C19  | 0.0204 (6)  | 0.0201 (6)  | 0.0123 (5)  | -0.0009 (5) | 0.0025 (4)  | 0.0002 (4)  |
| C8   | 0.0185 (6)  | 0.0198 (6)  | 0.0199 (6)  | 0.0047 (5)  | 0.0028 (5)  | 0.0020 (5)  |
| C25  | 0.0292 (7)  | 0.0203 (6)  | 0.0177 (5)  | 0.0002 (5)  | 0.0012 (5)  | 0.0005 (5)  |
| C20  | 0.0230 (6)  | 0.0236 (6)  | 0.0188 (6)  | -0.0008 (5) | -0.0035 (5) | 0.0009 (5)  |
| C4   | 0.0267 (6)  | 0.0179 (6)  | 0.0198 (5)  | 0.0028 (5)  | 0.0027 (5)  | 0.0010 (5)  |
| C14  | 0.0235 (6)  | 0.0303 (6)  | 0.0196 (6)  | -0.0012 (5) | 0.0002 (5)  | 0.0012 (5)  |
| C28A | 0.0288 (10) | 0.0215 (9)  | 0.0704 (14) | -0.0027 (7) | 0.0067 (10) | -0.0081 (9) |
| C27A | 0.0347 (11) | 0.0179 (7)  | 0.0325 (10) | 0.0052 (7)  | 0.0084 (8)  | 0.0067 (7)  |
| C27B | 0.0347 (11) | 0.0179 (7)  | 0.0325 (10) | 0.0052 (7)  | 0.0084 (8)  | 0.0067 (7)  |
| C26A | 0.052 (3)   | 0.055 (4)   | 0.069 (4)   | -0.018 (2)  | 0.008 (3)   | -0.044 (3)  |
| C28B | 0.054 (4)   | 0.023 (3)   | 0.030 (3)   | -0.001 (3)  | 0.002 (3)   | 0.000 (2)   |
| O8B  | 0.053 (3)   | 0.019 (2)   | 0.056 (6)   | 0.0084 (18) | -0.012 (3)  | -0.020 (3)  |
| C26B | 0.099 (6)   | 0.024 (3)   | 0.101 (9)   | -0.011 (3)  | -0.037 (6)  | -0.021 (4)  |

### Geometric parameters (Å, °)

|        |             |         |             |
|--------|-------------|---------|-------------|
| O2—C6  | 1.3762 (13) | C12—C25 | 1.5012 (17) |
| O2—C10 | 1.4722 (13) | C12—C8  | 1.5583 (16) |
| O3—C9  | 1.4138 (14) | C12—H12 | 1.0000      |

|          |             |           |             |
|----------|-------------|-----------|-------------|
| O3—H3    | 0.8400      | C13—C14   | 1.3924 (18) |
| O1—C2    | 1.3706 (14) | C15—C14   | 1.3877 (18) |
| O1—C1    | 1.4303 (15) | C15—H15   | 0.9500      |
| O6—C4    | 1.3811 (15) | C22—C21   | 1.3856 (18) |
| O6—C27A  | 1.4553 (18) | C22—C23   | 1.3961 (19) |
| O6—C27B  | 1.484 (7)   | C21—C20   | 1.3944 (17) |
| O4—C8    | 1.4128 (14) | C21—H21   | 0.9500      |
| O4—H4    | 0.8400      | C6—C5     | 1.3939 (16) |
| O7—C28B  | 1.290 (6)   | C23—H23   | 0.9500      |
| O7—C22   | 1.3654 (15) | C3—C4     | 1.3871 (17) |
| O7—C28A  | 1.386 (2)   | C3—C2     | 1.3917 (17) |
| O8A—C25  | 1.336 (8)   | C3—H3A    | 0.9500      |
| O8A—C26A | 1.429 (11)  | C5—C4     | 1.3963 (17) |
| O5—C25   | 1.1958 (17) | C5—C8     | 1.5186 (16) |
| C16—C17  | 1.373 (2)   | C19—C20   | 1.3887 (17) |
| C16—C15  | 1.379 (2)   | C25—O8B   | 1.335 (12)  |
| C16—H16  | 0.9500      | C20—H20   | 0.9500      |
| C17—C18  | 1.392 (2)   | C14—H14   | 0.9500      |
| C17—H17  | 0.9500      | C28A—H28B | 0.9800      |
| C11—C13  | 1.5165 (15) | C28A—H28A | 0.9800      |
| C11—C12  | 1.5560 (15) | C28A—H28C | 0.9800      |
| C11—C10  | 1.5755 (15) | C27A—H27C | 0.9800      |
| C11—H11  | 1.0000      | C27A—H27B | 0.9800      |
| C18—C13  | 1.3794 (18) | C27A—H27A | 0.9800      |
| C18—H18  | 0.9500      | C27B—H27E | 0.9800      |
| C24—C23  | 1.3808 (17) | C27B—H27F | 0.9800      |
| C24—C19  | 1.3994 (17) | C27B—H27D | 0.9800      |
| C24—H24  | 0.9500      | C26A—H26B | 0.9800      |
| C1—H1C   | 0.9800      | C26A—H26C | 0.9800      |
| C1—H1A   | 0.9800      | C26A—H26A | 0.9800      |
| C1—H1B   | 0.9800      | C28B—H28E | 0.9800      |
| C7—C6    | 1.3843 (17) | C28B—H28F | 0.9800      |
| C7—C2    | 1.3854 (17) | C28B—H28D | 0.9800      |
| C7—H7    | 0.9500      | O8B—C26B  | 1.510 (18)  |
| C9—C10   | 1.5307 (16) | C26B—H26E | 0.9800      |
| C9—C8    | 1.5346 (16) | C26B—H26F | 0.9800      |
| C9—H9    | 1.0000      | C26B—H26D | 0.9800      |
| C10—C19  | 1.5075 (16) |           |             |
|          |             |           |             |

|              |             |             |             |
|--------------|-------------|-------------|-------------|
| C6—O2—C10    | 117.19 (8)  | C22—C21—H21 | 120.0       |
| C9—O3—H3     | 109.5       | C20—C21—H21 | 120.0       |
| C2—O1—C1     | 117.51 (9)  | O2—C6—C7    | 115.73 (10) |
| C4—O6—C27A   | 117.83 (10) | O2—C6—C5    | 121.96 (10) |
| C4—O6—C27B   | 114.6 (3)   | C7—C6—C5    | 122.31 (11) |
| C27A—O6—C27B | 33.4 (4)    | C24—C23—C22 | 119.83 (12) |
| C8—O4—H4     | 109.5       | C24—C23—H23 | 120.1       |
| C28B—O7—C22  | 127.4 (3)   | C22—C23—H23 | 120.1       |
| C28B—O7—C28A | 106.0 (3)   | C4—C3—C2    | 118.54 (11) |
| C22—O7—C28A  | 119.70 (13) | C4—C3—H3A   | 120.7       |
| C25—O8A—C26A | 116.4 (6)   | C2—C3—H3A   | 120.7       |
| C17—C16—C15  | 119.47 (12) | C6—C5—C4    | 116.90 (10) |
| C17—C16—H16  | 120.3       | C6—C5—C8    | 117.94 (10) |
| C15—C16—H16  | 120.3       | C4—C5—C8    | 125.14 (10) |
| C16—C17—C18  | 120.35 (13) | O1—C2—C7    | 115.51 (10) |
| C16—C17—H17  | 119.8       | O1—C2—C3    | 123.58 (11) |
| C18—C17—H17  | 119.8       | C7—C2—C3    | 120.89 (10) |
| C13—C11—C12  | 110.73 (9)  | C20—C19—C24 | 118.04 (11) |
| C13—C11—C10  | 118.63 (9)  | C20—C19—C10 | 122.72 (10) |
| C12—C11—C10  | 104.48 (9)  | C24—C19—C10 | 119.16 (10) |
| C13—C11—H11  | 107.5       | O4—C8—C5    | 114.67 (9)  |
| C12—C11—H11  | 107.5       | O4—C8—C9    | 108.07 (9)  |
| C10—C11—H11  | 107.5       | C5—C8—C9    | 107.98 (9)  |
| C13—C18—C17  | 120.77 (13) | O4—C8—C12   | 113.25 (9)  |
| C13—C18—H18  | 119.6       | C5—C8—C12   | 111.27 (9)  |
| C17—C18—H18  | 119.6       | C9—C8—C12   | 100.43 (9)  |
| C23—C24—C19  | 121.40 (11) | O5—C25—O8B  | 123.3 (6)   |
| C23—C24—H24  | 119.3       | O5—C25—O8A  | 122.5 (3)   |
| C19—C24—H24  | 119.3       | O8B—C25—O8A | 17.3 (7)    |
| O1—C1—H1C    | 109.5       | O5—C25—C12  | 126.40 (11) |
| O1—C1—H1A    | 109.5       | O8B—C25—C12 | 109.3 (6)   |
| H1C—C1—H1A   | 109.5       | O8A—C25—C12 | 110.8 (3)   |
| O1—C1—H1B    | 109.5       | C19—C20—C21 | 121.12 (12) |
| H1C—C1—H1B   | 109.5       | C19—C20—H20 | 119.4       |
| H1A—C1—H1B   | 109.5       | C21—C20—H20 | 119.4       |
| C6—C7—C2     | 118.92 (11) | O6—C4—C3    | 121.57 (10) |
| C6—C7—H7     | 120.5       | O6—C4—C5    | 116.05 (10) |
| C2—C7—H7     | 120.5       | C3—C4—C5    | 122.37 (11) |
| O3—C9—C10    | 109.98 (9)  | C15—C14—C13 | 120.48 (12) |

|             |             |                |            |
|-------------|-------------|----------------|------------|
| O3—C9—C8    | 111.14 (9)  | C15—C14—H14    | 119.8      |
| C10—C9—C8   | 100.89 (9)  | C13—C14—H14    | 119.8      |
| O3—C9—H9    | 111.5       | O7—C28A—H28B   | 109.5      |
| C10—C9—H9   | 111.5       | O7—C28A—H28A   | 109.5      |
| C8—C9—H9    | 111.5       | O7—C28A—H28C   | 109.5      |
| O2—C10—C19  | 102.72 (8)  | O6—C27A—H27C   | 109.5      |
| O2—C10—C9   | 105.99 (8)  | O6—C27A—H27B   | 109.5      |
| C19—C10—C9  | 118.21 (9)  | O6—C27A—H27A   | 109.5      |
| O2—C10—C11  | 108.08 (9)  | O6—C27B—H27E   | 109.5      |
| C19—C10—C11 | 116.47 (9)  | O6—C27B—H27F   | 109.5      |
| C9—C10—C11  | 104.59 (9)  | H27E—C27B—H27F | 109.5      |
| C25—C12—C11 | 113.10 (10) | O6—C27B—H27D   | 109.5      |
| C25—C12—C8  | 115.15 (10) | H27E—C27B—H27D | 109.5      |
| C11—C12—C8  | 103.62 (9)  | H27F—C27B—H27D | 109.5      |
| C25—C12—H12 | 108.2       | O7—C28B—H28E   | 109.5      |
| C11—C12—H12 | 108.2       | O7—C28B—H28F   | 109.5      |
| C8—C12—H12  | 108.2       | H28E—C28B—H28F | 109.5      |
| C18—C13—C14 | 118.53 (11) | O7—C28B—H28D   | 109.5      |
| C18—C13—C11 | 118.90 (11) | H28E—C28B—H28D | 109.5      |
| C14—C13—C11 | 122.52 (10) | H28F—C28B—H28D | 109.5      |
| C16—C15—C14 | 120.38 (12) | C25—O8B—C26B   | 113.8 (11) |
| C16—C15—H15 | 119.8       | O8B—C26B—H26E  | 109.5      |
| C14—C15—H15 | 119.8       | O8B—C26B—H26F  | 109.5      |
| O7—C22—C21  | 123.49 (12) | H26E—C26B—H26F | 109.5      |
| O7—C22—C23  | 116.90 (12) | O8B—C26B—H26D  | 109.5      |
| C21—C22—C23 | 119.61 (11) | H26E—C26B—H26D | 109.5      |
| C22—C21—C20 | 119.97 (12) | H26F—C26B—H26D | 109.5      |



## X-ray crystallographic data for ponapensin ( $\pm$ )-**3**

### (Absolute and relative stereochemistry)

Crystals of compound **3** suitable for X-ray analysis were obtained by slow evaporation from benzene/hexanes. Crystallographic data have been deposited with the Cambridge Crystallographic Data Centre (CCDC #833744). Copies of the data can be obtained free of charge on application to the CCDC, 12 Union Road, Cambridge CB21EZ, UK (fax: (+44)- 1223-336-033; e-mail: [deposit@ccdc.cam.ac.uk](mailto:deposit@ccdc.cam.ac.uk)).

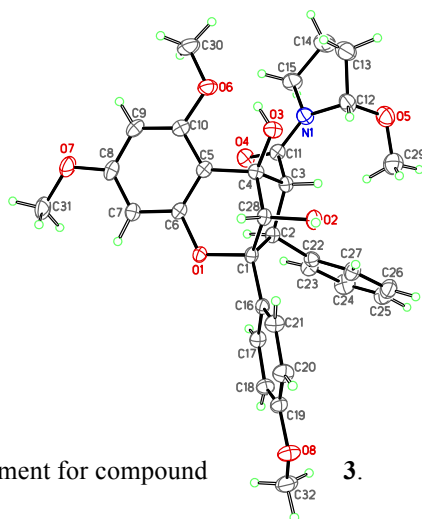

**Table SI-5.** Crystal data and structure refinement for compound

|                        |                                                  |                        |
|------------------------|--------------------------------------------------|------------------------|
| Identification code    | <b>3</b>                                         |                        |
| Empirical formula      | C <sub>44</sub> H <sub>47</sub> N O <sub>8</sub> |                        |
| Formula weight         | 717.83                                           |                        |
| Temperature            | 173(2) K                                         |                        |
| Wavelength             | 0.71073 Å                                        |                        |
| Crystal system         | Triclinic                                        |                        |
| Space group            | P-1                                              |                        |
| Unit cell dimensions   | a = 11.6354(9) Å                                 | $\alpha$ = 71.620(4)°. |
|                        | b = 12.6447(10) Å                                | $\beta$ = 69.603(4)°.  |
|                        | c = 15.6781(11) Å                                | $\gamma$ = 63.746(4)°. |
| Volume                 | 1903.0(2) Å <sup>3</sup>                         |                        |
| Z                      | 2                                                |                        |
| Density (calculated)   | 1.253 Mg/m <sup>3</sup>                          |                        |
| Absorption coefficient | 0.086 mm <sup>-1</sup>                           |                        |
| F(000)                 | 764                                              |                        |

|                                   |                                             |
|-----------------------------------|---------------------------------------------|
| Crystal size                      | 0.30 x 0.15 x 0.05 mm <sup>3</sup>          |
| Theta range for data collection   | 1.83 to 26.37°.                             |
| Index ranges                      | -14<=h<=14, -15<=k<=15, -19<=l<=19          |
| Reflections collected             | 31176                                       |
| Independent reflections           | 7763 [R(int) = 0.0324]                      |
| Completeness to theta = 26.37°    | 99.7 %                                      |
| Absorption correction             | Semi-empirical from equivalents             |
| Max. and min. transmission        | 0.9957 and 0.9748                           |
| Refinement method                 | Full-matrix least-squares on F <sup>2</sup> |
| Data / restraints / parameters    | 7763 / 66 / 574                             |
| Goodness-of-fit on F <sup>2</sup> | 1.017                                       |
| Final R indices [I>2sigma(I)]     | R1 = 0.0435, wR2 = 0.1015                   |
| R indices (all data)              | R1 = 0.0640, wR2 = 0.1135                   |
| Largest diff. peak and hole       | 0.269 and -0.231 e.Å <sup>-3</sup>          |

Atomic coordinates ( x 10<sup>4</sup>) and equivalent isotropic displacement parameters (Å<sup>2</sup>x 10<sup>3</sup>)  
for compound **2**. U(eq) is defined as one third of the trace of the orthogonalized U<sup>ij</sup> tensor.

|      | x        | y        | z        | U(eq) |
|------|----------|----------|----------|-------|
| O(1) | 11264(1) | -2264(1) | -5237(1) | 24(1) |
| O(2) | 14602(1) | -3584(1) | -4862(1) | 27(1) |
| O(3) | 13601(1) | -5304(1) | -3710(1) | 28(1) |
| O(4) | 10306(1) | -3029(1) | -2324(1) | 33(1) |
| O(5) | 13686(1) | -4033(1) | -1225(1) | 47(1) |
| O(6) | 11431(1) | -5739(1) | -2853(1) | 35(1) |
| O(7) | 7915(1)  | -3872(1) | -4343(1) | 42(1) |
| O(8) | 13807(1) | 1285(1)  | -7953(1) | 39(1) |
| N(1) | 12054(1) | -4177(1) | -1714(1) | 32(1) |
| C(1) | 12367(1) | -2237(1) | -5001(1) | 22(1) |
| C(2) | 11866(2) | -1989(1) | -3979(1) | 23(1) |
| C(3) | 12428(2) | -3239(1) | -3372(1) | 23(1) |
| C(4) | 12712(1) | -4117(1) | -3988(1) | 23(1) |
| C(5) | 11445(1) | -4083(1) | -4079(1) | 24(1) |
| C(6) | 10801(1) | -3162(1) | -4711(1) | 23(1) |
| C(7) | 9630(2)  | -3052(1) | -4847(1) | 28(1) |
| C(8) | 9074(2)  | -3885(2) | -4302(1) | 31(1) |

|        |          |          |          |       |
|--------|----------|----------|----------|-------|
| C(9)   | 9658(2)  | -4801(2) | -3633(1) | 32(1) |
| C(10)  | 10813(2) | -4880(1) | -3522(1) | 28(1) |
| C(11)  | 11508(2) | -3450(1) | -2429(1) | 25(1) |
| C(12)  | 13428(2) | -4711(2) | -1662(1) | 37(1) |
| C(13)  | 13502(2) | -5893(2) | -1005(2) | 51(1) |
| C(14)  | 12173(2) | -5567(2) | -290(2)  | 55(1) |
| C(15)  | 11210(2) | -4595(2) | -843(1)  | 40(1) |
| C(16)  | 12766(1) | -1297(1) | -5771(1) | 23(1) |
| C(17)  | 11959(2) | -91(1)   | -5806(1) | 27(1) |
| C(18)  | 12255(2) | 796(2)   | -6525(1) | 30(1) |
| C(19)  | 13400(2) | 480(1)   | -7225(1) | 29(1) |
| C(20)  | 14204(2) | -719(2)  | -7214(1) | 34(1) |
| C(21)  | 13888(2) | -1597(2) | -6500(1) | 30(1) |
| C(22)  | 12201(2) | -1079(1) | -3779(1) | 26(1) |
| C(23)  | 11219(2) | -230(2)  | -3266(1) | 34(1) |
| C(24)  | 11517(2) | 544(2)   | -2997(1) | 45(1) |
| C(25)  | 12800(2) | 484(2)   | -3243(1) | 44(1) |
| C(26)  | 13786(2) | -344(2)  | -3765(1) | 40(1) |
| C(27)  | 13489(2) | -1117(2) | -4034(1) | 34(1) |
| C(28)  | 13392(1) | -3529(1) | -4922(1) | 22(1) |
| C(29)  | 13723(2) | -2908(2) | -1775(2) | 53(1) |
| C(30)  | 10734(2) | -6445(2) | -2167(1) | 48(1) |
| C(31)  | 7257(2)  | -2933(2) | -4998(2) | 46(1) |
| C(32)  | 13028(2) | 2528(2)  | -7962(1) | 45(1) |
| C(1S)  | 8790(3)  | -747(2)  | 507(2)   | 76(1) |
| C(2S)  | 7459(3)  | -259(2)  | 799(2)   | 70(1) |
| C(3S)  | 6688(2)  | -300(2)  | 358(2)   | 73(1) |
| C(4S)  | 7225(3)  | -839(3)  | -388(2)  | 75(1) |
| C(5S)  | 8555(3)  | -1336(2) | -699(2)  | 75(1) |
| C(6S)  | 9352(2)  | -1291(2) | -252(2)  | 78(1) |
| C(7S)  | 12139(3) | 7989(2)  | 1452(2)  | 81(1) |
| C(8S)  | 12603(3) | 7193(3)  | 882(2)   | 84(1) |
| C(9S)  | 13095(2) | 6004(3)  | 1217(2)  | 75(1) |
| C(10S) | 13113(2) | 5601(2)  | 2125(2)  | 63(1) |
| C(11S) | 12644(2) | 6389(2)  | 2695(2)  | 57(1) |
| C(12S) | 12171(2) | 7585(2)  | 2361(2)  | 66(1) |

---

Bond lengths [Å] and angles [°] for compound **3**.

---

|             |            |
|-------------|------------|
| O(1)-C(6)   | 1.3789(17) |
| O(1)-C(1)   | 1.4690(17) |
| O(2)-C(28)  | 1.4128(18) |
| O(3)-C(4)   | 1.4287(17) |
| O(4)-C(11)  | 1.2264(18) |
| O(5)-C(29)  | 1.423(2)   |
| O(5)-C(12)  | 1.426(2)   |
| O(6)-C(10)  | 1.3825(19) |
| O(6)-C(30)  | 1.428(2)   |
| O(7)-C(8)   | 1.3649(19) |
| O(7)-C(31)  | 1.424(2)   |
| O(8)-C(19)  | 1.3714(19) |
| O(8)-C(32)  | 1.423(2)   |
| N(1)-C(11)  | 1.354(2)   |
| N(1)-C(12)  | 1.457(2)   |
| N(1)-C(15)  | 1.476(2)   |
| C(1)-C(16)  | 1.509(2)   |
| C(1)-C(28)  | 1.535(2)   |
| C(1)-C(2)   | 1.5852(19) |
| C(2)-C(22)  | 1.511(2)   |
| C(2)-C(3)   | 1.550(2)   |
| C(3)-C(11)  | 1.518(2)   |
| C(3)-C(4)   | 1.550(2)   |
| C(4)-C(5)   | 1.511(2)   |
| C(4)-C(28)  | 1.533(2)   |
| C(5)-C(6)   | 1.385(2)   |
| C(5)-C(10)  | 1.404(2)   |
| C(6)-C(7)   | 1.392(2)   |
| C(7)-C(8)   | 1.382(2)   |
| C(8)-C(9)   | 1.392(2)   |
| C(9)-C(10)  | 1.372(2)   |
| C(12)-C(13) | 1.510(3)   |
| C(13)-C(14) | 1.529(3)   |
| C(14)-C(15) | 1.518(3)   |
| C(16)-C(17) | 1.388(2)   |

|                  |            |
|------------------|------------|
| C(16)-C(21)      | 1.396(2)   |
| C(17)-C(18)      | 1.386(2)   |
| C(18)-C(19)      | 1.388(2)   |
| C(19)-C(20)      | 1.383(2)   |
| C(20)-C(21)      | 1.383(2)   |
| C(22)-C(23)      | 1.387(2)   |
| C(22)-C(27)      | 1.392(2)   |
| C(23)-C(24)      | 1.385(2)   |
| C(24)-C(25)      | 1.378(3)   |
| C(25)-C(26)      | 1.381(3)   |
| C(26)-C(27)      | 1.382(2)   |
| C(1S)-C(2S)      | 1.353(4)   |
| C(1S)-C(6S)      | 1.376(4)   |
| C(2S)-C(3S)      | 1.334(4)   |
| C(3S)-C(4S)      | 1.357(3)   |
| C(4S)-C(5S)      | 1.354(4)   |
| C(5S)-C(6S)      | 1.370(4)   |
| C(7S)-C(12S)     | 1.362(4)   |
| C(7S)-C(8S)      | 1.360(4)   |
| C(8S)-C(9S)      | 1.347(4)   |
| C(9S)-C(10S)     | 1.356(4)   |
| C(10S)-C(11S)    | 1.353(3)   |
| C(11S)-C(12S)    | 1.352(3)   |
|                  |            |
| C(6)-O(1)-C(1)   | 116.44(11) |
| C(29)-O(5)-C(12) | 114.42(14) |
| C(10)-O(6)-C(30) | 118.08(14) |
| C(8)-O(7)-C(31)  | 116.76(13) |
| C(19)-O(8)-C(32) | 117.31(13) |
| C(11)-N(1)-C(12) | 130.00(14) |
| C(11)-N(1)-C(15) | 119.35(14) |
| C(12)-N(1)-C(15) | 110.54(13) |
| O(1)-C(1)-C(16)  | 103.51(11) |
| O(1)-C(1)-C(28)  | 106.30(11) |
| C(16)-C(1)-C(28) | 117.17(12) |
| O(1)-C(1)-C(2)   | 108.00(11) |
| C(16)-C(1)-C(2)  | 117.02(12) |

|                   |            |
|-------------------|------------|
| C(28)-C(1)-C(2)   | 104.15(11) |
| C(22)-C(2)-C(3)   | 110.37(12) |
| C(22)-C(2)-C(1)   | 119.00(12) |
| C(3)-C(2)-C(1)    | 104.41(11) |
| C(11)-C(3)-C(4)   | 112.59(12) |
| C(11)-C(3)-C(2)   | 114.16(12) |
| C(4)-C(3)-C(2)    | 102.95(11) |
| O(3)-C(4)-C(5)    | 113.31(12) |
| O(3)-C(4)-C(28)   | 109.55(11) |
| C(5)-C(4)-C(28)   | 108.54(12) |
| O(3)-C(4)-C(3)    | 113.03(12) |
| C(5)-C(4)-C(3)    | 111.31(11) |
| C(28)-C(4)-C(3)   | 100.20(11) |
| C(6)-C(5)-C(10)   | 116.67(14) |
| C(6)-C(5)-C(4)    | 118.62(13) |
| C(10)-C(5)-C(4)   | 124.58(14) |
| O(1)-C(6)-C(5)    | 121.89(13) |
| O(1)-C(6)-C(7)    | 115.08(13) |
| C(5)-C(6)-C(7)    | 123.01(14) |
| C(8)-C(7)-C(6)    | 117.85(15) |
| O(7)-C(8)-C(7)    | 124.27(15) |
| O(7)-C(8)-C(9)    | 114.48(14) |
| C(7)-C(8)-C(9)    | 121.22(15) |
| C(10)-C(9)-C(8)   | 119.15(15) |
| C(9)-C(10)-O(6)   | 122.63(14) |
| C(9)-C(10)-C(5)   | 121.97(15) |
| O(6)-C(10)-C(5)   | 115.39(14) |
| O(4)-C(11)-N(1)   | 120.53(14) |
| O(4)-C(11)-C(3)   | 121.22(13) |
| N(1)-C(11)-C(3)   | 118.13(13) |
| O(5)-C(12)-N(1)   | 110.90(14) |
| O(5)-C(12)-C(13)  | 107.05(16) |
| N(1)-C(12)-C(13)  | 102.23(15) |
| C(12)-C(13)-C(14) | 103.22(17) |
| C(15)-C(14)-C(13) | 104.35(16) |
| N(1)-C(15)-C(14)  | 104.68(15) |
| C(17)-C(16)-C(21) | 117.56(14) |

|                      |            |
|----------------------|------------|
| C(17)-C(16)-C(1)     | 120.00(13) |
| C(21)-C(16)-C(1)     | 122.29(13) |
| C(18)-C(17)-C(16)    | 121.88(14) |
| C(17)-C(18)-C(19)    | 119.50(15) |
| O(8)-C(19)-C(20)     | 116.10(14) |
| O(8)-C(19)-C(18)     | 124.35(14) |
| C(20)-C(19)-C(18)    | 119.55(15) |
| C(21)-C(20)-C(19)    | 120.35(15) |
| C(20)-C(21)-C(16)    | 121.10(15) |
| C(23)-C(22)-C(27)    | 118.36(15) |
| C(23)-C(22)-C(2)     | 119.33(14) |
| C(27)-C(22)-C(2)     | 122.14(13) |
| C(24)-C(23)-C(22)    | 120.78(18) |
| C(25)-C(24)-C(23)    | 120.19(17) |
| C(24)-C(25)-C(26)    | 119.71(17) |
| C(27)-C(26)-C(25)    | 120.14(18) |
| C(26)-C(27)-C(22)    | 120.81(16) |
| O(2)-C(28)-C(4)      | 109.52(12) |
| O(2)-C(28)-C(1)      | 111.68(12) |
| C(4)-C(28)-C(1)      | 100.33(11) |
| C(2S)-C(1S)-C(6S)    | 119.5(3)   |
| C(3S)-C(2S)-C(1S)    | 120.6(2)   |
| C(2S)-C(3S)-C(4S)    | 120.7(2)   |
| C(5S)-C(4S)-C(3S)    | 120.2(3)   |
| C(4S)-C(5S)-C(6S)    | 119.4(2)   |
| C(5S)-C(6S)-C(1S)    | 119.6(2)   |
| C(12S)-C(7S)-C(8S)   | 120.1(2)   |
| C(9S)-C(8S)-C(7S)    | 120.0(2)   |
| C(8S)-C(9S)-C(10S)   | 119.9(2)   |
| C(9S)-C(10S)-C(11S)  | 120.2(2)   |
| C(12S)-C(11S)-C(10S) | 120.2(2)   |
| C(11S)-C(12S)-C(7S)  | 119.4(2)   |

---

Symmetry transformations used to generate equivalent atoms:

Anisotropic displacement parameters ( $\text{\AA}^2 \times 10^3$ ) for compound **3**. The anisotropic displacement factor exponent takes the form:  $-2\pi^2 [ h^2 a^{*2} U^{11} + \dots + 2 h k a^* b^* U^{12} ]$

|       | U <sup>11</sup> | U <sup>22</sup> | U <sup>33</sup> | U <sup>23</sup> | U <sup>13</sup> | U <sup>12</sup> |
|-------|-----------------|-----------------|-----------------|-----------------|-----------------|-----------------|
| O(1)  | 21(1)           | 27(1)           | 26(1)           | -5(1)           | -6(1)           | -12(1)          |
| O(2)  | 17(1)           | 34(1)           | 28(1)           | -12(1)          | -1(1)           | -7(1)           |
| O(3)  | 22(1)           | 25(1)           | 28(1)           | -5(1)           | -2(1)           | -4(1)           |
| O(4)  | 22(1)           | 41(1)           | 29(1)           | -10(1)          | 1(1)            | -9(1)           |
| O(5)  | 51(1)           | 58(1)           | 38(1)           | -5(1)           | -16(1)          | -24(1)          |
| O(6)  | 34(1)           | 31(1)           | 35(1)           | 3(1)            | -6(1)           | -16(1)          |
| O(7)  | 31(1)           | 48(1)           | 57(1)           | -7(1)           | -12(1)          | -23(1)          |
| O(8)  | 41(1)           | 36(1)           | 31(1)           | 0(1)            | 0(1)            | -19(1)          |
| N(1)  | 27(1)           | 41(1)           | 24(1)           | -2(1)           | -3(1)           | -14(1)          |
| C(1)  | 18(1)           | 28(1)           | 22(1)           | -8(1)           | -2(1)           | -10(1)          |
| C(2)  | 18(1)           | 27(1)           | 23(1)           | -8(1)           | -1(1)           | -7(1)           |
| C(3)  | 18(1)           | 26(1)           | 23(1)           | -8(1)           | -2(1)           | -7(1)           |
| C(4)  | 19(1)           | 23(1)           | 23(1)           | -7(1)           | -2(1)           | -5(1)           |
| C(5)  | 22(1)           | 25(1)           | 25(1)           | -10(1)          | 0(1)            | -9(1)           |
| C(6)  | 21(1)           | 26(1)           | 23(1)           | -10(1)          | 1(1)            | -11(1)          |
| C(7)  | 24(1)           | 30(1)           | 30(1)           | -11(1)          | -5(1)           | -10(1)          |
| C(8)  | 23(1)           | 36(1)           | 40(1)           | -16(1)          | -2(1)           | -14(1)          |
| C(9)  | 29(1)           | 32(1)           | 38(1)           | -9(1)           | 1(1)            | -18(1)          |
| C(10) | 28(1)           | 25(1)           | 28(1)           | -9(1)           | -2(1)           | -9(1)           |
| C(11) | 23(1)           | 28(1)           | 23(1)           | -9(1)           | 0(1)            | -10(1)          |
| C(12) | 32(1)           | 45(1)           | 31(1)           | -4(1)           | -10(1)          | -13(1)          |
| C(13) | 46(1)           | 49(1)           | 51(1)           | 6(1)            | -19(1)          | -16(1)          |
| C(14) | 54(1)           | 62(1)           | 42(1)           | 14(1)           | -14(1)          | -29(1)          |
| C(15) | 40(1)           | 49(1)           | 25(1)           | 0(1)            | -1(1)           | -22(1)          |
| C(16) | 22(1)           | 28(1)           | 22(1)           | -6(1)           | -5(1)           | -12(1)          |
| C(17) | 22(1)           | 32(1)           | 26(1)           | -9(1)           | -1(1)           | -10(1)          |
| C(18) | 30(1)           | 25(1)           | 31(1)           | -5(1)           | -6(1)           | -9(1)           |
| C(19) | 31(1)           | 34(1)           | 24(1)           | -2(1)           | -4(1)           | -18(1)          |
| C(20) | 28(1)           | 38(1)           | 26(1)           | -8(1)           | 4(1)            | -12(1)          |
| C(21) | 28(1)           | 29(1)           | 27(1)           | -7(1)           | -1(1)           | -9(1)           |
| C(22) | 29(1)           | 27(1)           | 22(1)           | -5(1)           | -6(1)           | -11(1)          |
| C(23) | 35(1)           | 34(1)           | 34(1)           | -13(1)          | -4(1)           | -13(1)          |
| C(24) | 54(1)           | 39(1)           | 43(1)           | -22(1)          | -6(1)           | -15(1)          |
| C(25) | 67(1)           | 42(1)           | 40(1)           | -11(1)          | -17(1)          | -29(1)          |



|        |        |        |        |        |        |        |
|--------|--------|--------|--------|--------|--------|--------|
| C(26)  | 45(1)  | 48(1)  | 38(1)  | -7(1)  | -11(1) | -27(1) |
| C(27)  | 33(1)  | 38(1)  | 35(1)  | -13(1) | -5(1)  | -16(1) |
| C(28)  | 18(1)  | 26(1)  | 24(1)  | -10(1) | -2(1)  | -7(1)  |
| C(29)  | 63(1)  | 56(1)  | 53(1)  | -9(1)  | -20(1) | -29(1) |
| C(30)  | 55(1)  | 42(1)  | 45(1)  | 7(1)   | -7(1)  | -31(1) |
| C(31)  | 29(1)  | 50(1)  | 68(1)  | -13(1) | -18(1) | -17(1) |
| C(32)  | 47(1)  | 35(1)  | 47(1)  | 5(1)   | -10(1) | -21(1) |
| C(1S)  | 105(2) | 68(2)  | 77(2)  | 21(1)  | -52(2) | -54(2) |
| C(2S)  | 108(2) | 58(1)  | 41(1)  | -6(1)  | -19(1) | -29(2) |
| C(3S)  | 54(1)  | 95(2)  | 49(1)  | -17(1) | -2(1)  | -15(1) |
| C(4S)  | 71(2)  | 108(2) | 64(2)  | -29(2) | -14(1) | -43(2) |
| C(5S)  | 86(2)  | 64(2)  | 67(2)  | -35(1) | 8(1)   | -27(1) |
| C(6S)  | 45(1)  | 53(1)  | 106(2) | 8(2)   | -7(2)  | -16(1) |
| C(7S)  | 73(2)  | 55(2)  | 87(2)  | 14(1)  | -21(2) | -18(1) |
| C(8S)  | 70(2)  | 135(3) | 38(1)  | -5(2)  | -15(1) | -36(2) |
| C(9S)  | 50(1)  | 112(2) | 85(2)  | -64(2) | 5(1)   | -35(2) |
| C(10S) | 38(1)  | 46(1)  | 97(2)  | -7(1)  | -8(1)  | -20(1) |
| C(11S) | 50(1)  | 88(2)  | 41(1)  | -1(1)  | -16(1) | -35(1) |
| C(12S) | 60(2)  | 72(2)  | 78(2)  | -39(1) | -8(1)  | -26(1) |

---

Hydrogen coordinates ( $\times 10^4$ ) and isotropic displacement parameters ( $\text{\AA}^2 \times 10^{-3}$ )  
for compound **3**.

---

|        | x         | y         | z         | U(eq) |
|--------|-----------|-----------|-----------|-------|
| H(2O)  | 15220(20) | -3938(18) | -5302(15) | 50(6) |
| H(3O)  | 13110(20) | -5678(19) | -3328(16) | 60(7) |
| H(2)   | 10911(16) | -1745(13) | -3825(10) | 19(4) |
| H(3)   | 13268(17) | -3347(14) | -3322(11) | 26(4) |
| H(7)   | 9243(16)  | -2402(15) | -5298(12) | 30(4) |
| H(9)   | 9231(18)  | -5329(16) | -3275(12) | 36(5) |
| H(12)  | 14030(17) | -4778(15) | -2290(13) | 35(5) |
| H(13B) | 13580(20) | -6472(19) | -1393(15) | 58(6) |
| H(13A) | 14260(20) | -6195(19) | -728(15)  | 61(6) |
| H(14B) | 11950(20) | -6250(20) | -1(16)    | 67(7) |

|        |           |           |           |       |
|--------|-----------|-----------|-----------|-------|
| H(14A) | 12210(30) | -5180(20) | 202(19)   | 90(9) |
| H(15B) | 10620(18) | -3892(16) | -492(12)  | 38(5) |
| H(15A) | 10690(20) | -4893(18) | -1002(14) | 52(6) |
| H(17)  | 11152(16) | 144(14)   | -5320(11) | 27(4) |
| H(18)  | 11660(17) | 1596(16)  | -6522(12) | 34(5) |
| H(20)  | 14990(19) | -954(16)  | -7708(13) | 44(5) |
| H(21)  | 14415(18) | -2415(17) | -6517(12) | 40(5) |
| H(23)  | 10360(20) | -176(16)  | -3126(13) | 41(5) |
| H(24)  | 10830(20) | 1111(19)  | -2636(15) | 56(6) |
| H(25)  | 13010(20) | 1023(19)  | -3078(15) | 57(6) |
| H(26)  | 14640(20) | -378(18)  | -3939(14) | 51(6) |
| H(27)  | 14186(18) | -1727(16) | -4372(12) | 37(5) |
| H(28)  | 13523(15) | -3909(14) | -5448(11) | 25(4) |
| H(29A) | 12861     | -2401     | -1914     | 79    |
| H(29B) | 14405     | -3039     | -2356     | 79    |
| H(29C) | 13929     | -2510     | -1435     | 79    |
| H(30A) | 10594     | -6939     | -2464     | 72    |
| H(30B) | 9877      | -5914     | -1854     | 72    |
| H(30C) | 11252     | -6967     | -1711     | 72    |
| H(31A) | 7839      | -2979     | -5623     | 69    |
| H(31B) | 7031      | -2154     | -4854     | 69    |
| H(31C) | 6447      | -3019     | -4970     | 69    |
| H(32A) | 13002     | 2740      | -7404     | 67    |
| H(32B) | 12128     | 2692      | -7974     | 67    |
| H(32C) | 13419     | 3007      | -8513     | 67    |
| H(1SA) | 9334      | -714      | 823       | 91    |
| H(2SA) | 7068      | 117       | 1324      | 84    |
| H(3SA) | 5754      | 52        | 569       | 88    |
| H(4SA) | 6666      | -867      | -694      | 90    |
| H(5SA) | 8932      | -1713     | -1222     | 90    |
| H(6SA) | 10286     | -1634     | -465      | 94    |
| H(7SA) | 11793     | 8827      | 1215      | 97    |
| H(8SA) | 12579     | 7476      | 249       | 101   |
| H(9SA) | 13429     | 5448      | 818       | 90    |
| H(10A) | 13457     | 4762      | 2361      | 75    |
| H(11A) | 12647     | 6102      | 3332      | 68    |
| H(12A) | 11863     | 8139      | 2757      | 79    |

---

Hydrogen bonds for compound **3**. [ $\text{\AA}$  and  $^\circ$ ].

---

| D-H...A             | d(D-H)  | d(H...A) | d(D...A)   | $\angle$ (DHA) |
|---------------------|---------|----------|------------|----------------|
| O(2)-H(2O)...O(3)#1 | 0.87(2) | 1.87(2)  | 2.7354(15) | 174(2)         |
| O(3)-H(3O)...O(6)   | 0.85(2) | 1.86(2)  | 2.6228(16) | 148(2)         |

---

Symmetry transformations used to generate equivalent atoms:

#1  $-x+3, -y-1, -z-1$

**X-ray crystallographic data for Elliptifoline (+/-)-4**  
**(Relative stereochemistry)**

Crystals of compound **4** suitable for X-ray analysis were obtained by slow evaporation from CH<sub>2</sub>Cl<sub>2</sub>/isooctane. Crystallographic data has been deposited with the Cambridge Crystallographic Data Centre (CCDC #833988). Copies of the data can be obtained free of charge on application to the CCDC, 12 Union Road, Cambridge CB21EZ, UK (fax: (+44)- 1223-336-033; e-mail: [deposit@ccdc.cam.ac.uk](mailto:deposit@ccdc.cam.ac.uk)).

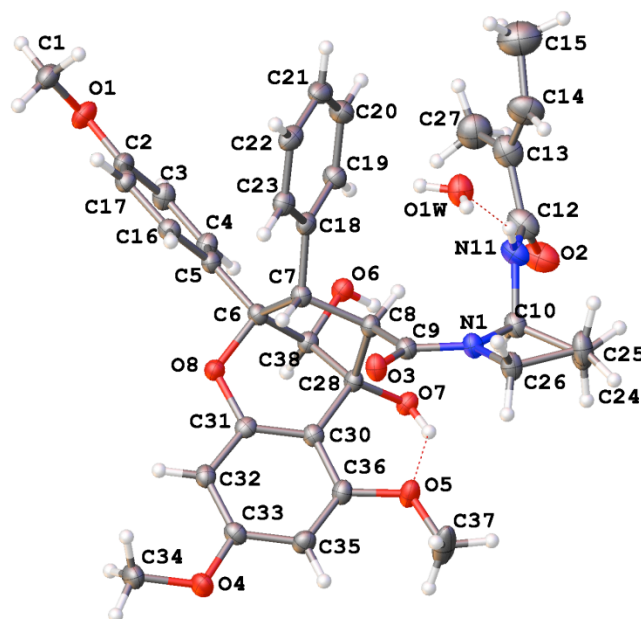

**Table SI-6.** Crystal data and structure refinement for natural product elliptifoline **4**.

Identification code 833988

**Crystal data**

|                                 |                                                         |
|---------------------------------|---------------------------------------------------------|
| $C_{36}H_{40}N_2O_8 \cdot H_2O$ | $V = 7317.1 (7) \text{ \AA}^3$                          |
| $M_r = 646.72$                  | $Z = 8$                                                 |
| Orthorhombic, <i>Pbcn</i>       | Cu $K\alpha$ radiation, $\lambda = 1.54178 \text{ \AA}$ |
| $a = 24.1823 (14) \text{ \AA}$  | $\mu = 0.69 \text{ mm}^{-1}$                            |
| $b = 12.2311 (7) \text{ \AA}$   | $T = 100 \text{ K}$                                     |
| $c = 24.7388 (13) \text{ \AA}$  | $0.12 \times 0.11 \times 0.09 \text{ mm}$               |

## Data collection

|                                                                   |                                        |
|-------------------------------------------------------------------|----------------------------------------|
| Bruker Proteum-R diffractometer                                   | 6426 independent reflections           |
| Absorption correction: multi-scan <i>SADABS</i> (Sheldrick, 1996) | 5972 reflections with $I > 2\sigma(I)$ |
| $T_{\min} = 0.696$ , $T_{\max} = 0.753$                           | $R_{\text{int}} = 0.051$               |
| 148848 measured reflections                                       |                                        |

## Refinement

|                                 |                                                                        |
|---------------------------------|------------------------------------------------------------------------|
| $R[F^2 > 2\sigma(F^2)] = 0.061$ | 0 restraints                                                           |
| $wR(F^2) = 0.167$               | H atoms treated by a mixture of independent and constrained refinement |
| $S = 1.05$                      | $\Delta_{\text{max}} = 1.00 \text{ e \AA}^{-3}$                        |
| 6426 reflections                | $\Delta_{\text{min}} = -0.42 \text{ e \AA}^{-3}$                       |
| 437 parameters                  |                                                                        |

Data collection: *APEX2* (Bruker, 2006); cell refinement: *S SAINT* (Bruker, 2006); data reduction: *S SAINT* (Bruker, 2006); program(s) used to solve structure: *SHELXS97* (Sheldrick, 1990); program(s) used to refine structure: *SHELXL97* (Sheldrick, 1997); molecular graphics: *OLEX2* (Dolmanov, *et al.* 2009); software used to prepare material for publication: *PublCIF v.1.9.5\_c* (IUCr).

## References

- Sheldrick, G. M. (1996). *SADABS*. University of Göttingen, Germany.
- Sheldrick, G. M. (1997). *SHELXL97*. University of Göttingen, Germany.
- Bruker (2006). *S SAINT*. Bruker Analytical X-ray Instruments Inc., Madison, Wisconsin, USA.
- Bruker (2006). *APEX2*. Bruker Analytical X-ray Instruments Inc., Madison, Wisconsin, USA.
- Dolmanov, O. V., *et al.* (2009). *OLEX2*: A complete structure solution, refinement and analysis program. *J. Appl. Cryst.* 42, 339-341 (2009).
- Spek, A. L. (2005). *PLATON*, A Multipurpose Crystallographic Tool, Utrecht University, Utrecht, The Netherlands.

## Supplementary materials

### Crystal data

|                                 |                                                         |
|---------------------------------|---------------------------------------------------------|
| $C_{36}H_{40}N_2O_8 \cdot H_2O$ | $F(000) = 2752$                                         |
| $M_r = 646.72$                  | $D_x = 1.174 \text{ Mg m}^{-3}$                         |
| Orthorhombic, $Pbcn$            | Cu $K\alpha$ radiation, $\lambda = 1.54178 \text{ \AA}$ |
| Hall symbol: $-P\ 2n\ 2ab$      | Cell parameters from 9098 reflections                   |
| $a = 24.1823 (14) \text{ \AA}$  | $\theta = 3.6\text{--}65.8^\circ$                       |
| $b = 12.2311 (7) \text{ \AA}$   | $\mu = 0.69 \text{ mm}^{-1}$                            |
| $c = 24.7388 (13) \text{ \AA}$  | $T = 100 \text{ K}$                                     |
| $V = 7317.1 (7) \text{ \AA}^3$  | Prism, colorless                                        |
| $Z = 8$                         | $0.12 \times 0.11 \times 0.09 \text{ mm}$               |

### Data collection

|                                                                   |                                                                        |
|-------------------------------------------------------------------|------------------------------------------------------------------------|
| Bruker Proteum-R diffractometer                                   | 6426 independent reflections                                           |
| Radiation source: rotating anode multilayer                       | 5972 reflections with $I > 2\sigma(I)$                                 |
| $\phi$ & $\omega$ scans                                           | $R_{\text{int}} = 0.051$                                               |
| Absorption correction: multi-scan <i>SADABS</i> (Sheldrick, 1996) | $\theta_{\text{max}} = 66.5^\circ$ , $\theta_{\text{min}} = 3.6^\circ$ |
| $T_{\text{min}} = 0.696$ , $T_{\text{max}} = 0.753$               | $h = -28 \rightarrow 28$                                               |
| 148848 measured reflections                                       | $k = -14 \rightarrow 14$                                               |
|                                                                   | $l = -29 \rightarrow 27$                                               |

### Refinement

|                                 |                                                                                      |
|---------------------------------|--------------------------------------------------------------------------------------|
| Refinement on $F^2$             | Primary atom site location: structure-invariant direct methods                       |
| Least-squares matrix: full      | Secondary atom site location: difference Fourier map                                 |
| $R[F^2 > 2\sigma(F^2)] = 0.061$ | Hydrogen site location: inferred from neighbouring sites                             |
| $wR(F^2) = 0.167$               | H atoms treated by a mixture of independent and constrained refinement               |
| $S = 1.05$                      | $w = 1/[\sigma^2(F_o^2) + (0.0747P)^2 + 12.3954P]$<br>where $P = (F_o^2 + 2F_c^2)/3$ |

|                  |                                                   |
|------------------|---------------------------------------------------|
| 6426 reflections | $(\Delta/\sigma)_{\max} < 0.001$                  |
| 437 parameters   | $\Delta)_{\max} = 1.00 \text{ e } \text{Å}^{-3}$  |
| 0 restraints     | $\Delta)_{\min} = -0.42 \text{ e } \text{Å}^{-3}$ |

## Special details

**Geometry.** All esds (except the esd in the dihedral angle between two l.s. planes) are estimated using the full covariance matrix. The cell esds are taken into account individually in the estimation of esds in distances, angles and torsion angles; correlations between esds in cell parameters are only used when they are defined by crystal symmetry. An approximate (isotropic) treatment of cell esds is used for estimating esds involving l.s. planes.

**Refinement.** Refinement of  $F^2$  against ALL reflections. The weighted R-factor wR and goodness of fit S are based on  $F^2$ , conventional R-factors R are based on F, with F set to zero for negative  $F^2$ . The threshold expression of  $F^2 > 2\text{sigma}(F^2)$  is used only for calculating R-factors(gt) etc. and is not relevant to the choice of reflections for refinement. R-factors based on  $F^2$  are statistically about twice as large as those based on F, and R- factors based on ALL data will be even larger.

CheckCIF Alerts and Responses:

Alert level A PLAT601\_ALERT\_2\_A Structure Contains Solvent Accessible VOIDS of . 646 Å\*\*3

Response: The void spaces contained disordered, partial occupancy solvent molecules. After unsuccessful attempts to assign and refine solvent molecules, PLATON/SQUEEZE (Spek, 2005) was applied to remove the residual density peaks in the voids.

Alert level B DIFMX01\_ALERT\_2\_B The maximum difference density is  $> 0.1 * Z_{\max} * 1.00$  \_refine\_diff\_density\_max given = 1.004 Test value = 0.800  
PLAT420\_ALERT\_2\_B D-H Without Acceptor O1W - H1WA ... ? Alert level C

DIFMX02\_ALERT\_1\_C The maximum difference density is  $> 0.1 * Z_{\max} * 0.75$   
The relevant atom site should be identified. PLAT097\_ALERT\_2\_B Large Reported Max. (Positive) Residual Density 1.00 eÅ<sup>-3</sup> PLAT094\_ALERT\_2\_C Ratio of Maximum

/ Minimum Residual Density ... 2.40

Response: These alerts arise due to several residual density peaks in the region of C13, C14, C15 and C27. It appears that there is a slight rotational disorder in this pendant group, possibly corresponding to a torsional rotation about the C10-N11 bond.

Refinement of a disorder was attempted, but the refinement was not stable, probably due to the SQUEEZE correction. Refinement with the un-SQUEEZEd data was also attempted, but again ADPs and bond distances were not stable for the minor component, possibly due to the un-accounted-for electron density of the disordered solvent nearby. In all cases the major component was well behaved and refined to a fractional occupancy greater than 0.85, meaning that the single component description provides an adequate model for the purposes of this study. Further refinement of the disorder was therefore not attempted.

PLAT042\_ALERT\_1\_C Calc. and Reported MoietyFormula Strings Differ ?

Response: This alert is incorrect; the formulas match exactly.

PLAT220\_ALERT\_2\_C Large Non-Solvent C Ueq(max)/Ueq(min) ... 3.7 Ratio

PLAT222\_ALERT\_3\_C Large Non-Solvent H Uiso(max)/Uiso(min) .. 4.6 Ratio

PLAT230\_ALERT\_2\_C Hirshfeld Test Diff for C14 – C15 .. 5.3 su

Response: These alerts also arised due to the slight disorder, which results in larger-than-normal ADPs, particularly for the terminal methyl carbon, C15, which further triggers the Hirshfeld test alert.

## Fractional atomic coordinates and isotropic or equivalent isotropic displacement parameters ( $\text{\AA}^2$ )

|    | <i>x</i>    | <i>y</i>     | <i>z</i>    | $U_{\text{iso}}^*/U_{\text{eq}}$ |  |
|----|-------------|--------------|-------------|----------------------------------|--|
| O1 | 0.65939 (7) | 0.76166 (14) | 0.41089 (7) | 0.0303 (4)                       |  |
| O2 | 0.59242 (8) | 0.04097 (19) | 0.26062 (8) | 0.0430 (5)                       |  |
| O3 | 0.44870 (7) | 0.12637 (13) | 0.45243 (6) | 0.0245 (4)                       |  |
| O4 | 0.25832 (7) | 0.40085 (14) | 0.43582 (7) | 0.0279 (4)                       |  |
| O5 | 0.36672 (7) | 0.13888 (13) | 0.34146 (7) | 0.0278 (4)                       |  |
| O6 | 0.54565 (6) | 0.35068 (13) | 0.30354 (6) | 0.0222 (4)                       |  |
| H6 | 0.5403      | 0.3186       | 0.2740      | 0.027*                           |  |
| O7 | 0.45475 (7) | 0.21678 (13) | 0.28945 (6) | 0.0217 (4)                       |  |
| H7 | 0.4310      | 0.1672       | 0.2927      | 0.026*                           |  |



|      |              |              |              |             |  |
|------|--------------|--------------|--------------|-------------|--|
| N1   | 0.48591 (8)  | 0.01825 (15) | 0.38838 (8)  | 0.0219 (4)  |  |
| O8   | 0.44981 (6)  | 0.46722 (13) | 0.40169 (6)  | 0.0208 (3)  |  |
| C1   | 0.67899 (11) | 0.7873 (2)   | 0.46375 (11) | 0.0308 (6)  |  |
| H1A  | 0.6961       | 0.7223       | 0.4798       | 0.046*      |  |
| H1B  | 0.6480       | 0.8112       | 0.4863       | 0.046*      |  |
| H1C  | 0.7064       | 0.8460       | 0.4614       | 0.046*      |  |
| C2   | 0.62044 (10) | 0.68032 (19) | 0.40752 (10) | 0.0236 (5)  |  |
| C3   | 0.60572 (11) | 0.6489 (2)   | 0.35552 (10) | 0.0263 (5)  |  |
| H3   | 0.6218       | 0.6843       | 0.3252       | 0.032*      |  |
| C4   | 0.56749 (10) | 0.56580 (19) | 0.34794 (9)  | 0.0237 (5)  |  |
| H4   | 0.5571       | 0.5457       | 0.3123       | 0.028*      |  |
| C5   | 0.54405 (9)  | 0.51130 (18) | 0.39184 (9)  | 0.0204 (5)  |  |
| C6   | 0.50307 (9)  | 0.41958 (18) | 0.38483 (9)  | 0.0197 (5)  |  |
| C7   | 0.51335 (9)  | 0.31234 (18) | 0.41983 (9)  | 0.0194 (5)  |  |
| H7A  | 0.4855       | 0.3118       | 0.4497       | 0.023*      |  |
| C8   | 0.49935 (10) | 0.21613 (18) | 0.38117 (9)  | 0.0199 (5)  |  |
| H8   | 0.5341       | 0.1934       | 0.3623       | 0.024*      |  |
| C9   | 0.47565 (9)  | 0.11710 (19) | 0.41013 (9)  | 0.0206 (5)  |  |
| C10  | 0.51643 (10) | -0.0055 (2)  | 0.33838 (9)  | 0.0242 (5)  |  |
| H10  | 0.5048       | 0.0457       | 0.3090       | 0.029*      |  |
| N11  | 0.57580 (9)  | 0.00456 (18) | 0.34846 (8)  | 0.0287 (5)  |  |
| H11  | 0.5894       | -0.0100      | 0.3807       | 0.034*      |  |
| C12  | 0.60969 (12) | 0.0364 (3)   | 0.30779 (11) | 0.0377 (7)  |  |
| C13  | 0.66763 (13) | 0.0689 (3)   | 0.32241 (12) | 0.0414 (7)  |  |
| C14  | 0.69552 (12) | 0.0121 (3)   | 0.35938 (13) | 0.0468 (8)  |  |
| H14  | 0.6762       | -0.0437      | 0.3782       | 0.056*      |  |
| C15  | 0.75343 (17) | 0.0294 (4)   | 0.37304 (18) | 0.0709 (11) |  |
| H15A | 0.7686       | 0.0879       | 0.3504       | 0.106*      |  |
| H15B | 0.7742       | -0.0382      | 0.3667       | 0.106*      |  |
| H15C | 0.7565       | 0.0502       | 0.4112       | 0.106*      |  |
| C16  | 0.55831 (9)  | 0.54610 (19) | 0.44344 (9)  | 0.0222 (5)  |  |
| H16  | 0.5419       | 0.5116       | 0.4739       | 0.027*      |  |
| C17  | 0.59618 (10) | 0.63035 (19) | 0.45166 (9)  | 0.0223 (5)  |  |
| H17  | 0.6052       | 0.6532       | 0.4873       | 0.027*      |  |
| C18  | 0.56975 (10) | 0.29809 (18) | 0.44514 (9)  | 0.0212 (5)  |  |
| C19  | 0.61764 (10) | 0.2884 (2)   | 0.41437 (10) | 0.0255 (5)  |  |
| H19  | 0.6156       | 0.2948       | 0.3761       | 0.031*      |  |
| C20  | 0.66822 (11) | 0.2696 (2)   | 0.43884 (11) | 0.0305 (6)  |  |
| H20  | 0.7006       | 0.2634       | 0.4173       | 0.037*      |  |
| C21  | 0.67192 (11) | 0.2598 (2)   | 0.49454 (11) | 0.0300 (6)  |  |
| H21  | 0.7066       | 0.2454       | 0.5112       | 0.036*      |  |

|      |              |               |              |             |  |
|------|--------------|---------------|--------------|-------------|--|
| C22  | 0.62469 (11) | 0.2711 (2)    | 0.52580 (10) | 0.0277 (5)  |  |
| H22  | 0.6271       | 0.2660        | 0.5640       | 0.033*      |  |
| C23  | 0.57390 (10) | 0.28990 (19)  | 0.50147 (9)  | 0.0236 (5)  |  |
| H23  | 0.5417       | 0.2973        | 0.5232       | 0.028*      |  |
| C24  | 0.49777 (12) | -0.1221 (2)   | 0.32536 (10) | 0.0313 (6)  |  |
| H24A | 0.4626       | -0.1219       | 0.3048       | 0.038*      |  |
| H24B | 0.5262       | -0.1614       | 0.3042       | 0.038*      |  |
| C25  | 0.49016 (13) | -0.1736 (2)   | 0.38089 (11) | 0.0335 (6)  |  |
| H25A | 0.4652       | -0.2376       | 0.3791       | 0.040*      |  |
| H25B | 0.5261       | -0.1968       | 0.3963       | 0.040*      |  |
| C26  | 0.46455 (11) | -0.08182 (19) | 0.41408 (10) | 0.0257 (5)  |  |
| H26A | 0.4237       | -0.0845       | 0.4123       | 0.031*      |  |
| H26B | 0.4763       | -0.0863       | 0.4524       | 0.031*      |  |
| C27  | 0.68963 (15) | 0.1641 (3)    | 0.29232 (14) | 0.0518 (8)  |  |
| H27A | 0.6970       | 0.1429        | 0.2548       | 0.078*      |  |
| H27B | 0.7240       | 0.1889        | 0.3093       | 0.078*      |  |
| H27C | 0.6624       | 0.2234        | 0.2930       | 0.078*      |  |
| C28  | 0.46081 (9)  | 0.27235 (18)  | 0.33928 (9)  | 0.0192 (5)  |  |
| C30  | 0.40652 (9)  | 0.30522 (19)  | 0.36592 (9)  | 0.0205 (5)  |  |
| C31  | 0.40403 (9)  | 0.40252 (18)  | 0.39444 (9)  | 0.0196 (5)  |  |
| C32  | 0.35521 (10) | 0.43984 (19)  | 0.41827 (9)  | 0.0214 (5)  |  |
| H32  | 0.3540       | 0.5078        | 0.4368       | 0.026*      |  |
| C33  | 0.30861 (10) | 0.37468 (19)  | 0.41400 (9)  | 0.0224 (5)  |  |
| C34  | 0.25548 (11) | 0.4966 (2)    | 0.46835 (11) | 0.0309 (6)  |  |
| H34A | 0.2639       | 0.5609        | 0.4462       | 0.046*      |  |
| H34B | 0.2824       | 0.4912        | 0.4978       | 0.046*      |  |
| H34C | 0.2182       | 0.5038        | 0.4835       | 0.046*      |  |
| C35  | 0.31018 (10) | 0.2727 (2)    | 0.38846 (10) | 0.0250 (5)  |  |
| H35  | 0.2781       | 0.2278        | 0.3869       | 0.030*      |  |
| C36  | 0.35944 (10) | 0.23860 (19)  | 0.36550 (9)  | 0.0222 (5)  |  |
| C37  | 0.32367 (14) | 0.0602 (3)    | 0.34457 (15) | 0.0543 (10) |  |
| H37A | 0.2896       | 0.0911        | 0.3294       | 0.081*      |  |
| H37B | 0.3175       | 0.0401        | 0.3824       | 0.081*      |  |
| H37C | 0.3342       | -0.0050       | 0.3240       | 0.081*      |  |
| C38  | 0.49407 (9)  | 0.37621 (18)  | 0.32756 (9)  | 0.0199 (5)  |  |
| H38  | 0.4725       | 0.4290        | 0.3050       | 0.024*      |  |
| O1W  | 0.60059 (9)  | 0.00666 (18)  | 0.46674 (8)  | 0.0341 (4)  |  |
| H1WA | 0.6010 (18)  | 0.072 (4)     | 0.4754 (18)  | 0.077 (14)* |  |
| H1WB | 0.5810 (15)  | -0.034 (3)    | 0.4934 (16)  | 0.057 (10)* |  |

**Atomic displacement parameters ( $\text{\AA}^2$ )**

|     | $U^{11}$    | $U^{22}$    | $U^{33}$    | $U^{12}$     | $U^{13}$     | $U^{23}$     |
|-----|-------------|-------------|-------------|--------------|--------------|--------------|
| O1  | 0.0352 (10) | 0.0263 (9)  | 0.0293 (9)  | -0.0122 (8)  | 0.0003 (7)   | -0.0019 (7)  |
| O2  | 0.0397 (11) | 0.0634 (14) | 0.0259 (10) | 0.0069 (10)  | 0.0067 (8)   | 0.0109 (9)   |
| O3  | 0.0320 (9)  | 0.0206 (8)  | 0.0210 (8)  | -0.0002 (7)  | 0.0090 (7)   | 0.0010 (6)   |
| O4  | 0.0232 (9)  | 0.0288 (9)  | 0.0317 (9)  | 0.0015 (7)   | 0.0065 (7)   | -0.0055 (7)  |
| O5  | 0.0311 (9)  | 0.0228 (9)  | 0.0296 (9)  | -0.0073 (7)  | 0.0108 (7)   | -0.0071 (7)  |
| O6  | 0.0238 (8)  | 0.0245 (8)  | 0.0183 (8)  | -0.0030 (7)  | 0.0044 (6)   | -0.0015 (6)  |
| O7  | 0.0244 (8)  | 0.0232 (8)  | 0.0176 (8)  | -0.0046 (6)  | 0.0028 (6)   | -0.0014 (6)  |
| N1  | 0.0266 (10) | 0.0197 (10) | 0.0194 (10) | 0.0016 (8)   | 0.0060 (8)   | 0.0017 (8)   |
| O8  | 0.0201 (8)  | 0.0199 (8)  | 0.0223 (8)  | -0.0009 (6)  | 0.0013 (6)   | -0.0017 (6)  |
| C1  | 0.0326 (13) | 0.0262 (13) | 0.0337 (14) | -0.0044 (11) | -0.0062 (11) | -0.0031 (11) |
| C2  | 0.0222 (12) | 0.0189 (11) | 0.0298 (13) | -0.0014 (9)  | -0.0004 (10) | -0.0018 (9)  |
| C3  | 0.0322 (13) | 0.0239 (12) | 0.0229 (12) | -0.0039 (10) | 0.0067 (10)  | 0.0009 (10)  |
| C4  | 0.0305 (13) | 0.0225 (12) | 0.0182 (11) | -0.0020 (10) | 0.0005 (9)   | -0.0004 (9)  |
| C5  | 0.0224 (11) | 0.0176 (11) | 0.0213 (11) | 0.0008 (9)   | 0.0008 (9)   | 0.0001 (9)   |
| C6  | 0.0206 (11) | 0.0199 (11) | 0.0186 (11) | 0.0018 (9)   | 0.0017 (9)   | 0.0007 (9)   |
| C7  | 0.0223 (11) | 0.0194 (11) | 0.0166 (10) | 0.0004 (9)   | 0.0032 (9)   | 0.0013 (9)   |
| C8  | 0.0229 (11) | 0.0181 (11) | 0.0187 (11) | -0.0008 (9)  | 0.0024 (9)   | -0.0006 (9)  |
| C9  | 0.0223 (11) | 0.0205 (11) | 0.0190 (11) | 0.0013 (9)   | 0.0010 (9)   | 0.0014 (9)   |
| C10 | 0.0295 (13) | 0.0240 (12) | 0.0191 (11) | 0.0034 (10)  | 0.0039 (9)   | 0.0020 (9)   |
| N11 | 0.0287 (11) | 0.0374 (12) | 0.0201 (10) | 0.0063 (9)   | 0.0066 (8)   | 0.0062 (9)   |
| C12 | 0.0385 (15) | 0.0478 (17) | 0.0268 (14) | 0.0094 (13)  | 0.0080 (12)  | 0.0086 (12)  |
| C13 | 0.0450 (17) | 0.0420 (16) | 0.0373 (15) | 0.0027 (13)  | 0.0104 (13)  | 0.0046 (13)  |
| C14 | 0.0332 (15) | 0.0568 (19) | 0.0502 (18) | -0.0044 (14) | 0.0115 (13)  | 0.0105 (15)  |
| C15 | 0.058 (2)   | 0.087 (3)   | 0.067 (2)   | -0.008 (2)   | -0.006 (2)   | 0.006 (2)    |
| C16 | 0.0220 (11) | 0.0243 (12) | 0.0201 (11) | 0.0004 (9)   | 0.0025 (9)   | 0.0015 (9)   |
| C17 | 0.0250 (12) | 0.0218 (11) | 0.0202 (11) | 0.0007 (9)   | -0.0026 (9)  | -0.0016 (9)  |
| C18 | 0.0253 (12) | 0.0172 (11) | 0.0211 (11) | -0.0001 (9)  | -0.0014 (9)  | 0.0015 (9)   |
| C19 | 0.0261 (12) | 0.0266 (12) | 0.0238 (12) | 0.0014 (10)  | 0.0018 (10)  | 0.0006 (10)  |
| C20 | 0.0243 (12) | 0.0313 (14) | 0.0360 (14) | 0.0025 (10)  | 0.0006 (11)  | -0.0026 (11) |
| C21 | 0.0270 (13) | 0.0240 (12) | 0.0389 (14) | 0.0017 (10)  | -0.0086 (11) | 0.0026 (11)  |
| C22 | 0.0345 (14) | 0.0226 (12) | 0.0261 (13) | -0.0039 (10) | -0.0075 (10) | 0.0049 (10)  |
| C23 | 0.0284 (12) | 0.0199 (11) | 0.0224 (12) | -0.0020 (9)  | 0.0011 (9)   | 0.0031 (9)   |
| C24 | 0.0452 (15) | 0.0240 (12) | 0.0248 (12) | 0.0013 (11)  | 0.0086 (11)  | -0.0019 (10) |
| C25 | 0.0505 (17) | 0.0201 (12) | 0.0300 (13) | 0.0034 (11)  | 0.0125 (12)  | 0.0000 (10)  |
| C26 | 0.0344 (13) | 0.0193 (12) | 0.0235 (12) | 0.0000 (10)  | 0.0081 (10)  | 0.0033 (9)   |
| C27 | 0.0522 (19) | 0.0508 (19) | 0.0524 (19) | -0.0062 (16) | 0.0095 (16)  | 0.0050 (16)  |
| C28 | 0.0219 (11) | 0.0193 (11) | 0.0165 (10) | -0.0008 (9)  | 0.0024 (9)   | -0.0018 (9)  |
| C30 | 0.0225 (12) | 0.0213 (11) | 0.0176 (11) | 0.0009 (9)   | 0.0024 (9)   | 0.0018 (9)   |

|     |             |             |             |              |             |              |
|-----|-------------|-------------|-------------|--------------|-------------|--------------|
| C31 | 0.0228 (11) | 0.0214 (11) | 0.0145 (10) | -0.0007 (9)  | -0.0021 (9) | 0.0029 (9)   |
| C32 | 0.0254 (12) | 0.0199 (11) | 0.0189 (11) | 0.0020 (9)   | -0.0012 (9) | 0.0005 (9)   |
| C33 | 0.0218 (11) | 0.0246 (12) | 0.0208 (11) | 0.0024 (9)   | 0.0040 (9)  | 0.0025 (9)   |
| C34 | 0.0285 (13) | 0.0308 (13) | 0.0334 (13) | 0.0051 (11)  | 0.0010 (11) | -0.0086 (11) |
| C35 | 0.0233 (12) | 0.0264 (12) | 0.0251 (12) | -0.0052 (10) | 0.0036 (9)  | -0.0011 (10) |
| C36 | 0.0281 (12) | 0.0200 (11) | 0.0184 (11) | -0.0018 (9)  | 0.0026 (9)  | -0.0008 (9)  |
| C37 | 0.0532 (19) | 0.0340 (16) | 0.076 (2)   | -0.0231 (14) | 0.0365 (18) | -0.0226 (16) |
| C38 | 0.0227 (11) | 0.0198 (11) | 0.0172 (11) | -0.0012 (9)  | 0.0012 (9)  | 0.0018 (9)   |
| O1W | 0.0452 (11) | 0.0296 (10) | 0.0276 (10) | 0.0007 (9)   | 0.0086 (8)  | 0.0024 (8)   |

### Geometric parameters (Å, °)

|        |           |          |           |
|--------|-----------|----------|-----------|
| O1—C2  | 1.372 (3) | C15—H15B | 0.9800    |
| O1—C1  | 1.426 (3) | C15—H15C | 0.9800    |
| O2—C12 | 1.241 (3) | C16—C17  | 1.393 (3) |
| O3—C9  | 1.238 (3) | C16—H16  | 0.9500    |
| O4—C33 | 1.368 (3) | C17—H17  | 0.9500    |
| O4—C34 | 1.423 (3) | C18—C19  | 1.391 (3) |
| O5—C36 | 1.368 (3) | C18—C23  | 1.401 (3) |
| O5—C37 | 1.420 (3) | C19—C20  | 1.384 (4) |
| O6—C38 | 1.416 (3) | C19—H19  | 0.9500    |
| O6—H6  | 0.8400    | C20—C21  | 1.386 (4) |
| O7—C28 | 1.415 (3) | C20—H20  | 0.9500    |
| O7—H7  | 0.8400    | C21—C22  | 1.386 (4) |
| N1—C9  | 1.346 (3) | C21—H21  | 0.9500    |
| N1—C10 | 1.469 (3) | C22—C23  | 1.387 (4) |
| N1—C26 | 1.473 (3) | C22—H22  | 0.9500    |
| O8—C31 | 1.372 (3) | C23—H23  | 0.9500    |
| O8—C6  | 1.474 (3) | C24—C25  | 1.523 (4) |
| C1—H1A | 0.9800    | C24—H24A | 0.9900    |
| C1—H1B | 0.9800    | C24—H24B | 0.9900    |
| C1—H1C | 0.9800    | C25—C26  | 1.523 (3) |
| C2—C17 | 1.382 (3) | C25—H25A | 0.9900    |
| C2—C3  | 1.389 (3) | C25—H25B | 0.9900    |
| C3—C4  | 1.387 (3) | C26—H26A | 0.9900    |
| C3—H3  | 0.9500    | C26—H26B | 0.9900    |
| C4—C5  | 1.395 (3) | C27—H27A | 0.9800    |
| C4—H4  | 0.9500    | C27—H27B | 0.9800    |
| C5—C16 | 1.389 (3) | C27—H27C | 0.9800    |
| C5—C6  | 1.507 (3) | C28—C30  | 1.523 (3) |

|            |             |               |           |
|------------|-------------|---------------|-----------|
| C6—C38     | 1.528 (3)   | C28—C38       | 1.531 (3) |
| C6—C7      | 1.591 (3)   | C30—C31       | 1.385 (3) |
| C7—C18     | 1.511 (3)   | C30—C36       | 1.400 (3) |
| C7—C8      | 1.554 (3)   | C31—C32       | 1.397 (3) |
| C7—H7A     | 1.0000      | C32—C33       | 1.384 (3) |
| C8—C9      | 1.520 (3)   | C32—H32       | 0.9500    |
| C8—C28     | 1.554 (3)   | C33—C35       | 1.399 (3) |
| C8—H8      | 1.0000      | C34—H34A      | 0.9800    |
| C10—N11    | 1.462 (3)   | C34—H34B      | 0.9800    |
| C10—C24    | 1.530 (3)   | C34—H34C      | 0.9800    |
| C10—H10    | 1.0000      | C35—C36       | 1.384 (3) |
| N11—C12    | 1.355 (3)   | C35—H35       | 0.9500    |
| N11—H11    | 0.8800      | C37—H37A      | 0.9800    |
| C12—C13    | 1.501 (4)   | C37—H37B      | 0.9800    |
| C13—C14    | 1.331 (5)   | C37—H37C      | 0.9800    |
| C13—C27    | 1.481 (4)   | C38—H38       | 1.0000    |
| C14—C15    | 1.456 (5)   | O1W—H1WA      | 0.83 (5)  |
| C14—H14    | 0.9500      | O1W—H1WB      | 0.95 (4)  |
| C15—H15A   | 0.9800      |               |           |
|            |             |               |           |
| C2—O1—C1   | 116.31 (19) | C20—C19—H19   | 119.7     |
| C33—O4—C34 | 117.29 (19) | C18—C19—H19   | 119.7     |
| C36—O5—C37 | 119.1 (2)   | C19—C20—C21   | 120.4 (2) |
| C38—O6—H6  | 109.5       | C19—C20—H20   | 119.8     |
| C28—O7—H7  | 109.5       | C21—C20—H20   | 119.8     |
| C9—N1—C10  | 127.31 (19) | C20—C21—C22   | 119.5 (2) |
| C9—N1—C26  | 120.61 (18) | C20—C21—H21   | 120.2     |
| C10—N1—C26 | 112.06 (18) | C22—C21—H21   | 120.2     |
| C31—O8—C6  | 116.09 (17) | C21—C22—C23   | 120.3 (2) |
| O1—C1—H1A  | 109.5       | C21—C22—H22   | 119.9     |
| O1—C1—H1B  | 109.5       | C23—C22—H22   | 119.9     |
| H1A—C1—H1B | 109.5       | C22—C23—C18   | 120.5 (2) |
| O1—C1—H1C  | 109.5       | C22—C23—H23   | 119.8     |
| H1A—C1—H1C | 109.5       | C18—C23—H23   | 119.8     |
| H1B—C1—H1C | 109.5       | C25—C24—C10   | 103.4 (2) |
| O1—C2—C17  | 124.3 (2)   | C25—C24—H24A  | 111.1     |
| O1—C2—C3   | 115.6 (2)   | C10—C24—H24A  | 111.1     |
| C17—C2—C3  | 120.0 (2)   | C25—C24—H24B  | 111.1     |
| C4—C3—C2   | 119.9 (2)   | C10—C24—H24B  | 111.1     |
| C4—C3—H3   | 120.0       | H24A—C24—H24B | 109.0     |
| C2—C3—H3   | 120.0       | C26—C25—C24   | 103.3 (2) |

|             |             |               |             |
|-------------|-------------|---------------|-------------|
| C3—C4—C5    | 121.1 (2)   | C26—C25—H25A  | 111.1       |
| C3—C4—H4    | 119.5       | C24—C25—H25A  | 111.1       |
| C5—C4—H4    | 119.5       | C26—C25—H25B  | 111.1       |
| C16—C5—C4   | 117.9 (2)   | C24—C25—H25B  | 111.1       |
| C16—C5—C6   | 119.8 (2)   | H25A—C25—H25B | 109.1       |
| C4—C5—C6    | 122.2 (2)   | N1—C26—C25    | 103.74 (19) |
| O8—C6—C5    | 104.35 (17) | N1—C26—H26A   | 111.0       |
| O8—C6—C38   | 105.97 (17) | C25—C26—H26A  | 111.0       |
| C5—C6—C38   | 117.29 (19) | N1—C26—H26B   | 111.0       |
| O8—C6—C7    | 107.97 (17) | C25—C26—H26B  | 111.0       |
| C5—C6—C7    | 116.63 (18) | H26A—C26—H26B | 109.0       |
| C38—C6—C7   | 103.93 (17) | C13—C27—H27A  | 109.5       |
| C18—C7—C8   | 111.38 (18) | C13—C27—H27B  | 109.5       |
| C18—C7—C6   | 117.51 (18) | H27A—C27—H27B | 109.5       |
| C8—C7—C6    | 104.78 (17) | C13—C27—H27C  | 109.5       |
| C18—C7—H7A  | 107.6       | H27A—C27—H27C | 109.5       |
| C8—C7—H7A   | 107.6       | H27B—C27—H27C | 109.5       |
| C6—C7—H7A   | 107.6       | O7—C28—C30    | 114.48 (18) |
| C9—C8—C7    | 113.31 (18) | O7—C28—C38    | 106.74 (17) |
| C9—C8—C28   | 116.16 (19) | C30—C28—C38   | 108.41 (18) |
| C7—C8—C28   | 101.90 (17) | O7—C28—C8     | 115.50 (18) |
| C9—C8—H8    | 108.4       | C30—C28—C8    | 110.19 (18) |
| C7—C8—H8    | 108.4       | C38—C28—C8    | 100.27 (17) |
| C28—C8—H8   | 108.4       | C31—C30—C36   | 118.0 (2)   |
| O3—C9—N1    | 121.1 (2)   | C31—C30—C28   | 119.0 (2)   |
| O3—C9—C8    | 121.6 (2)   | C36—C30—C28   | 123.0 (2)   |
| N1—C9—C8    | 117.25 (19) | O8—C31—C30    | 121.8 (2)   |
| N11—C10—N1  | 109.45 (19) | O8—C31—C32    | 116.0 (2)   |
| N11—C10—C24 | 113.8 (2)   | C30—C31—C32   | 122.2 (2)   |
| N1—C10—C24  | 102.30 (19) | C33—C32—C31   | 117.9 (2)   |
| N11—C10—H10 | 110.3       | C33—C32—H32   | 121.1       |
| N1—C10—H10  | 110.3       | C31—C32—H32   | 121.1       |
| C24—C10—H10 | 110.3       | O4—C33—C32    | 124.0 (2)   |
| C12—N11—C10 | 119.4 (2)   | O4—C33—C35    | 114.3 (2)   |
| C12—N11—H11 | 120.3       | C32—C33—C35   | 121.7 (2)   |
| C10—N11—H11 | 120.3       | O4—C34—H34A   | 109.5       |
| O2—C12—N11  | 120.5 (3)   | O4—C34—H34B   | 109.5       |
| O2—C12—C13  | 121.9 (3)   | H34A—C34—H34B | 109.5       |
| N11—C12—C13 | 117.5 (2)   | O4—C34—H34C   | 109.5       |
| C14—C13—C27 | 125.0 (3)   | H34A—C34—H34C | 109.5       |
| C14—C13—C12 | 120.0 (3)   | H34B—C34—H34C | 109.5       |

|               |           |                   |             |
|---------------|-----------|-------------------|-------------|
| C27—C13—C12   | 115.0 (3) | C36—C35—C33       | 118.5 (2)   |
| C13—C14—C15   | 124.8 (3) | C36—C35—H35       | 120.7       |
| C13—C14—H14   | 117.6     | C33—C35—H35       | 120.7       |
| C15—C14—H14   | 117.6     | O5—C36—C35        | 123.9 (2)   |
| C14—C15—H15A  | 109.5     | O5—C36—C30        | 114.7 (2)   |
| C14—C15—H15B  | 109.5     | C35—C36—C30       | 121.4 (2)   |
| H15A—C15—H15B | 109.5     | O5—C37—H37A       | 109.5       |
| C14—C15—H15C  | 109.5     | O5—C37—H37B       | 109.5       |
| H15A—C15—H15C | 109.5     | H37A—C37—H37B     | 109.5       |
| H15B—C15—H15C | 109.5     | O5—C37—H37C       | 109.5       |
| C5—C16—C17    | 121.6 (2) | H37A—C37—H37C     | 109.5       |
| C5—C16—H16    | 119.2     | H37B—C37—H37C     | 109.5       |
| C17—C16—H16   | 119.2     | O6—C38—C6         | 109.88 (18) |
| C2—C17—C16    | 119.4 (2) | O6—C38—C28        | 111.04 (18) |
| C2—C17—H17    | 120.3     | C6—C38—C28        | 100.79 (17) |
| C16—C17—H17   | 120.3     | O6—C38—H38        | 111.6       |
| C19—C18—C23   | 118.6 (2) | C6—C38—H38        | 111.6       |
| C19—C18—C7    | 122.3 (2) | C28—C38—H38       | 111.6       |
| C23—C18—C7    | 119.0 (2) | H1WA—O1W—<br>H1WB | 109 (4)     |
| C20—C19—C18   | 120.7 (2) |                   |             |

## E. B3LYP/6-31G\*\* Calculation For Equilibrium Geometry of Intermediate 21 and Acyliminium

### Intermediate 22

The calculations were performed using the program *Spartan '10* by Wavefunction, Inc. First a MMFF equilibrium conformer calculation was performed, and the resulting structure was subjected to an equilibrium geometry optimization using B3LYP/6-31G\* level of theory to give the coordinates of cyclic intermediate **21** (Table SI-7). Similarly, a MMFF equilibrium conformer calculation was performed on acyliminium intermediate **22** and the resulting structure was subjected to an equilibrium geometry optimization using B3LYP/6-31G\*\* level of theory to give the coordinates listed in Table SI-8.

**Table SI-7.** Coordinates of B3LYP/6-31G\* Equilibrium Geometry for Cyclic Intermediate **21**

| Atom  | X (Å)  | Y (Å)  | Z (Å)  |
|-------|--------|--------|--------|
| C(1)  | 3.091  | 1.369  | 0.134  |
| C(2)  | 1.095  | 3.155  | -0.701 |
| C(3)  | 1.735  | 0.984  | 0.294  |
| C(4)  | 3.432  | 2.609  | -0.406 |
| C(5)  | 2.435  | 3.501  | -0.821 |
| C(6)  | 0.774  | 1.911  | -0.145 |
| H(7)  | 4.461  | 2.916  | -0.533 |
| H(8)  | 0.284  | 3.801  | -1.008 |
| O(9)  | 4.056  | 0.484  | 0.528  |
| O(10) | 2.887  | 4.68   | -1.334 |
| O(11) | -0.571 | 1.682  | -0.047 |
| C(12) | 1.194  | -0.303 | 0.931  |
| C(13) | -1.024 | 0.372  | 0.413  |
| C(14) | -0.595 | -0.682 | -0.715 |
| H(15) | -0.309 | -0.096 | -1.592 |
| C(16) | 0.659  | -1.329 | -0.105 |
| H(17) | 0.319  | -2.189 | 0.483  |
| C(18) | 5.413  | 0.899  | 0.477  |
| H(19) | 5.584  | 1.792  | 1.091  |
| H(20) | 5.738  | 1.1    | -0.552 |
| H(21) | 5.994  | 0.068  | 0.881  |
| C(22) | 1.926  | 5.628  | -1.772 |
| H(23) | 1.315  | 5.231  | -2.593 |
| H(24) | 2.496  | 6.488  | -2.128 |
| H(25) | 1.267  | 5.941  | -0.952 |
| C(26) | -0.132 | 0.059  | 1.643  |
| H(27) | -0.039 | 0.946  | 2.282  |
| O(28) | -0.596 | -1.052 | 2.392  |
| H(29) | 0.195  | -1.381 | 2.858  |
| O(30) | 2.106  | -0.937 | 1.828  |
| C(31) | -2.509 | 0.562  | 0.643  |



|       |        |        |        |
|-------|--------|--------|--------|
| C(32) | -5.268 | 1.051  | 0.967  |
| C(33) | -3.13  | 0.38   | 1.887  |
| C(34) | -3.297 | 1.001  | -0.427 |
| C(35) | -4.661 | 1.246  | -0.28  |
| C(36) | -4.491 | 0.616  | 2.048  |
| H(37) | -2.552 | 0.034  | 2.735  |
| H(38) | -2.839 | 1.166  | -1.397 |
| H(39) | -5.234 | 1.585  | -1.136 |
| H(40) | -4.974 | 0.472  | 3.01   |
| C(41) | -1.611 | -1.716 | -1.162 |
| C(42) | -3.407 | -3.687 | -2.065 |
| C(43) | -2.269 | -2.555 | -0.251 |
| C(44) | -1.863 | -1.885 | -2.529 |
| C(45) | -2.754 | -2.862 | -2.979 |
| C(46) | -3.16  | -3.53  | -0.699 |
| H(47) | -2.089 | -2.437 | 0.814  |
| H(48) | -1.34  | -1.259 | -3.248 |
| H(49) | -2.93  | -2.979 | -4.046 |
| H(50) | -3.666 | -4.167 | 0.023  |
| H(51) | -4.102 | -4.448 | -2.412 |
| O(52) | -6.593 | 1.256  | 1.228  |
| C(53) | -7.423 | 1.698  | 0.166  |
| H(54) | -7.095 | 2.669  | -0.227 |
| H(55) | -8.424 | 1.801  | 0.592  |
| H(56) | -7.453 | 0.969  | -0.655 |
| C(57) | 1.819  | -1.799 | -0.952 |
| O(58) | 1.923  | -1.761 | -2.17  |
| N(59) | 2.809  | -2.238 | -0.105 |
| C(60) | 2.653  | -2.183 | 1.344  |
| H(61) | 1.968  | -2.979 | 1.673  |
| C(62) | 4.069  | -2.409 | 1.883  |
| H(63) | 4.067  | -2.952 | 2.833  |
| H(64) | 4.517  | -1.427 | 2.049  |
| C(65) | 4.783  | -3.172 | 0.749  |
| H(66) | 5.869  | -3.049 | 0.777  |
| H(67) | 4.571  | -4.245 | 0.822  |
| C(68) | 4.158  | -2.601 | -0.537 |
| H(69) | 4.11   | -3.322 | -1.358 |
| H(70) | 4.692  | -1.714 | -0.898 |

**Table SI-8.** Coordinates of B3LYP/6-31G\*\* Equilibrium Geometry of Acyliminium Intermediate **22**

| Atom | X (Å) | Y (Å) | Z (Å)  |
|------|-------|-------|--------|
| C(1) | 3.091 | 1.369 | 0.134  |
| C(2) | 1.095 | 3.155 | -0.701 |

|       |        |        |        |
|-------|--------|--------|--------|
| C(3)  | 1.735  | 0.984  | 0.294  |
| C(4)  | 3.432  | 2.609  | -0.406 |
| C(5)  | 2.435  | 3.501  | -0.821 |
| C(6)  | 0.774  | 1.911  | -0.145 |
| H(7)  | 4.461  | 2.916  | -0.533 |
| H(8)  | 0.284  | 3.801  | -1.008 |
| O(9)  | 4.056  | 0.484  | 0.528  |
| O(10) | 2.887  | 4.68   | -1.334 |
| O(11) | -0.571 | 1.682  | -0.047 |
| C(12) | 1.194  | -0.303 | 0.931  |
| C(13) | -1.024 | 0.372  | 0.413  |
| C(14) | -0.595 | -0.682 | -0.715 |
| H(15) | -0.309 | -0.096 | -1.592 |
| C(16) | 0.659  | -1.329 | -0.105 |
| H(17) | 0.319  | -2.189 | 0.483  |
| C(18) | 5.413  | 0.899  | 0.477  |
| H(19) | 5.584  | 1.792  | 1.091  |
| H(20) | 5.738  | 1.1    | -0.552 |
| H(21) | 5.994  | 0.068  | 0.881  |
| C(22) | 1.926  | 5.628  | -1.772 |
| H(23) | 1.315  | 5.231  | -2.593 |
| H(24) | 2.496  | 6.488  | -2.128 |
| H(25) | 1.267  | 5.941  | -0.952 |
| C(26) | -0.132 | 0.059  | 1.643  |
| H(27) | -0.039 | 0.946  | 2.282  |
| O(28) | -0.596 | -1.052 | 2.392  |
| H(29) | 0.195  | -1.381 | 2.858  |
| O(30) | 2.106  | -0.937 | 1.828  |
| C(31) | -2.509 | 0.562  | 0.643  |
| C(32) | -5.268 | 1.051  | 0.967  |
| C(33) | -3.13  | 0.38   | 1.887  |
| C(34) | -3.297 | 1.001  | -0.427 |
| C(35) | -4.661 | 1.246  | -0.28  |
| C(36) | -4.491 | 0.616  | 2.048  |
| H(37) | -2.552 | 0.034  | 2.735  |
| H(38) | -2.839 | 1.166  | -1.397 |
| H(39) | -5.234 | 1.585  | -1.136 |
| H(40) | -4.974 | 0.472  | 3.01   |
| C(41) | -1.611 | -1.716 | -1.162 |
| C(42) | -3.407 | -3.687 | -2.065 |
| C(43) | -2.269 | -2.555 | -0.251 |
| C(44) | -1.863 | -1.885 | -2.529 |
| C(45) | -2.754 | -2.862 | -2.979 |
| C(46) | -3.16  | -3.53  | -0.699 |
| H(47) | -2.089 | -2.437 | 0.814  |

|       |        |        |        |
|-------|--------|--------|--------|
| H(48) | -1.34  | -1.259 | -3.248 |
| H(49) | -2.93  | -2.979 | -4.046 |
| H(50) | -3.666 | -4.167 | 0.023  |
| H(51) | -4.102 | -4.448 | -2.412 |
| O(52) | -6.593 | 1.256  | 1.228  |
| C(53) | -7.423 | 1.698  | 0.166  |
| H(54) | -7.095 | 2.669  | -0.227 |
| H(55) | -8.424 | 1.801  | 0.592  |
| H(56) | -7.453 | 0.969  | -0.655 |
| C(57) | 1.819  | -1.799 | -0.952 |
| O(58) | 1.923  | -1.761 | -2.17  |
| N(59) | 2.809  | -2.238 | -0.105 |
| C(60) | 2.653  | -2.183 | 1.344  |
| H(61) | 1.968  | -2.979 | 1.673  |
| C(62) | 4.069  | -2.409 | 1.883  |
| H(63) | 4.067  | -2.952 | 2.833  |
| H(64) | 4.517  | -1.427 | 2.049  |
| C(65) | 4.783  | -3.172 | 0.749  |
| H(66) | 5.869  | -3.049 | 0.777  |
| H(67) | 4.571  | -4.245 | 0.822  |
| C(68) | 4.158  | -2.601 | -0.537 |
| H(69) | 4.11   | -3.322 | -1.358 |
| H(70) | 4.692  | -1.714 | -0.898 |

## E. Select Spectra

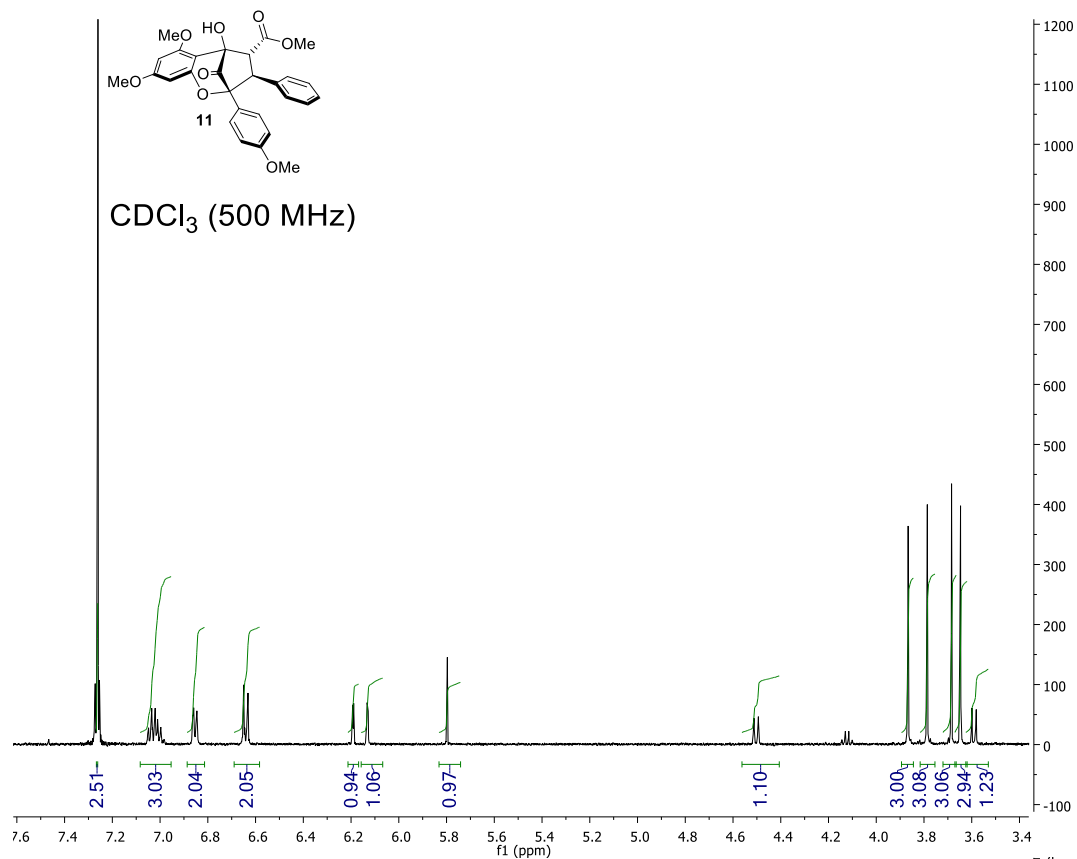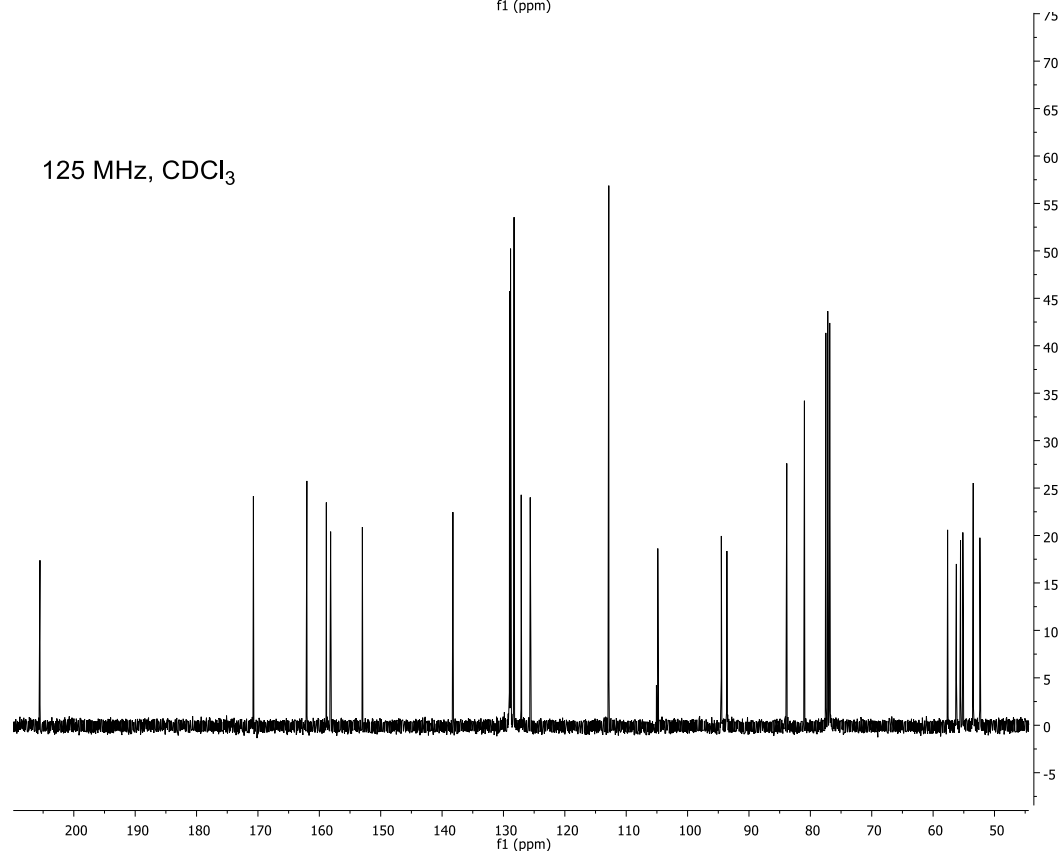

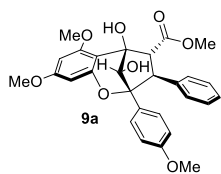

CDCl<sub>3</sub> (500 MHz)

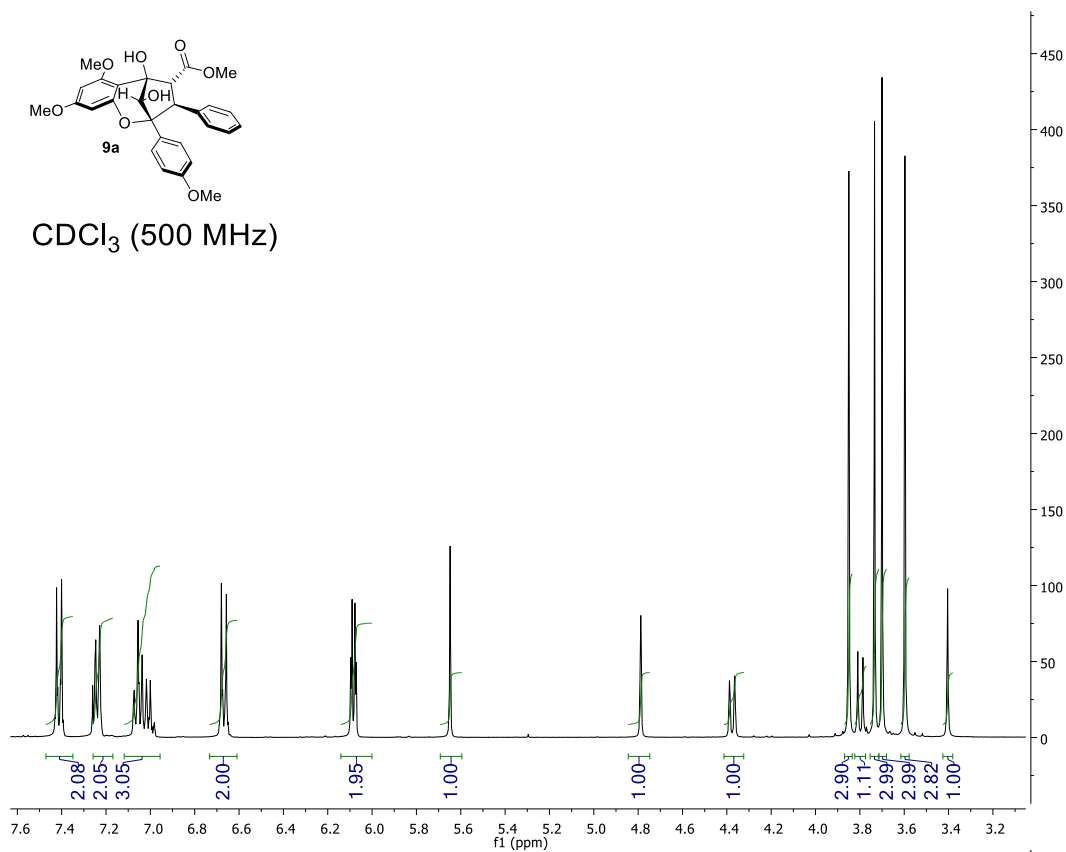

125 MHz, CDCl<sub>3</sub>

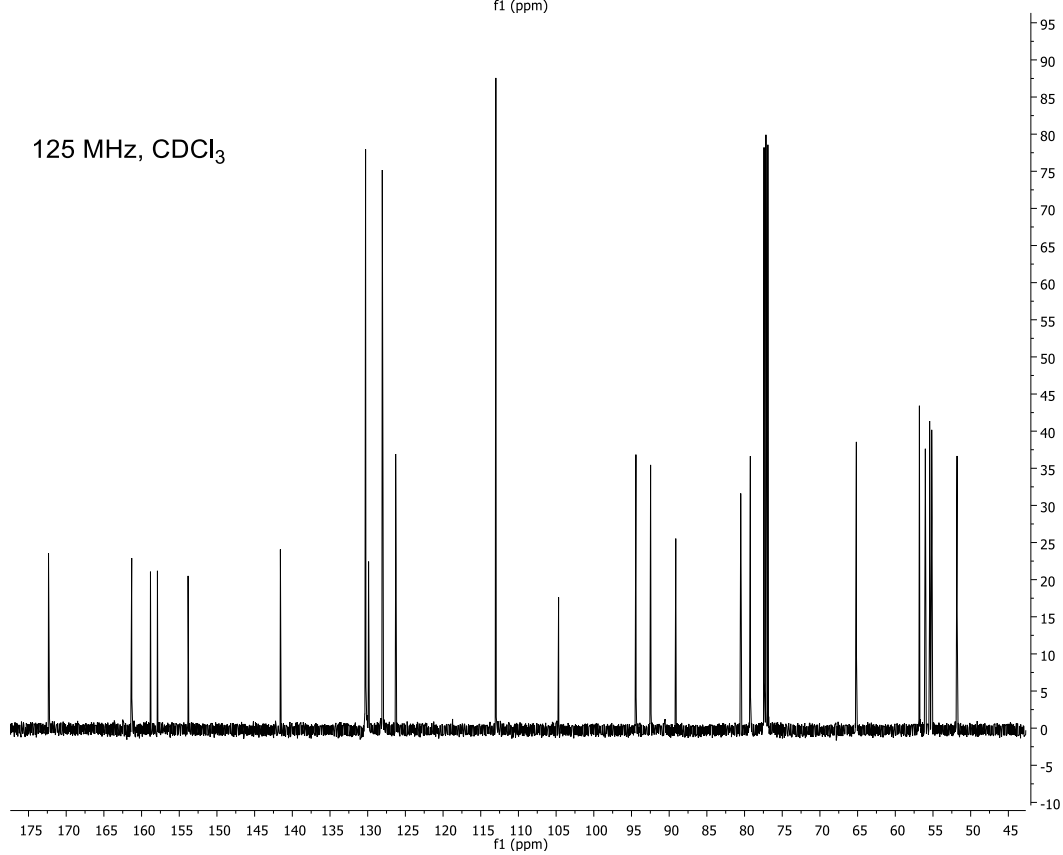

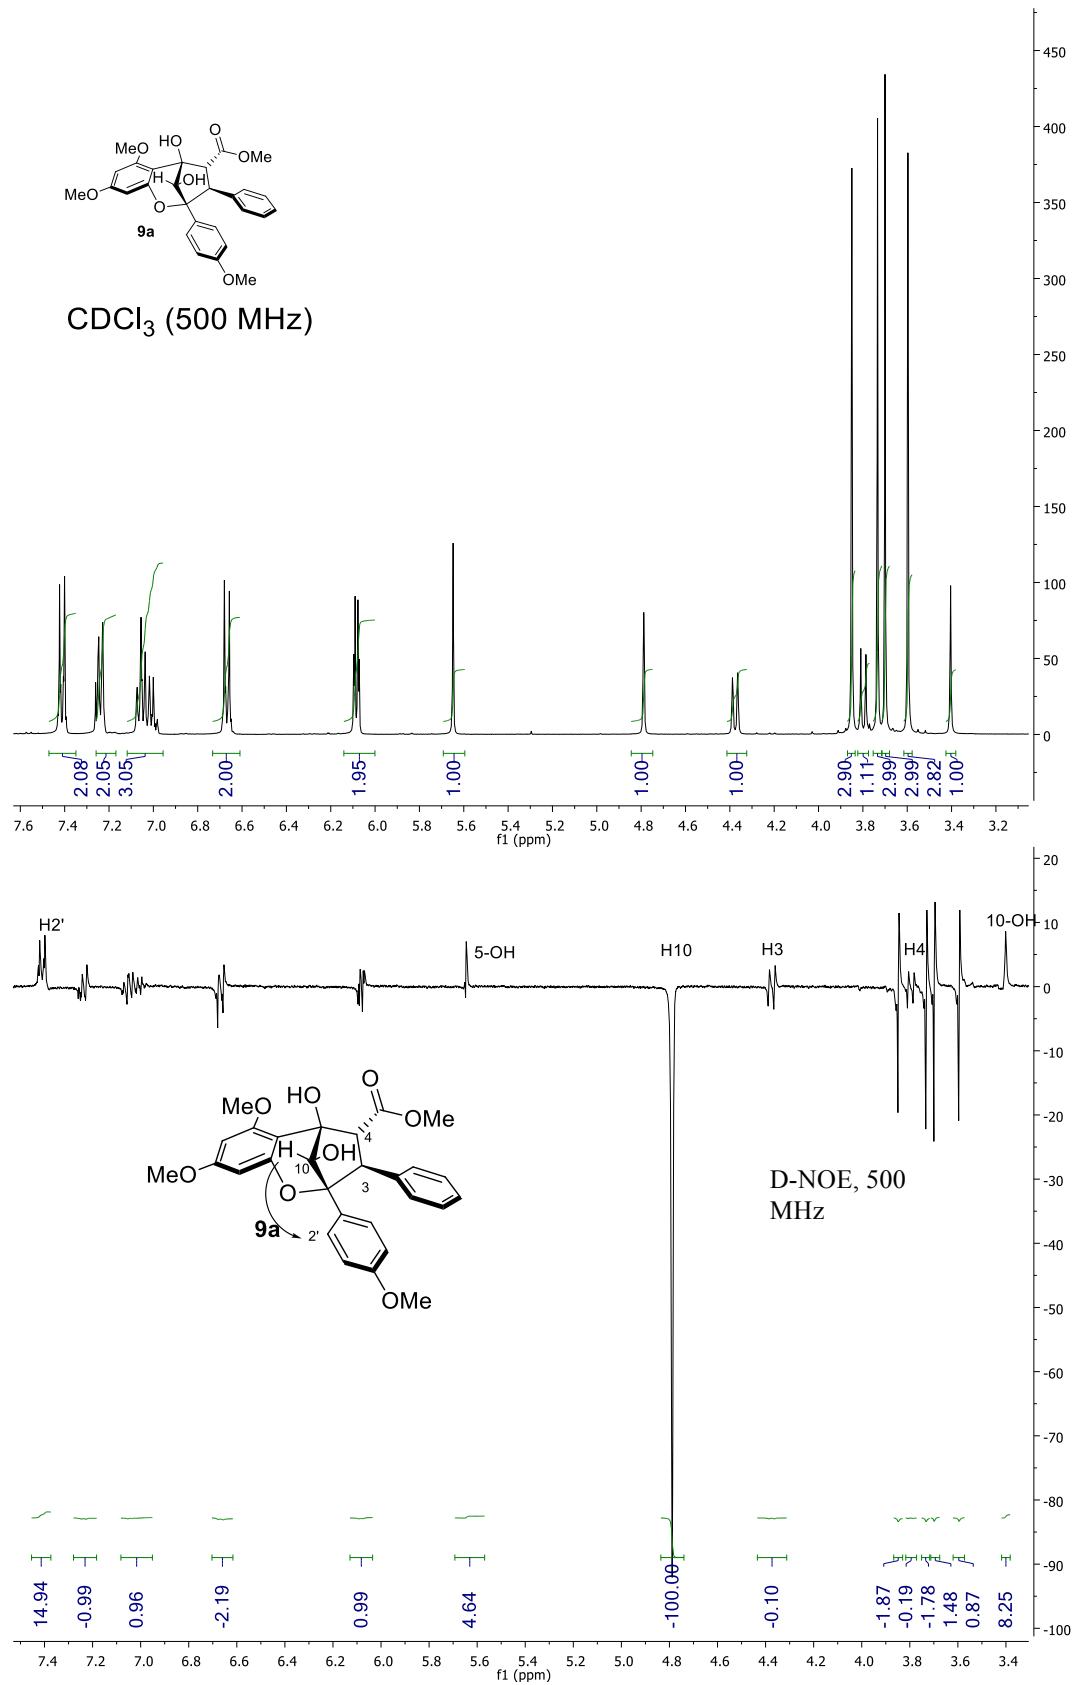

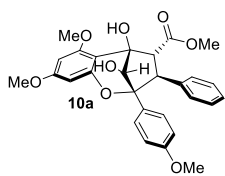

CDCl<sub>3</sub> (500 MHz)

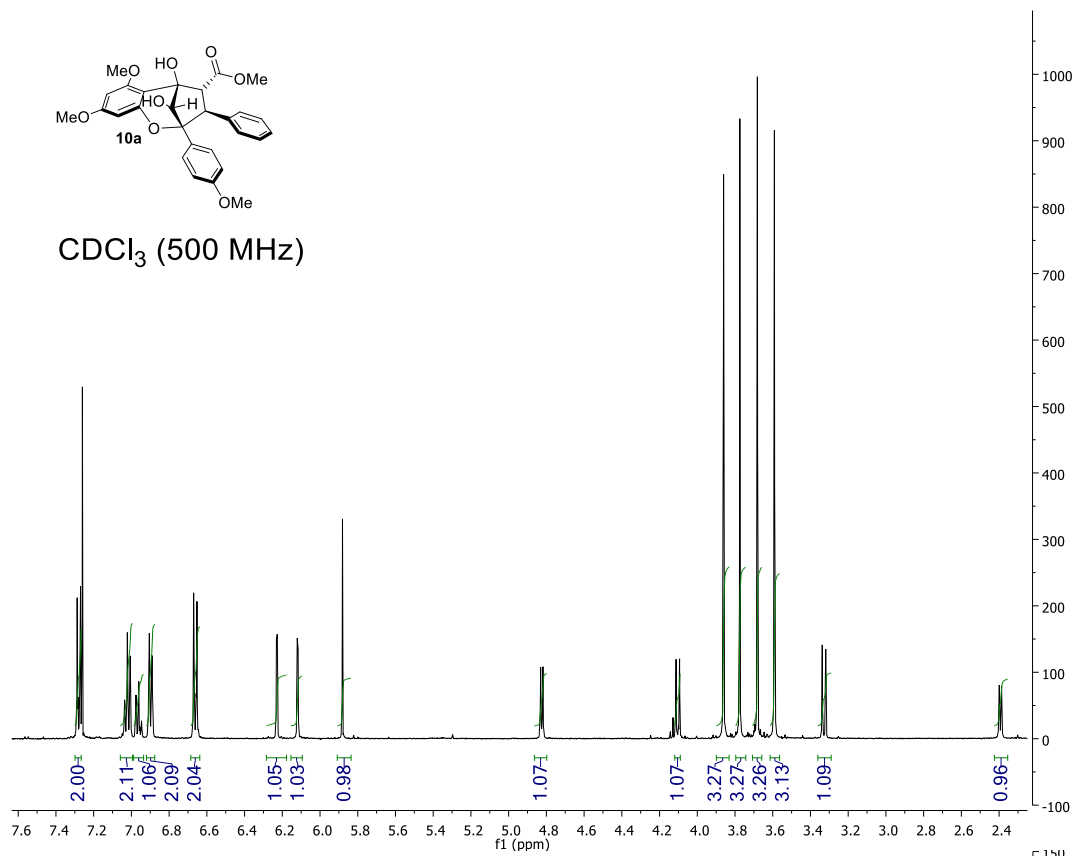

125 MHz, CDCl<sub>3</sub>

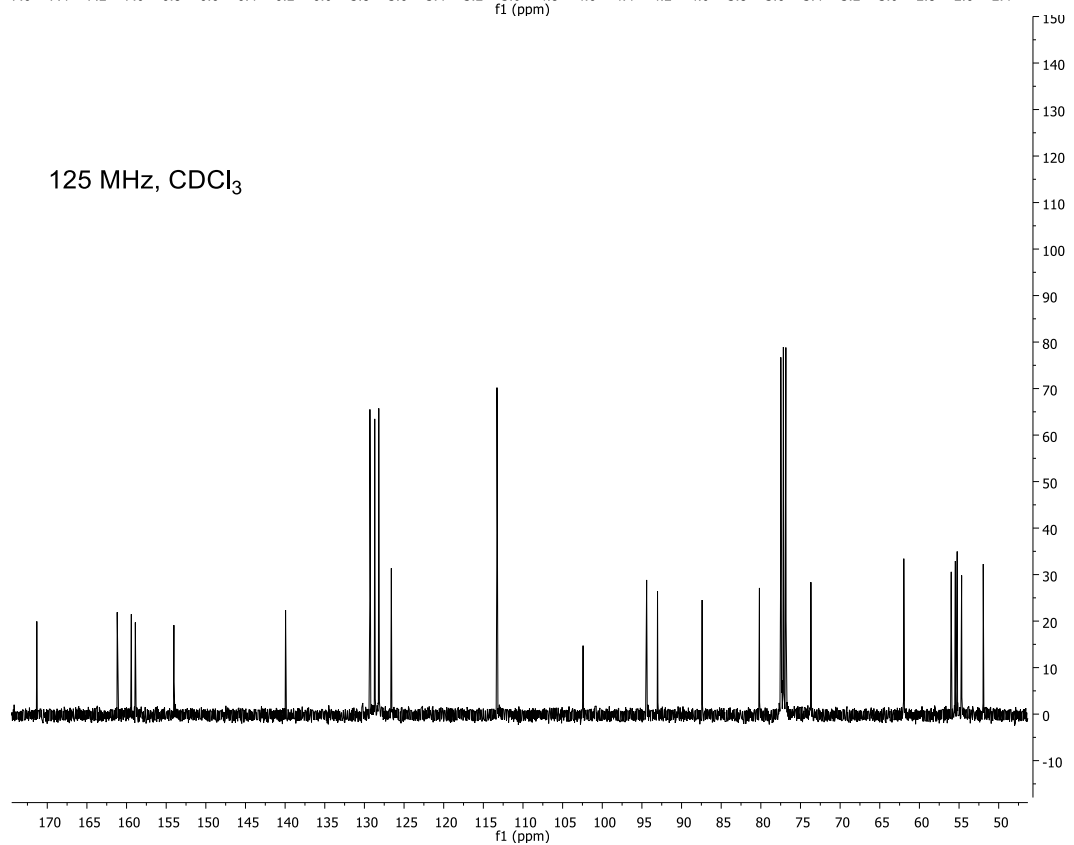

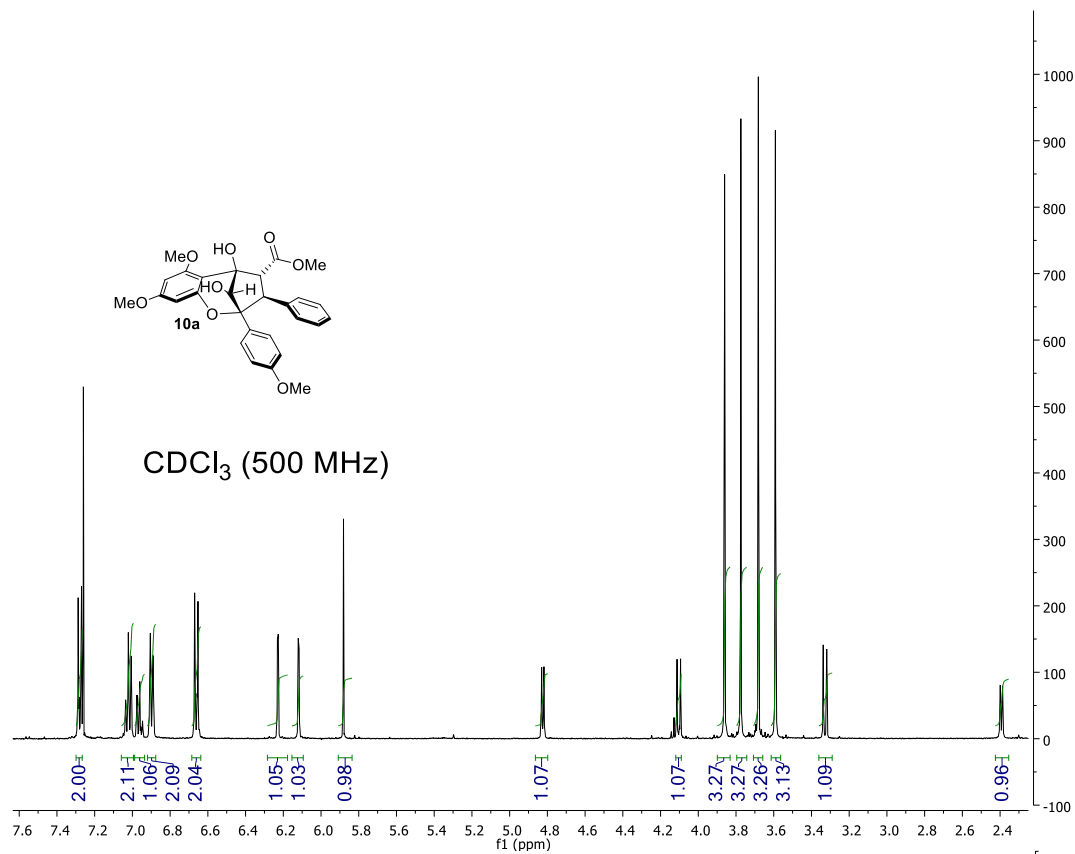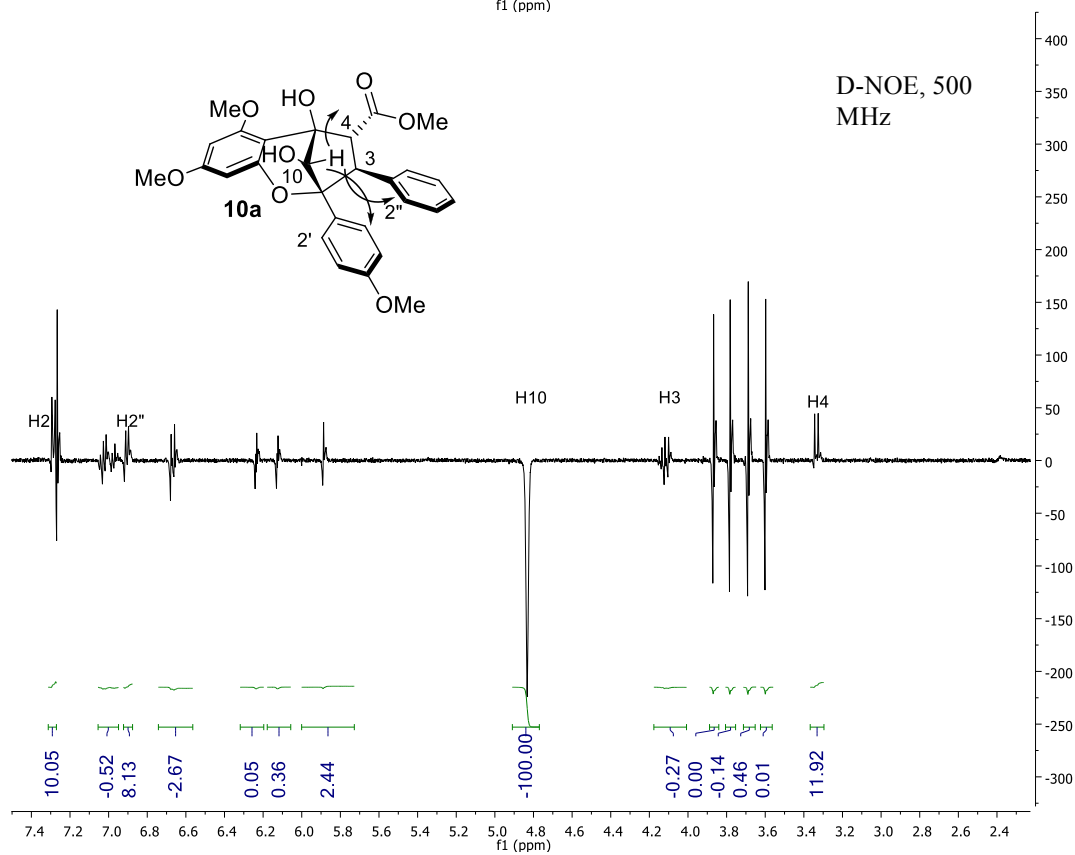



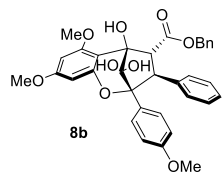

CDCl<sub>3</sub> (500 MHz)

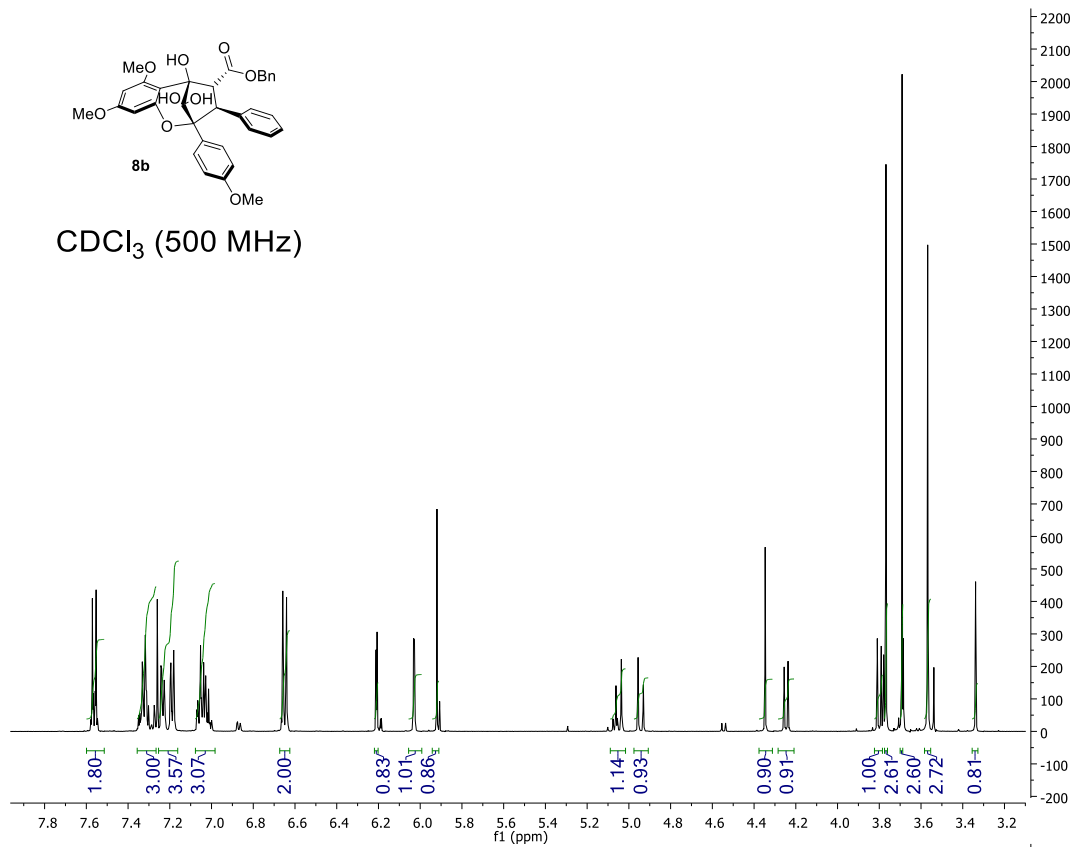

125 MHz, CDCl<sub>3</sub>

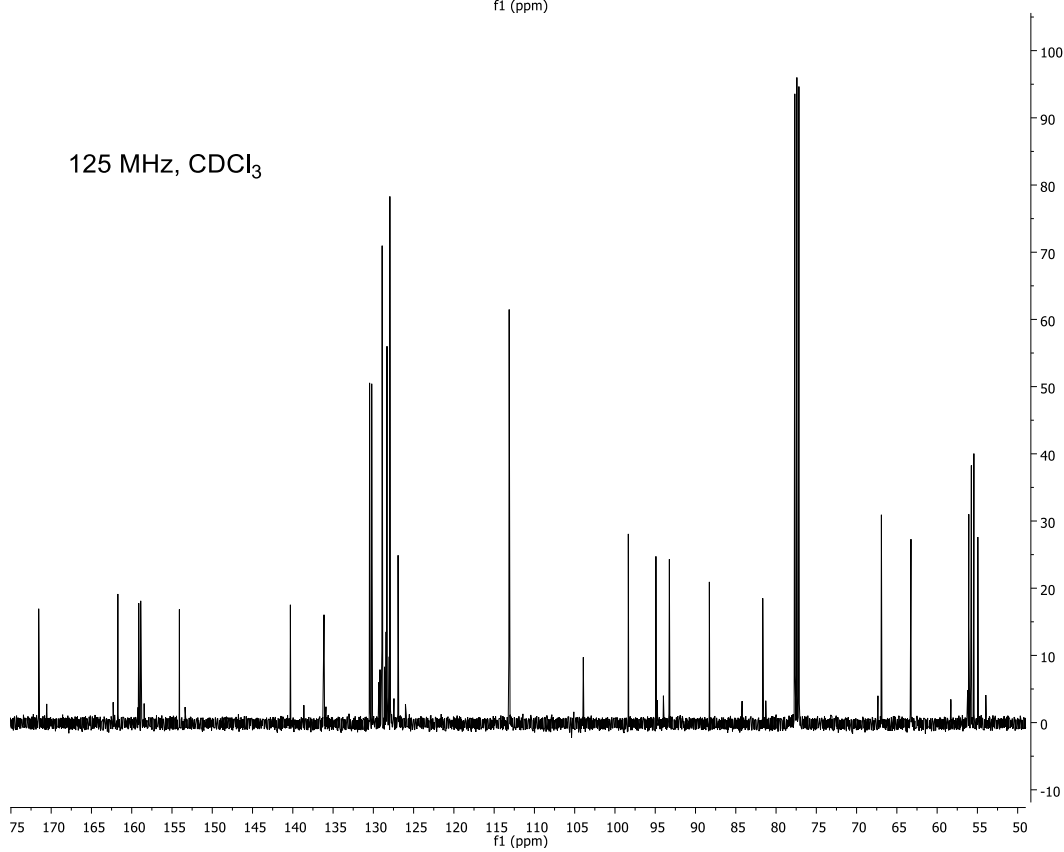

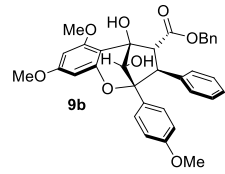

CDCl<sub>3</sub> (500 MHz)

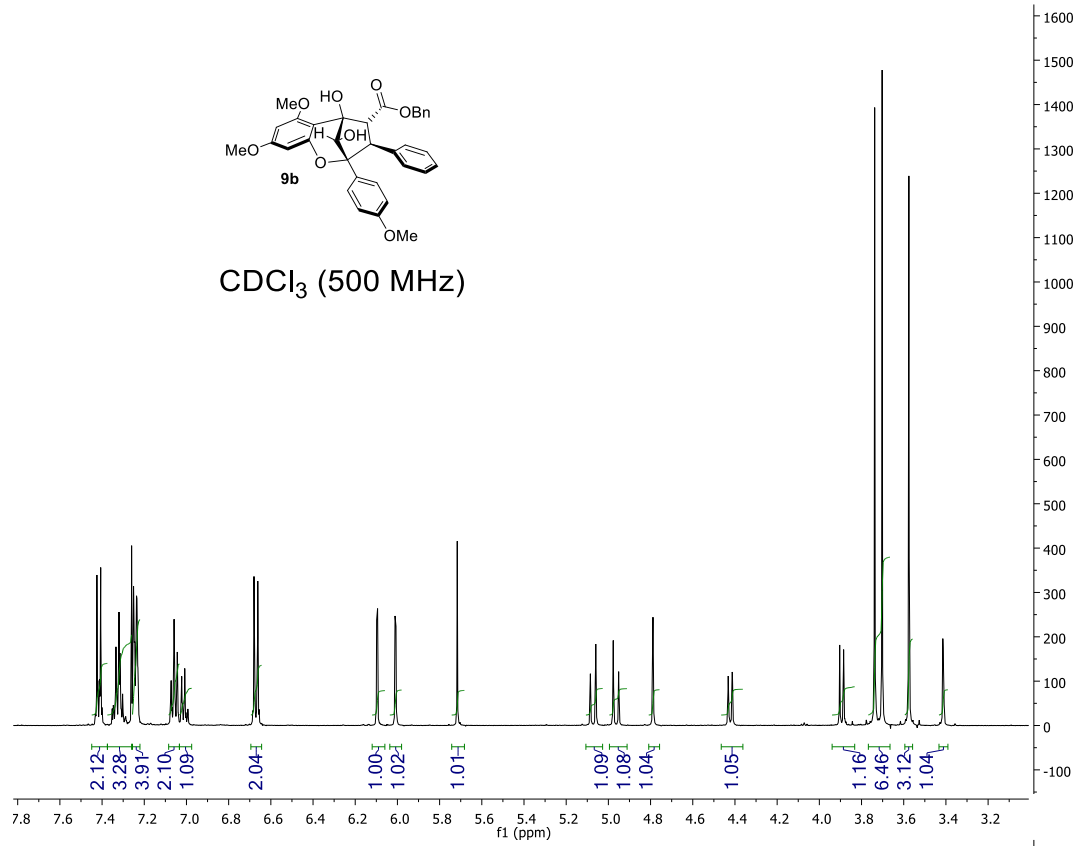

125 MHz, CDCl<sub>3</sub>

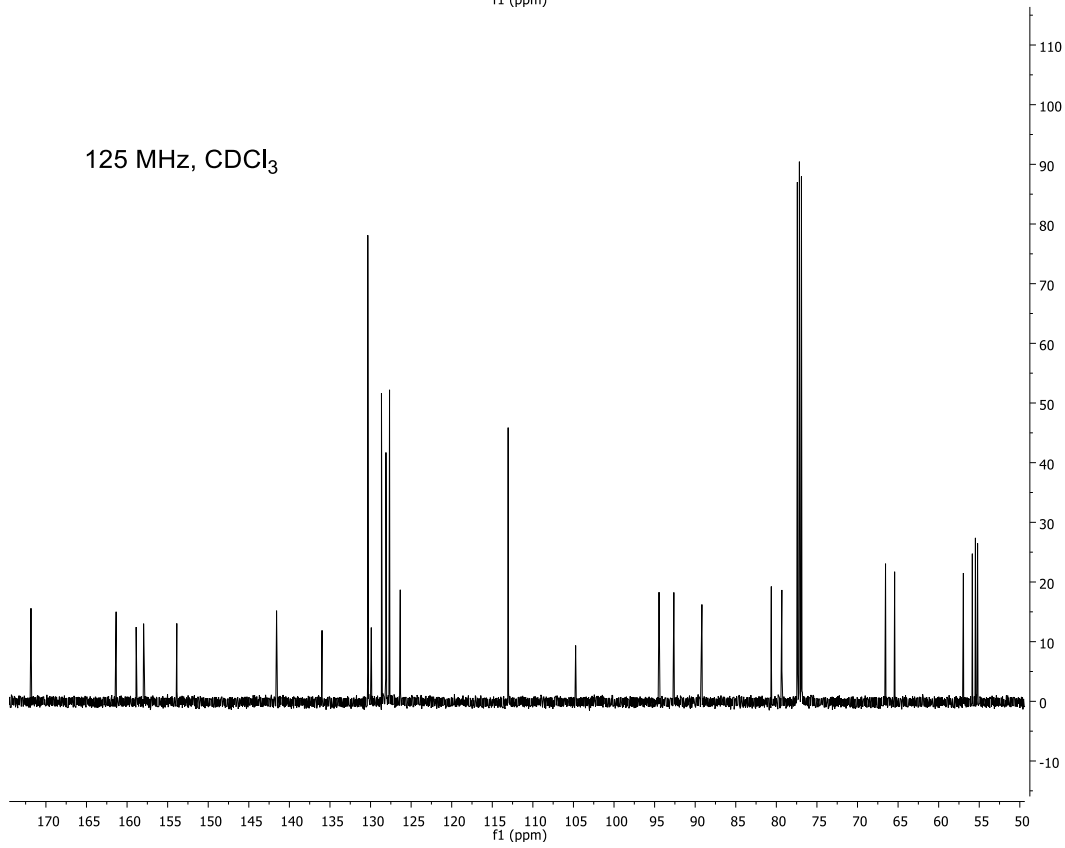

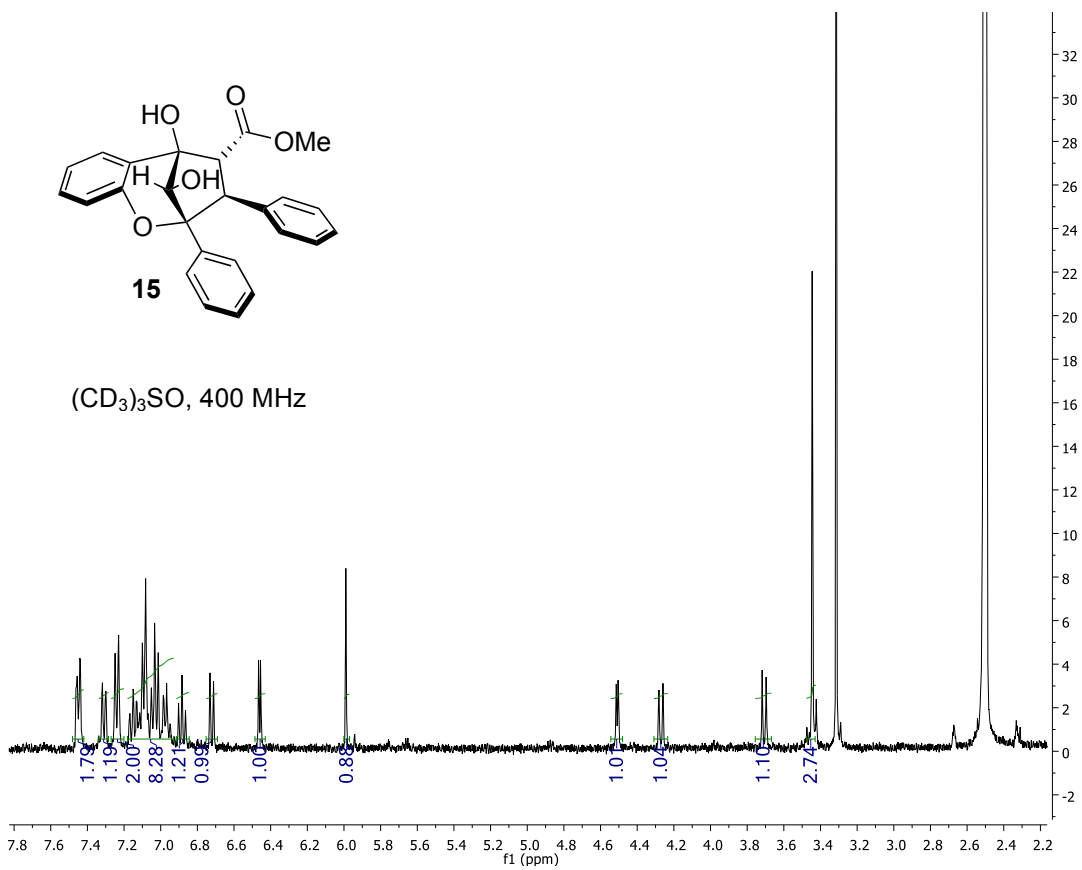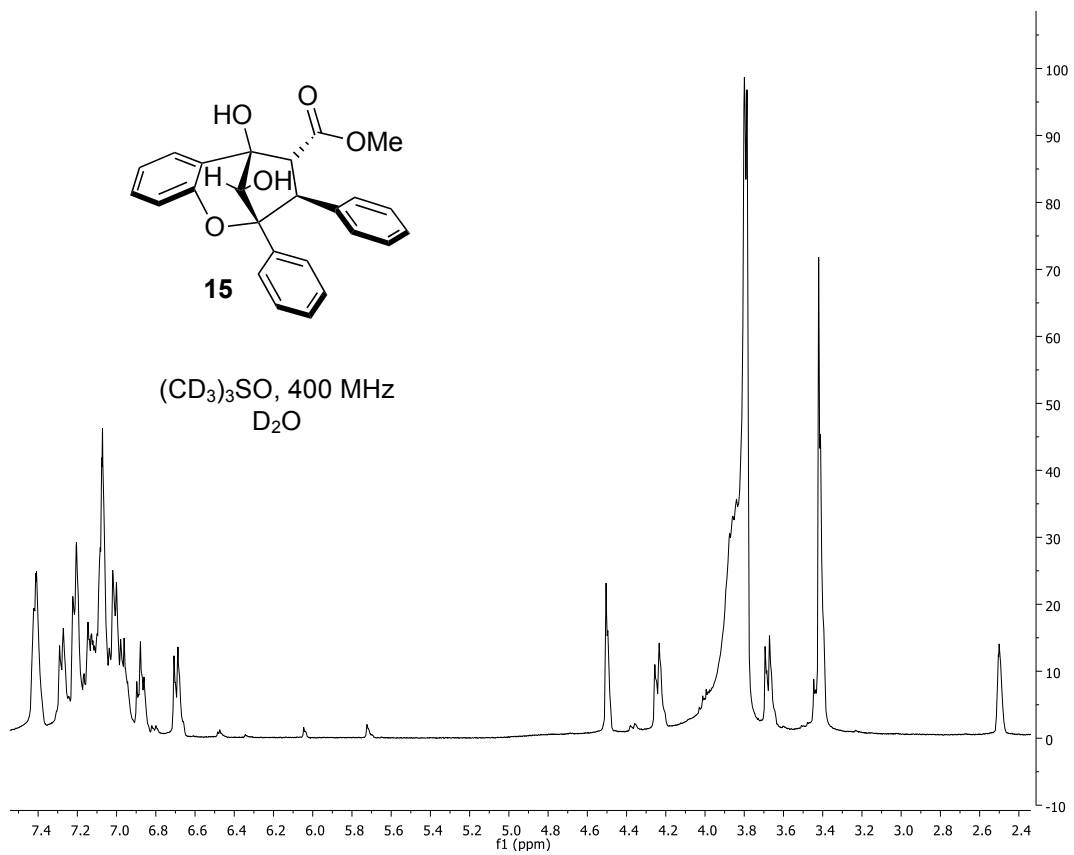

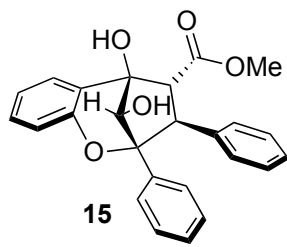

(CD<sub>3</sub>)<sub>2</sub>SO, 125 MHz

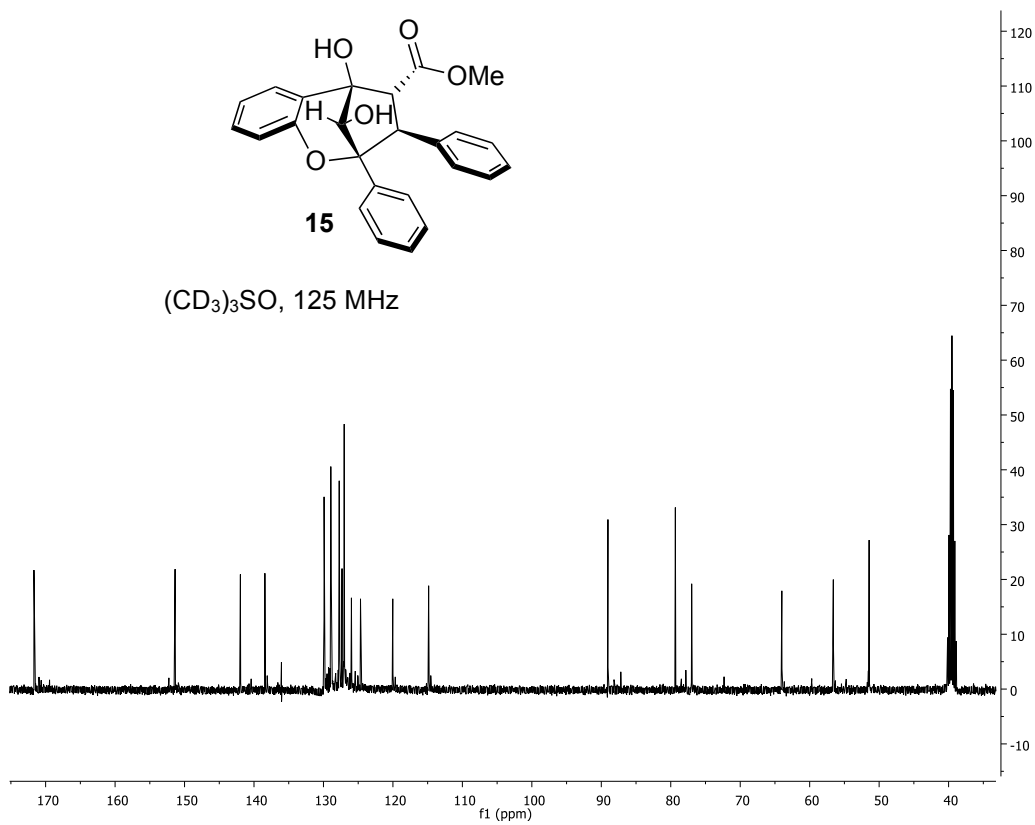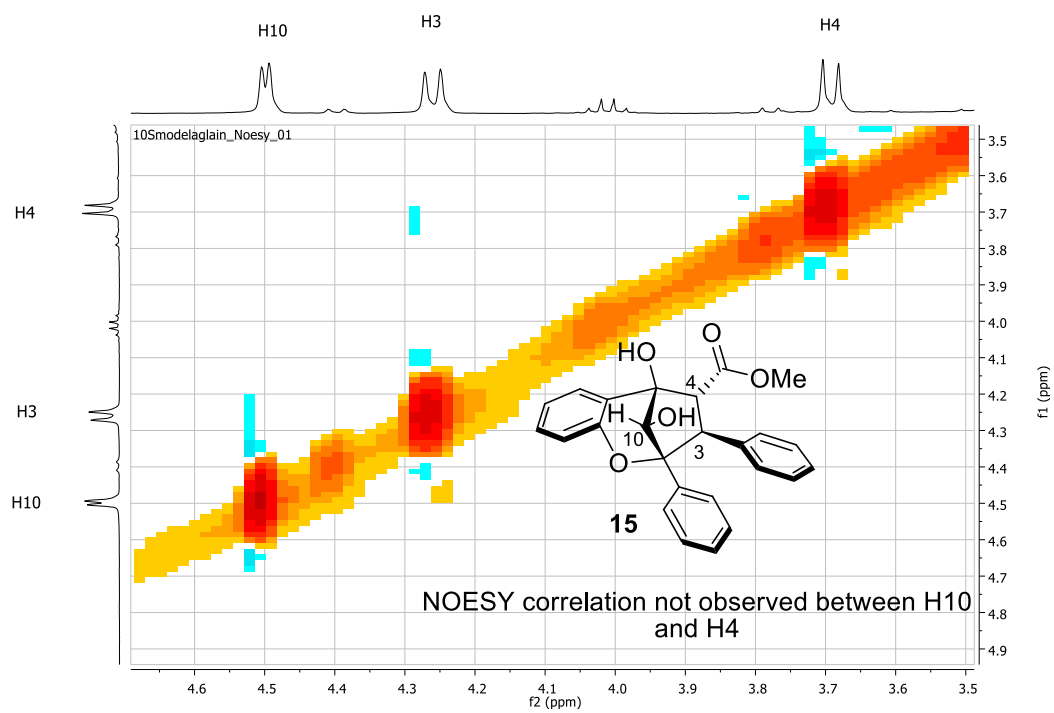

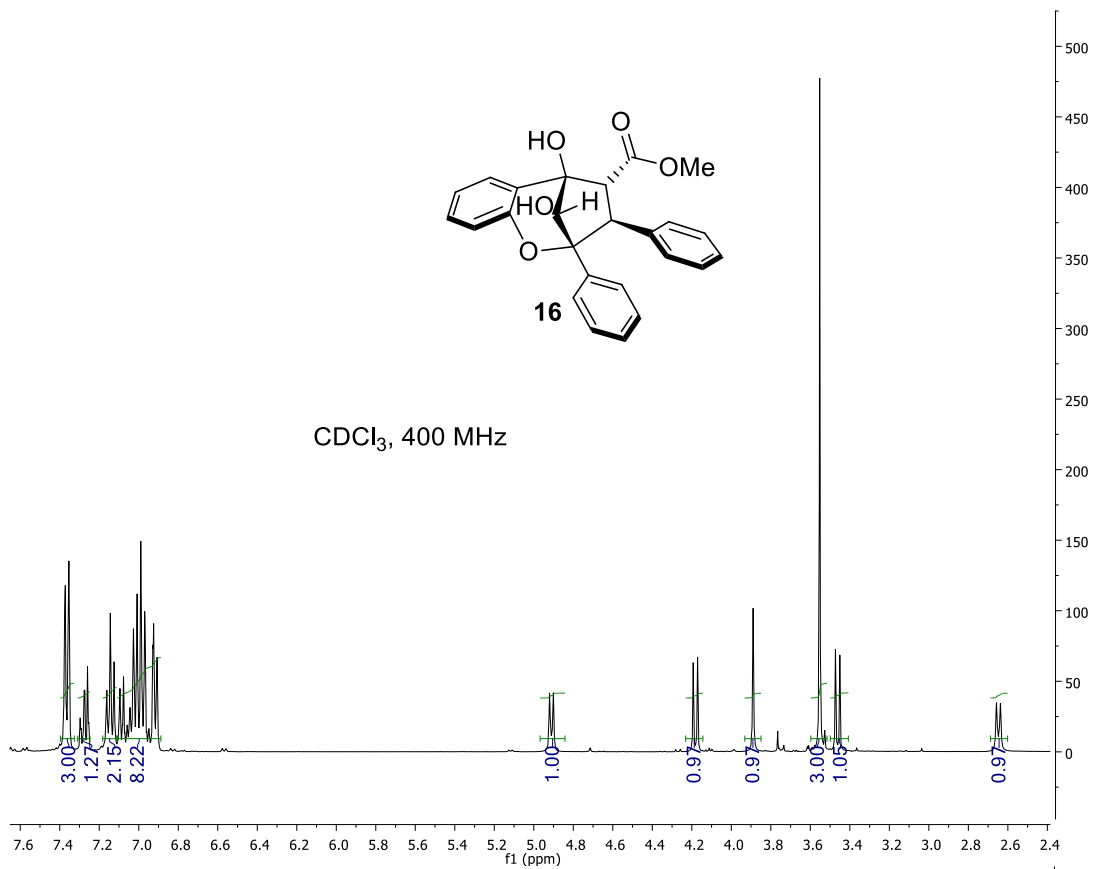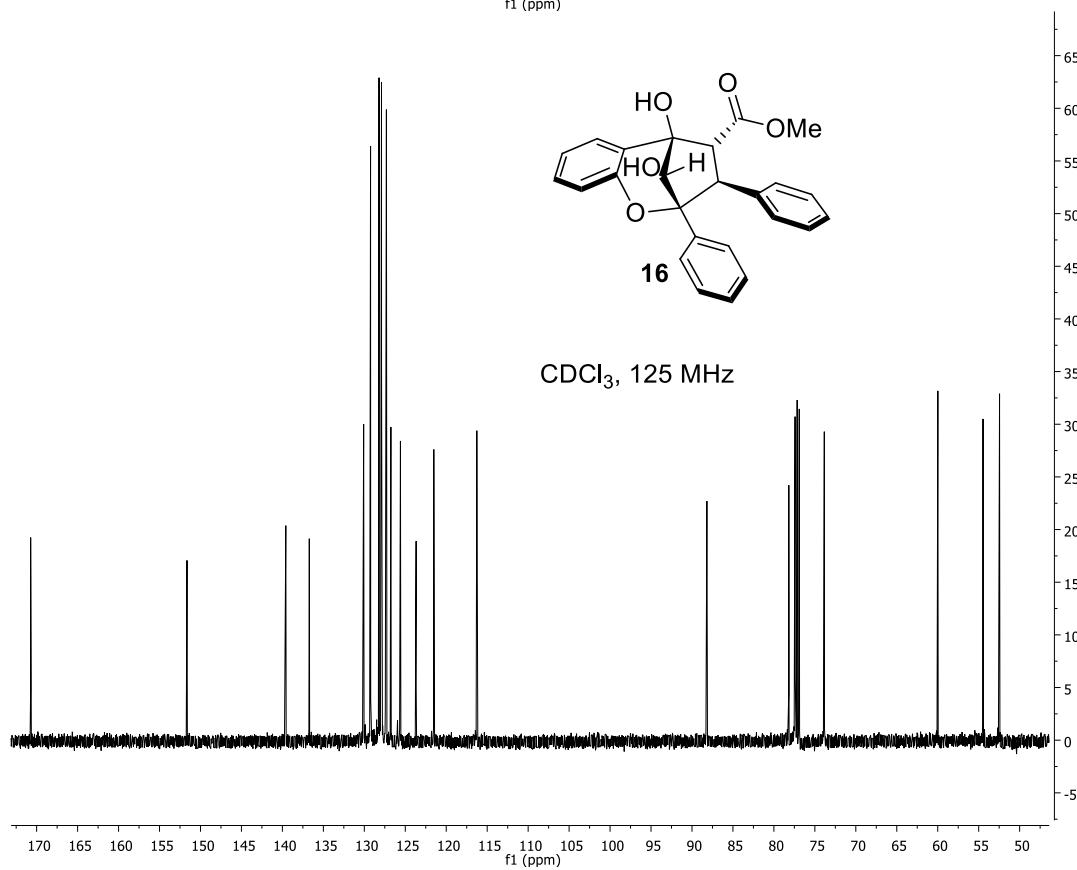

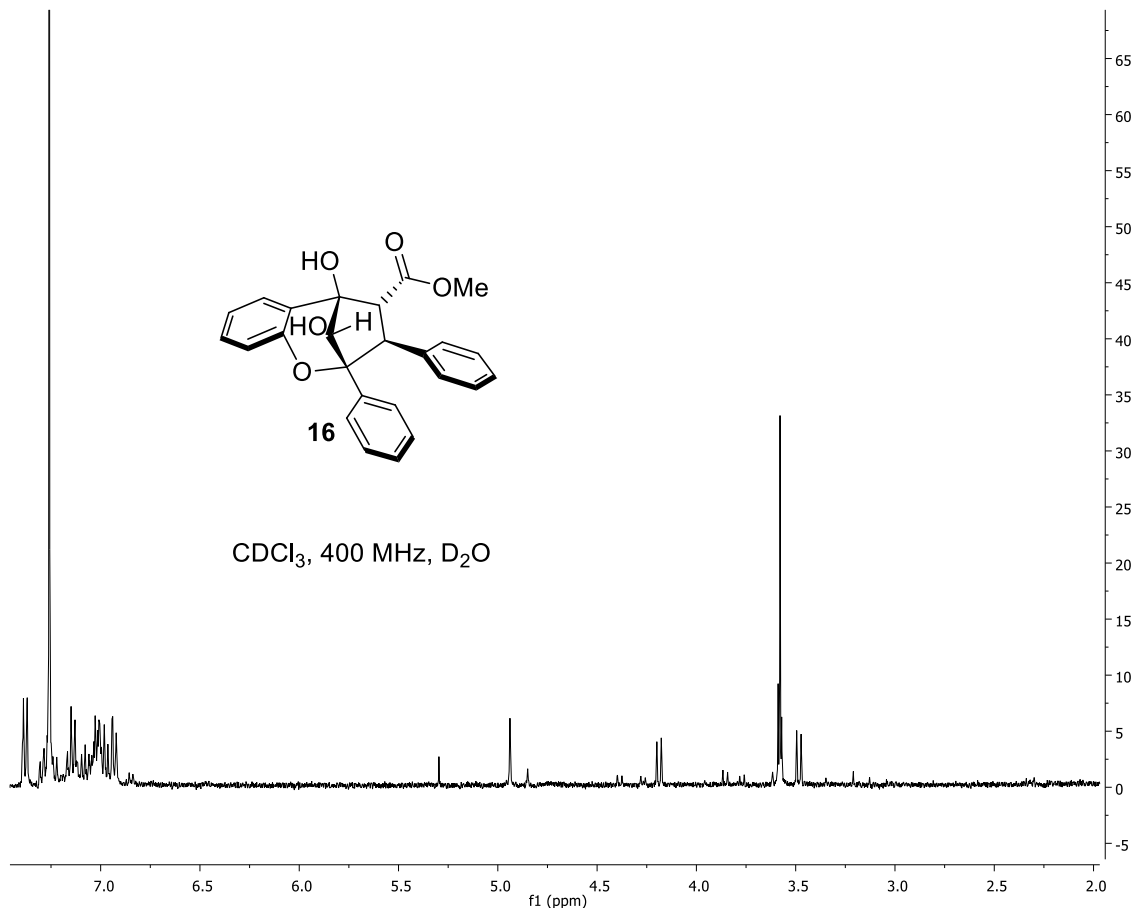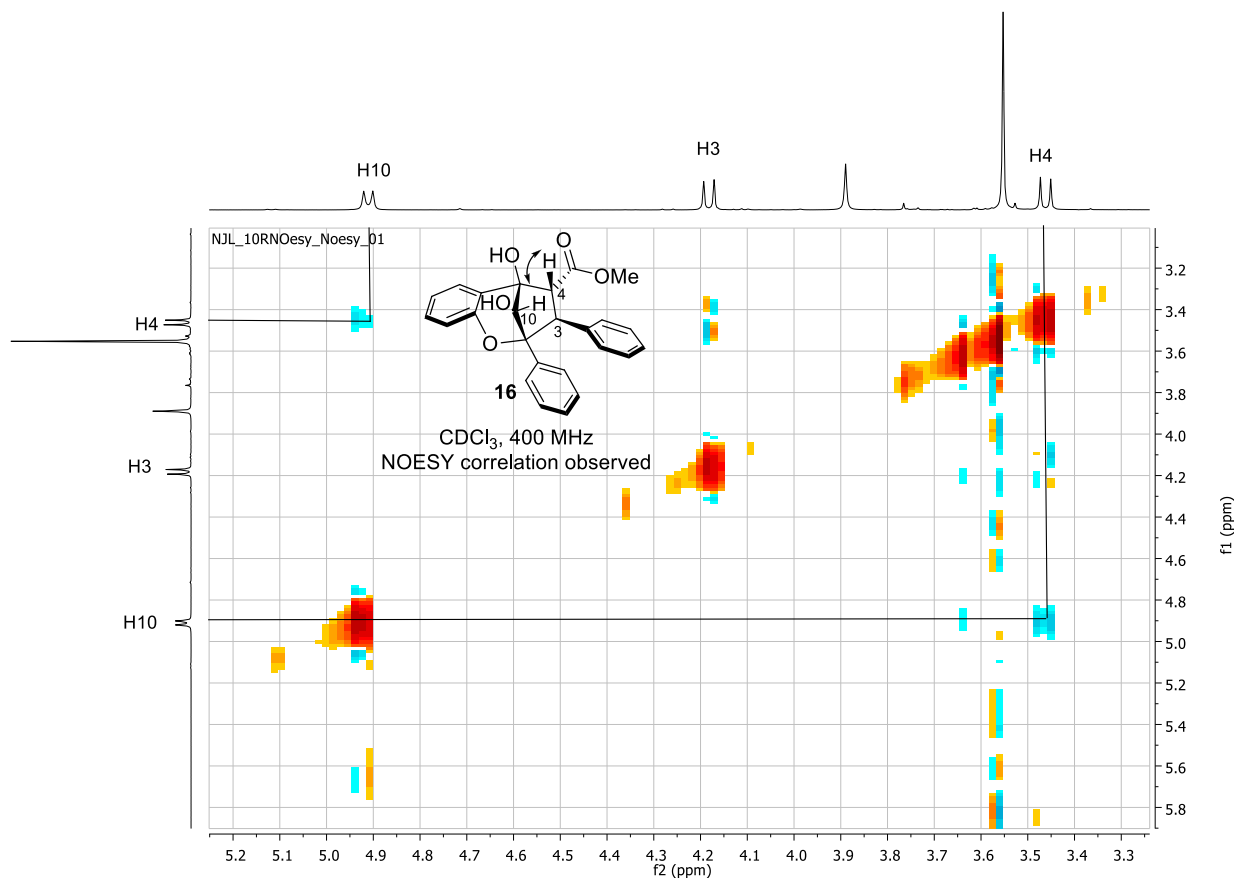

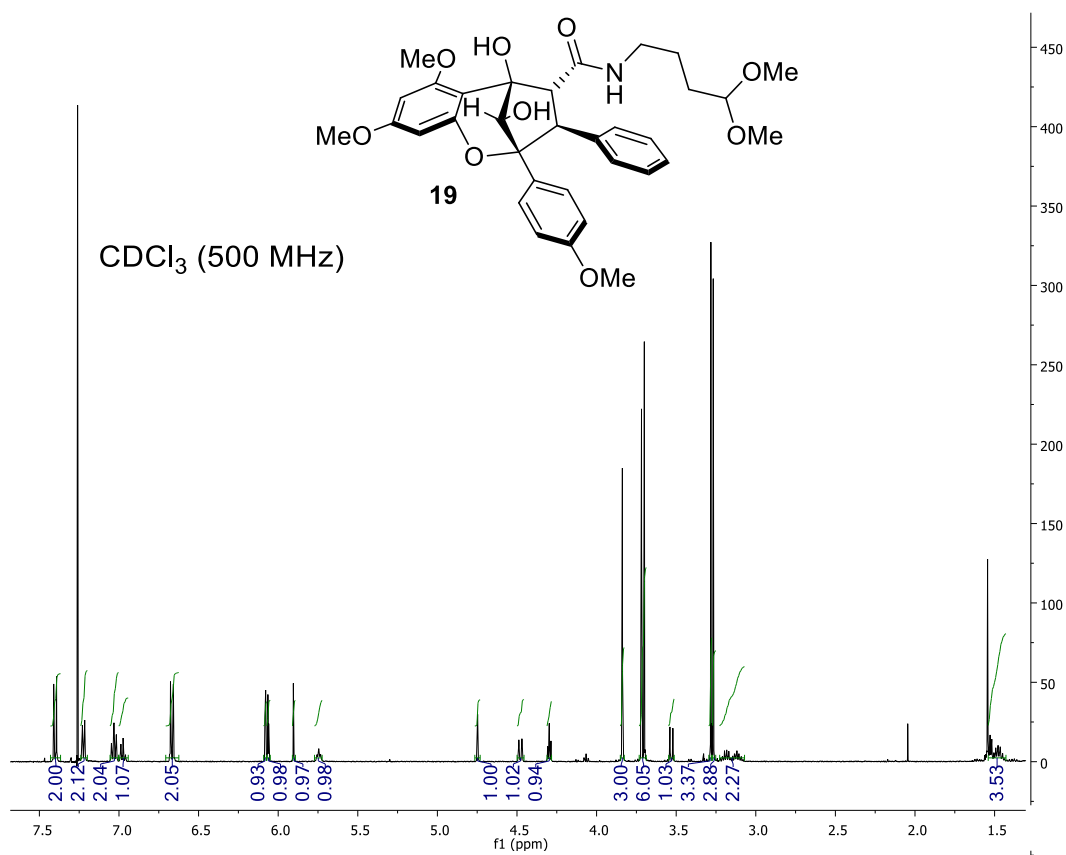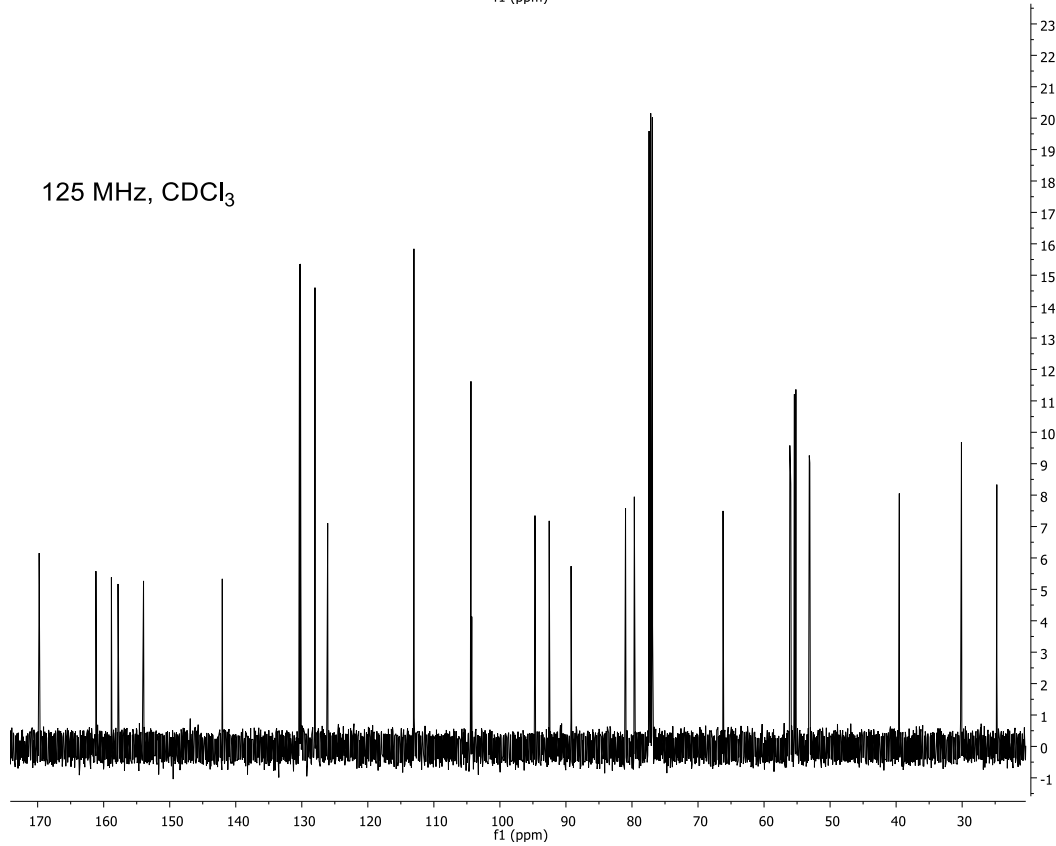

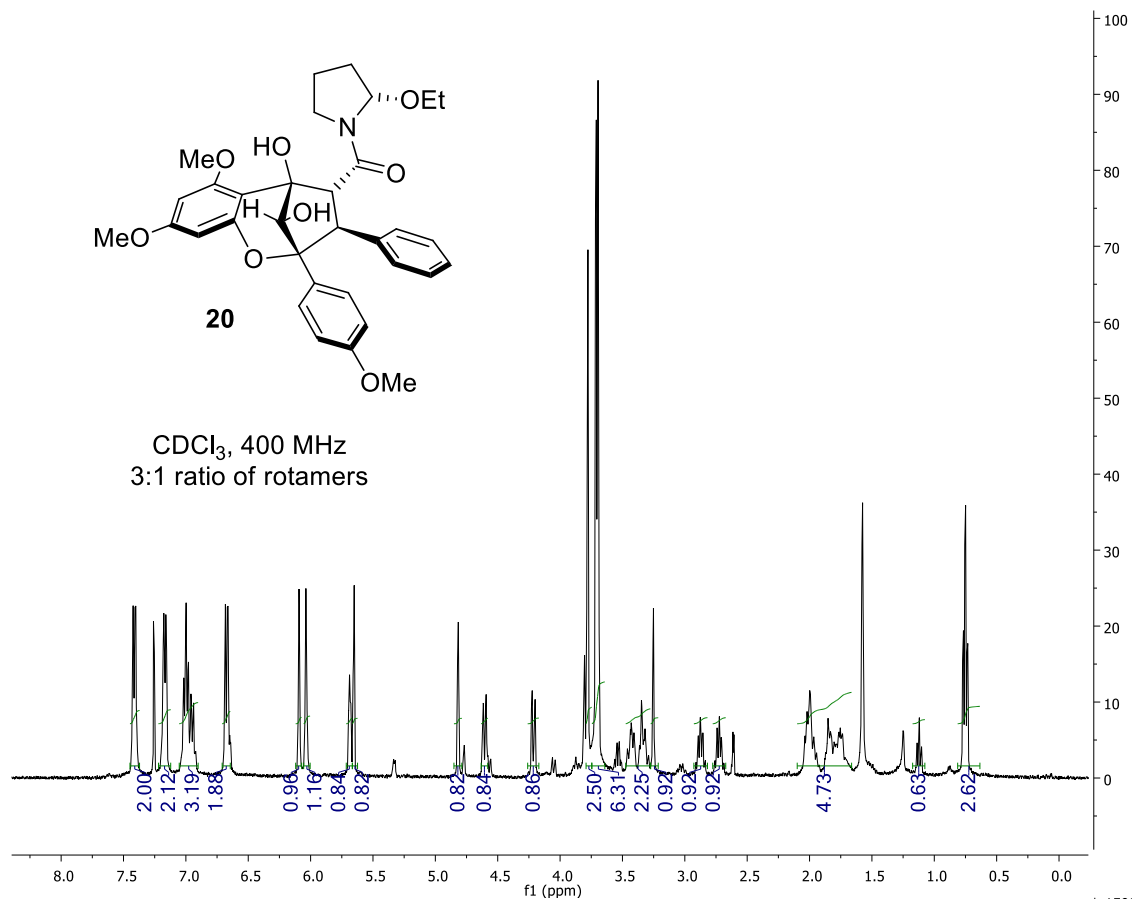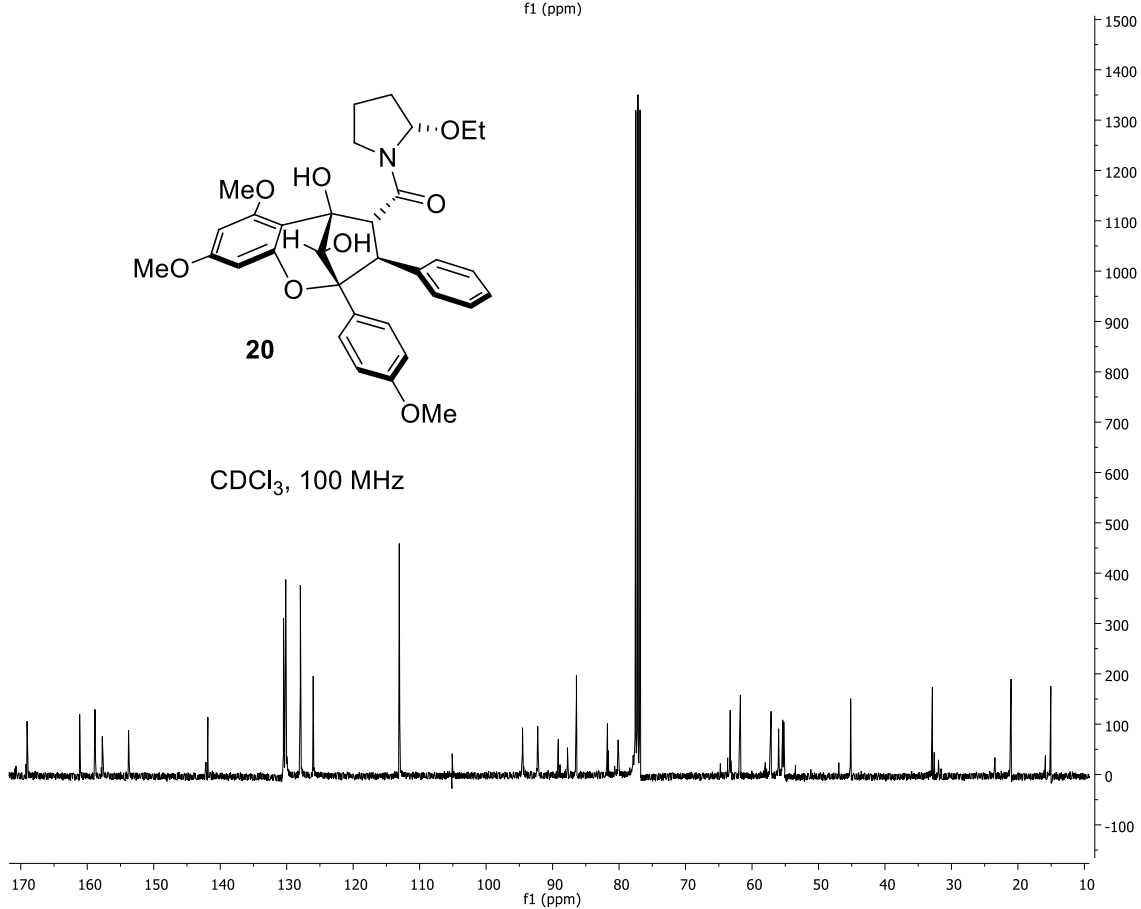



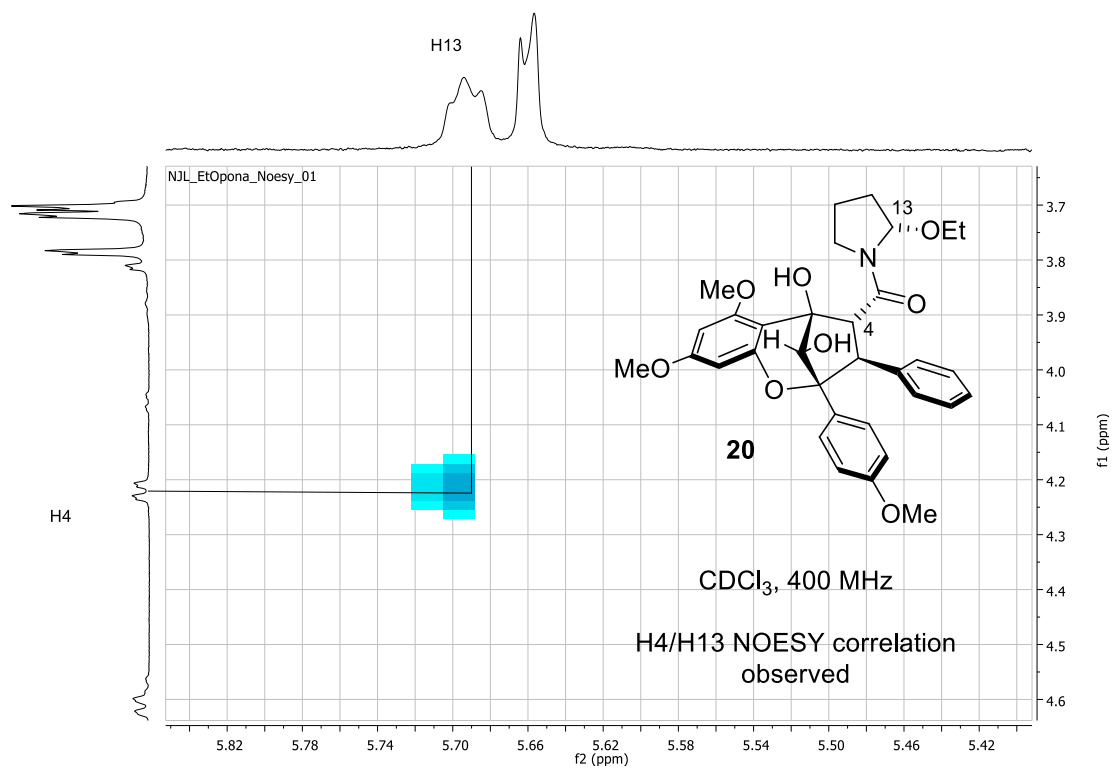

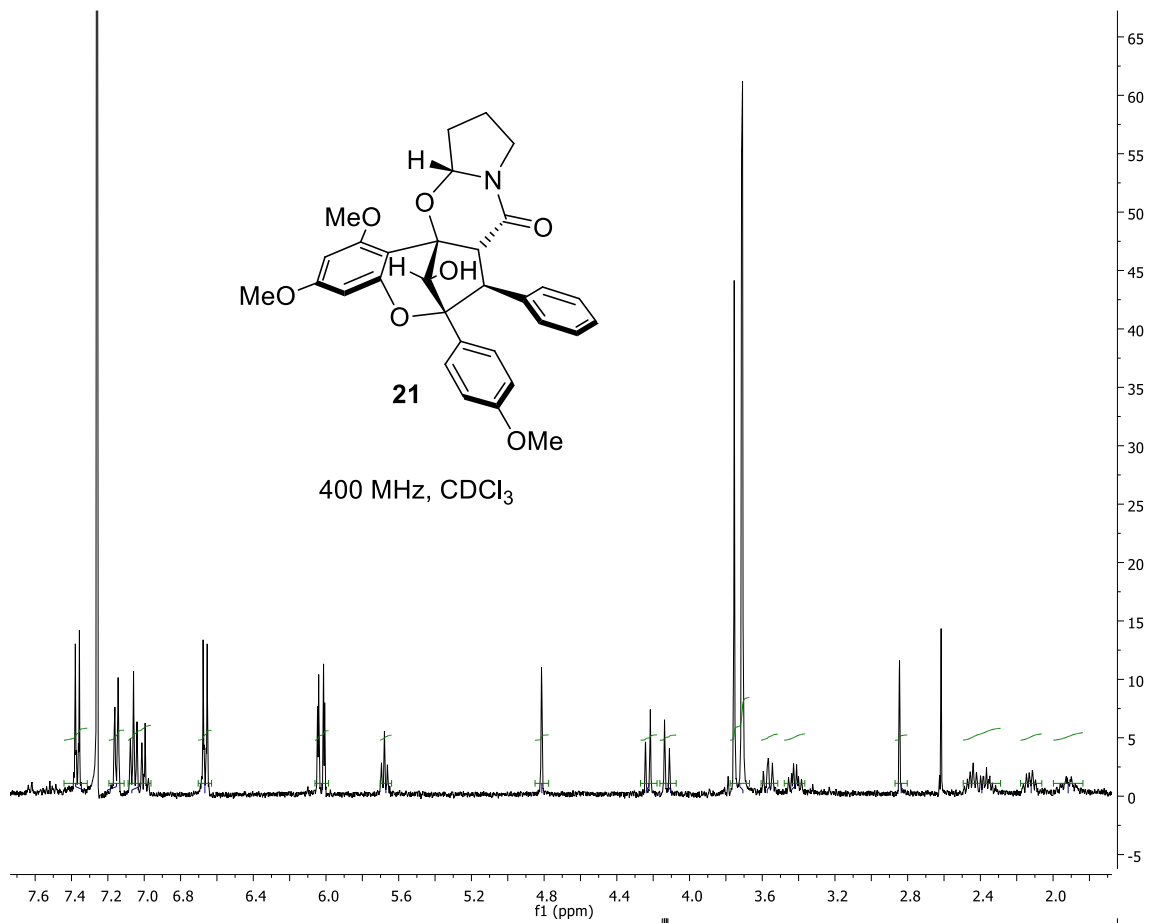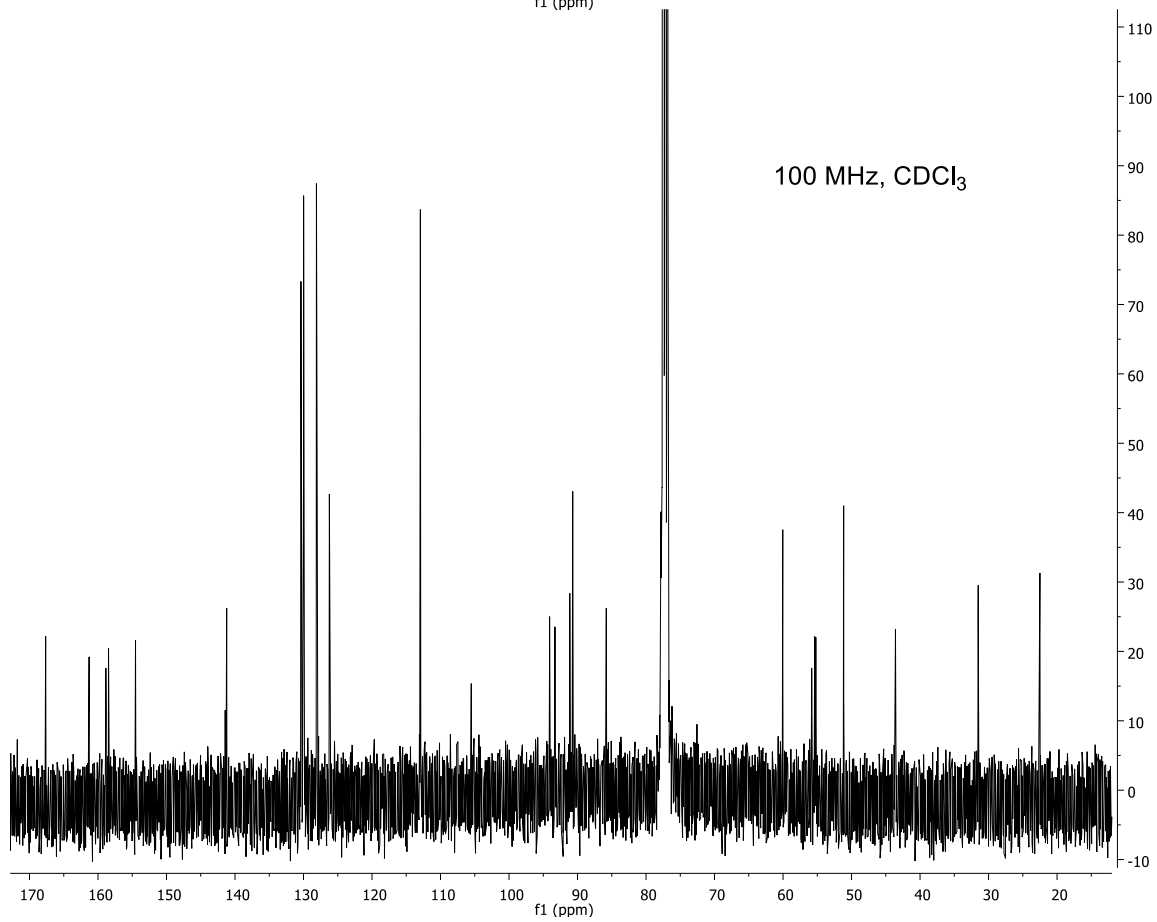

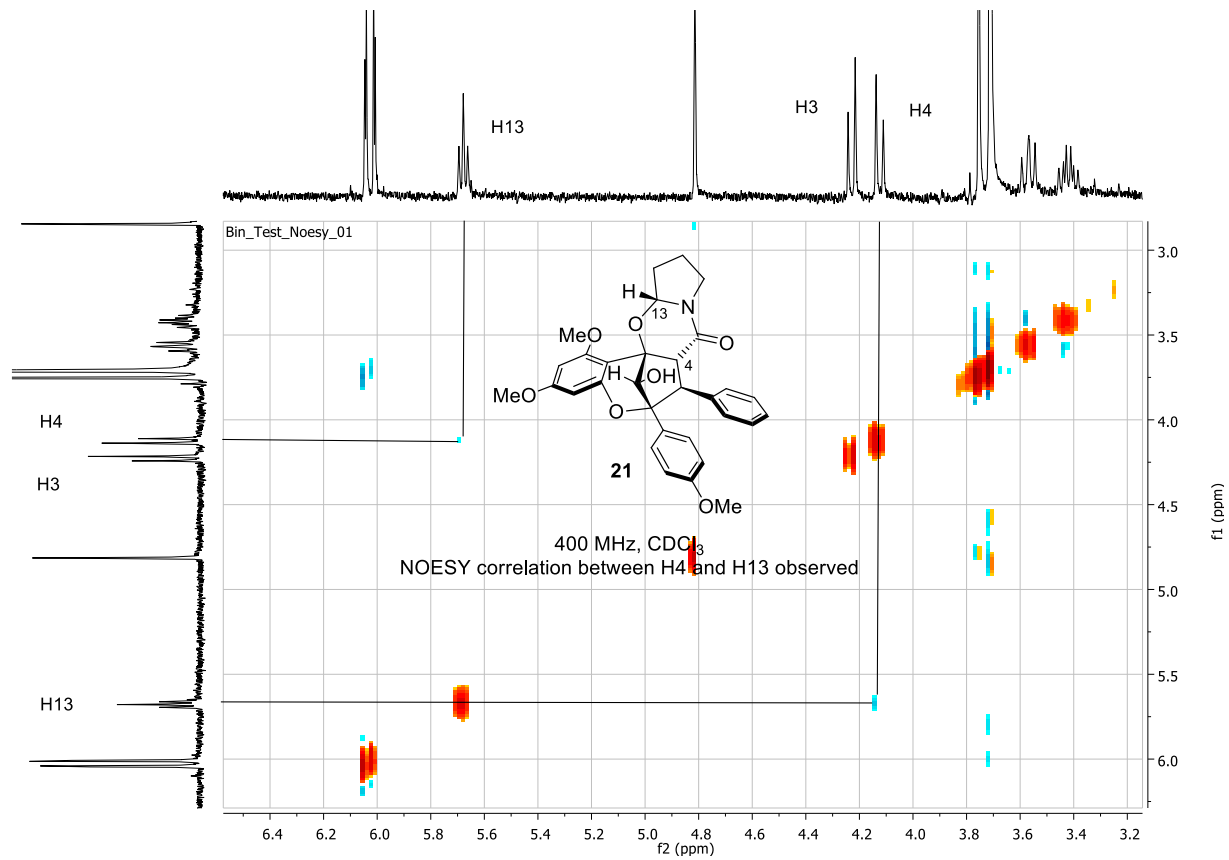

### III. NATURAL PRODUCTS SPECTRA

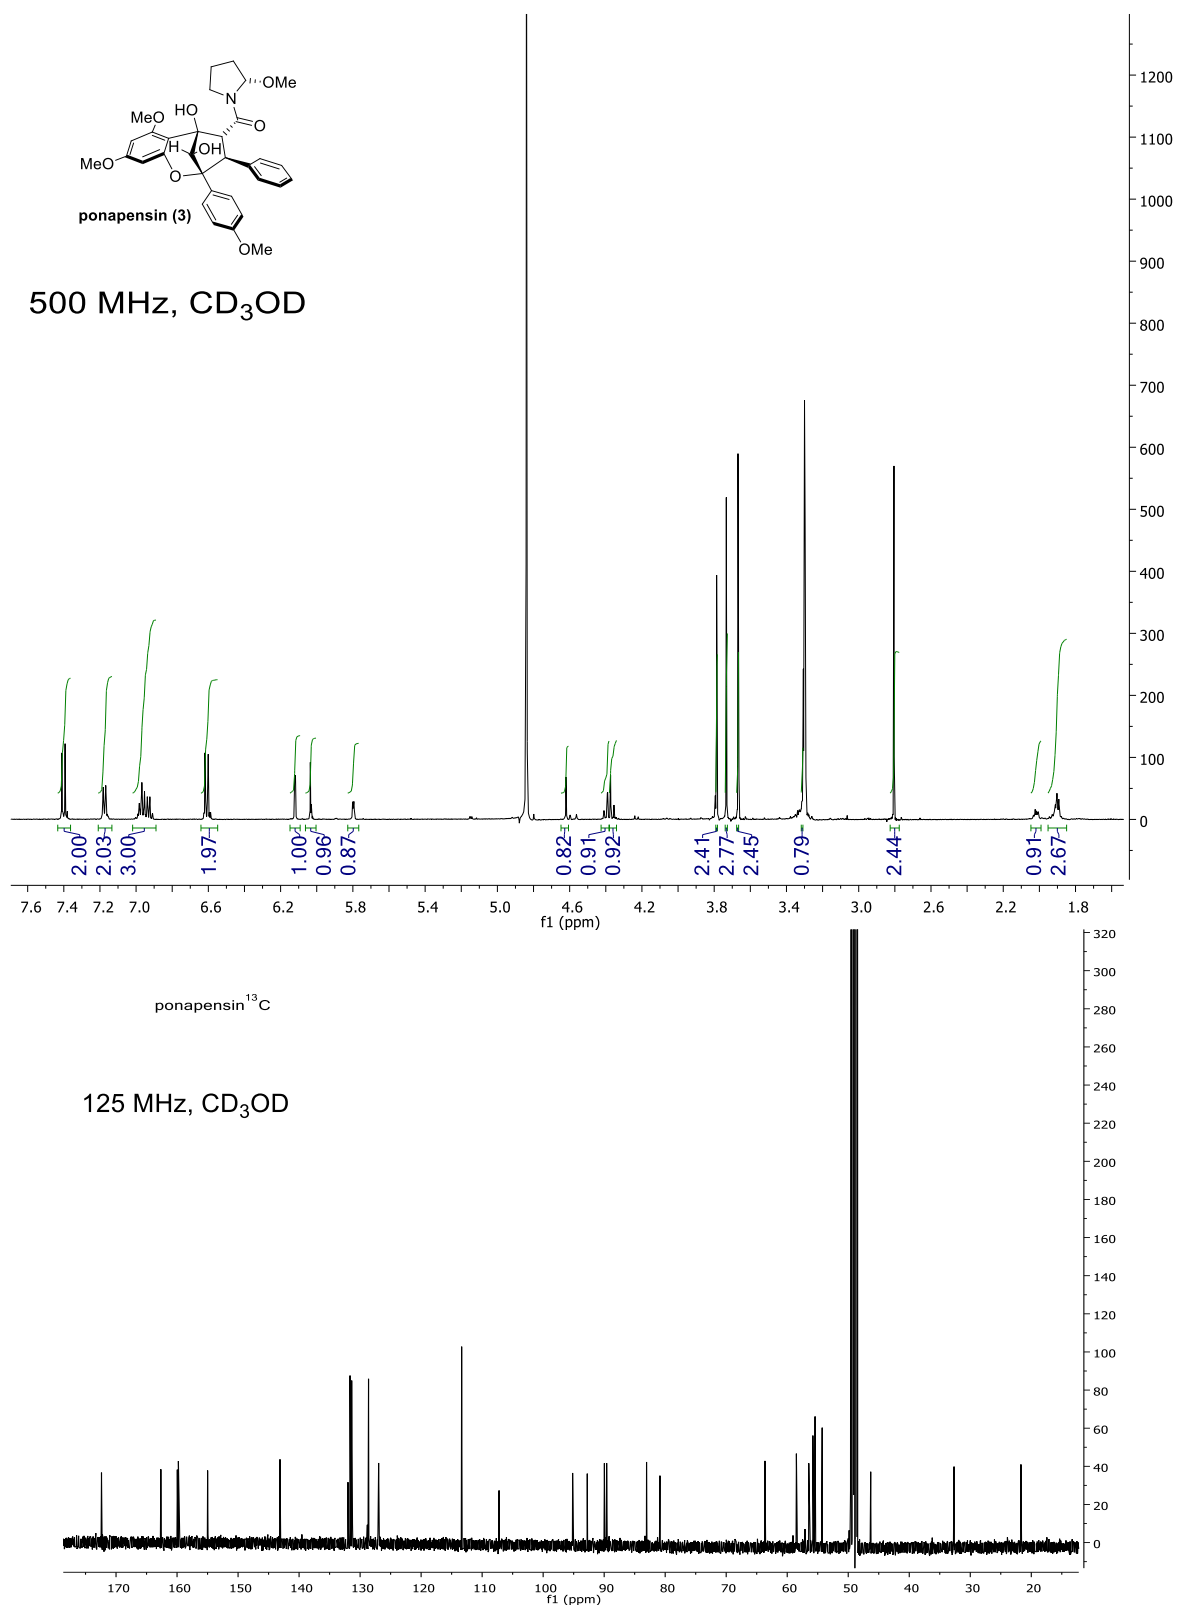

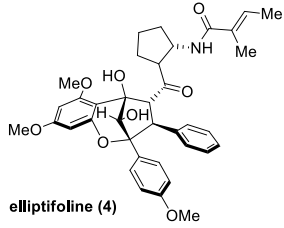

500 MHz, CDCl<sub>3</sub>

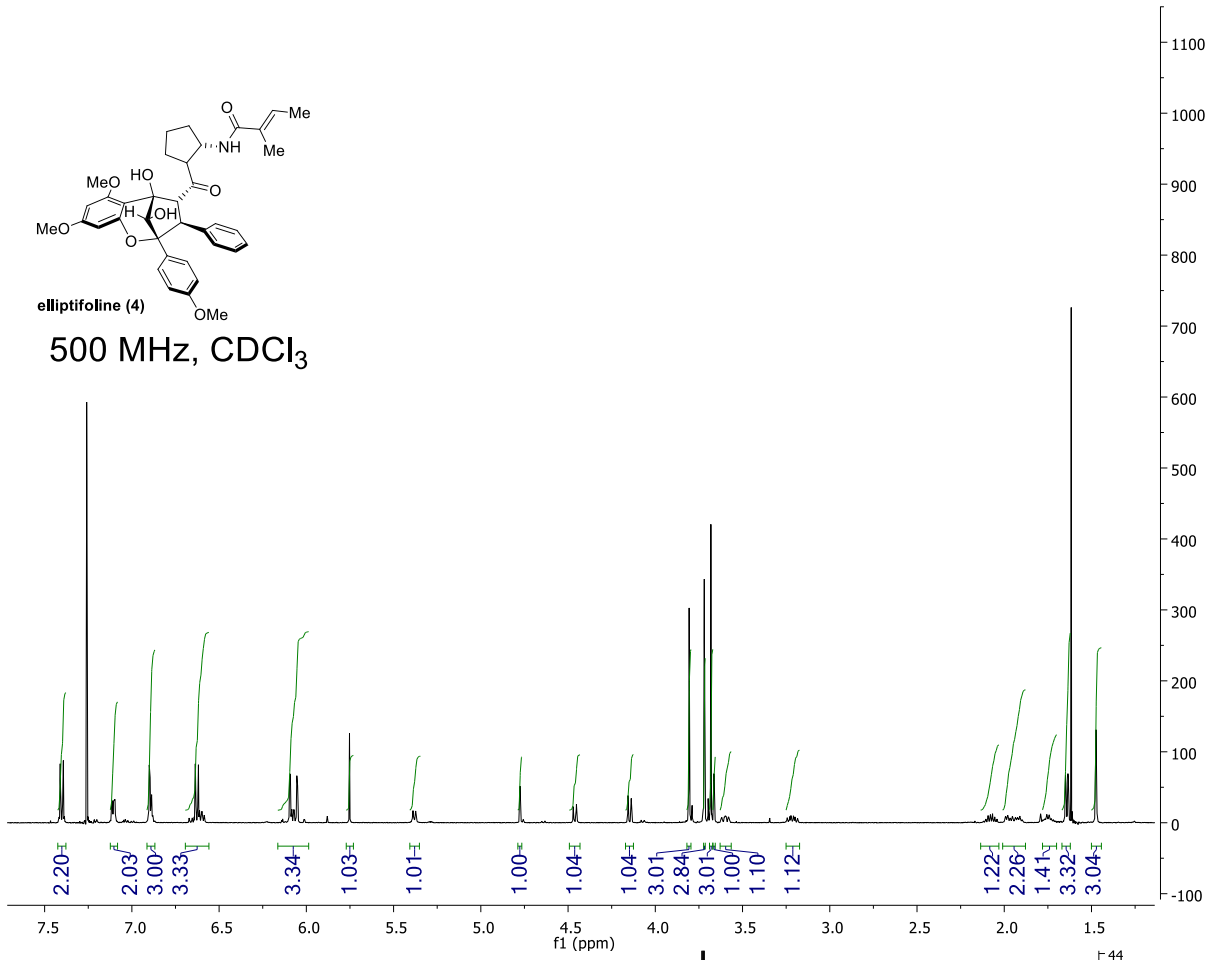

125 MHz, CDCl<sub>3</sub>

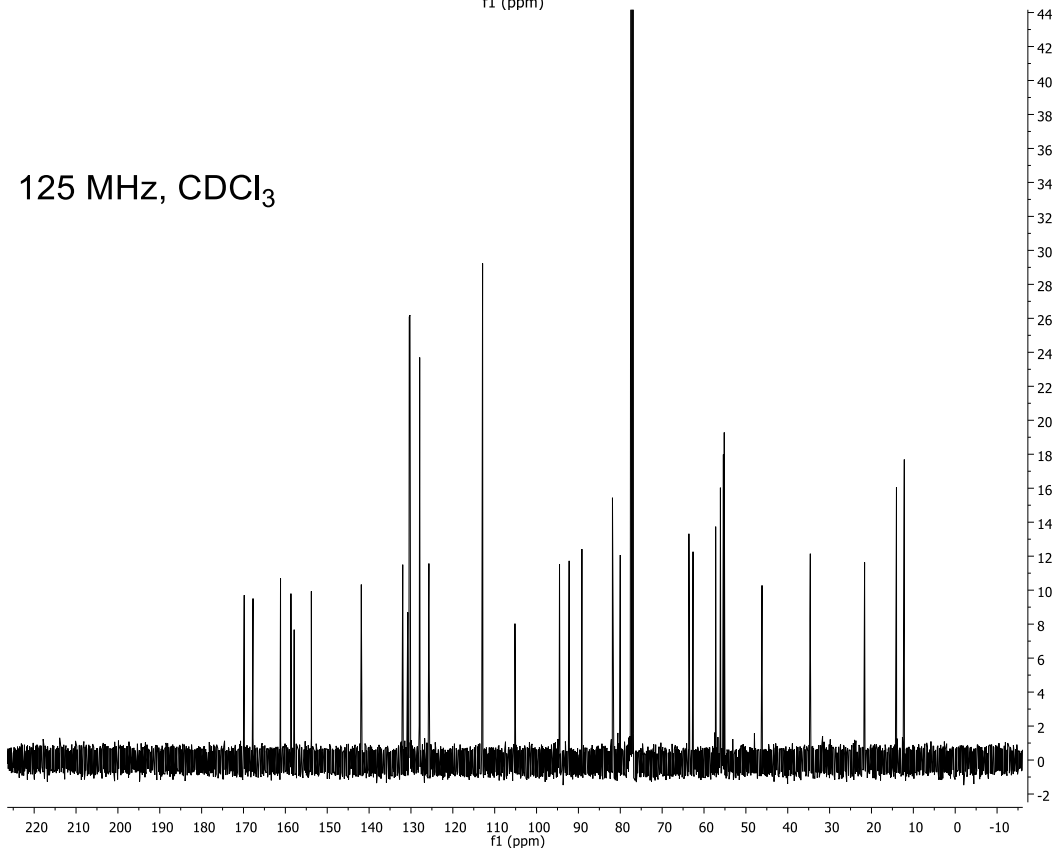

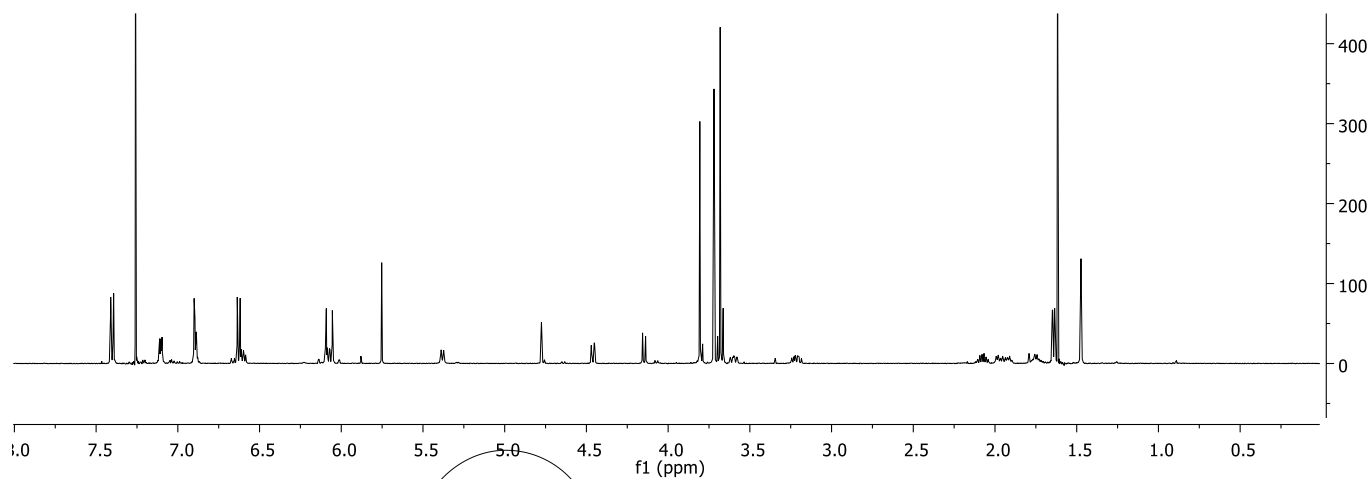

D-NOE, 500  
MHz

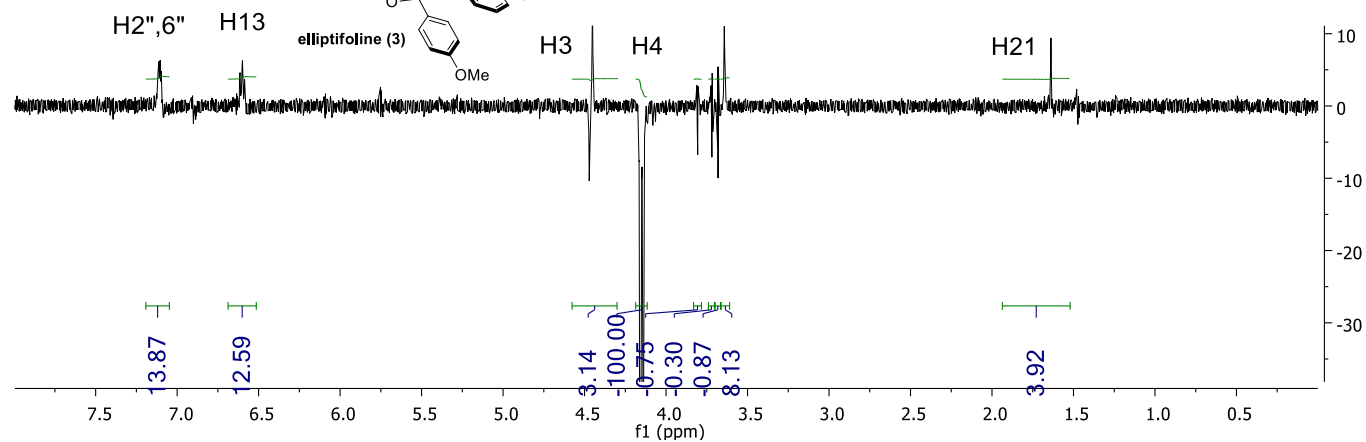

$^1\text{H}$  NMR from Duh and coworkers.<sup>S4</sup>

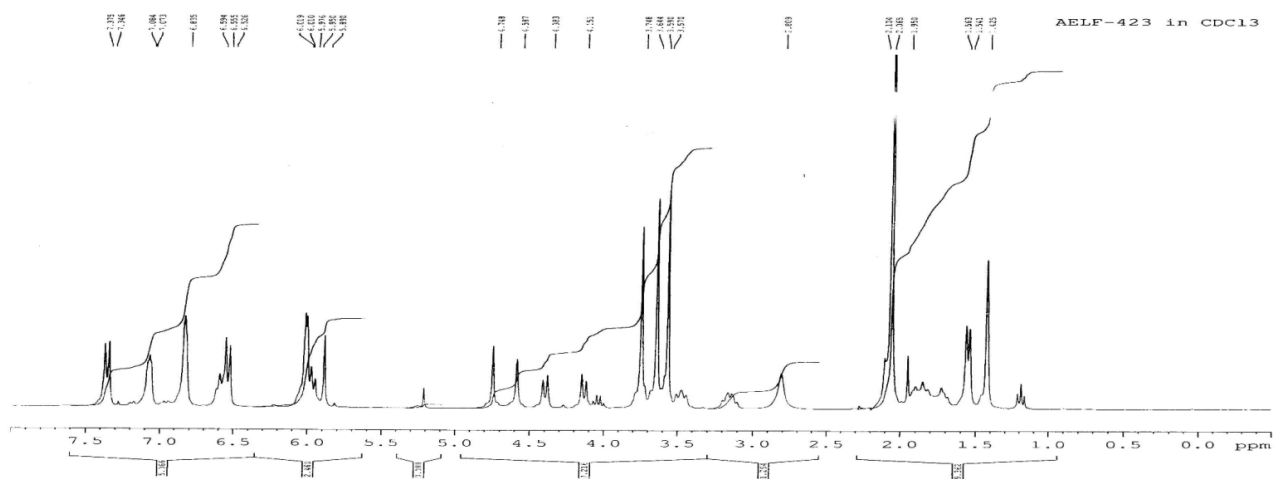

Synthetic:

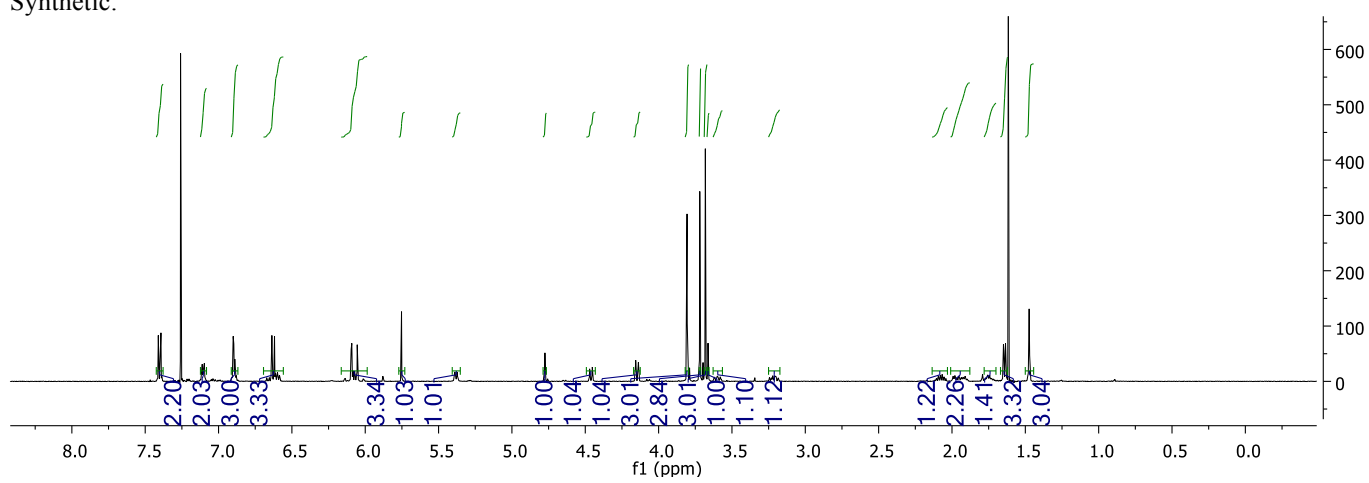

Supplement: NIHMS395901-supplement-4_si_004.pdf [file NIHMS395901-supplement-4_si_004.pdf]
